# Supplementary material for: Middle Miocene climate evolution in the northern Mediterranean region (Digne–Valensole basin, SE France)
Source: Copernicus journal article supplement (doi:10.5194/cp-21-841-2025), 2025-04-22
Supplement: Supplementary file 1 [file cp-21-841-2025-supplement.zip]

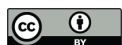

*Supplement of*

**Middle Miocene climate evolution in the northern Mediterranean region (Digne–Valensole basin, SE France)**

**Armelle Ballian et al.**

*Correspondence to:* Armelle Ballian ([armelle.ballian@senckenberg.de](mailto:armelle.ballian@senckenberg.de))

- [cp-21-841-2025-supplement-title-page.pdf](#)
- [Ballian\\_SM.pdf](#)
- [Ballian\\_SM.xlsx](#)

The copyright of individual parts of the supplement might differ from the article licence.
