# Supplementary material for: Middle Miocene climate evolution in the northern Mediterranean region (Digne–Valensole basin, SE France)
Source: Copernicus journal article supplement (doi:10.5194/cp-21-841-2025), 2025-04-22
Supplement: Supplementary file 1 [file cp-21-841-2025-supplement.zip]

## Sheet: proc_params
Sessions	Optimization algorithm	Standardization scale	d18 standards	d13 standards	lambda	working gas	D47 standards
Session 2,Session 1,Session 3,Session 4,Session 5	pooled	ICDES	TO BE ADDED	TO BE ADDED	TO BE ADDED	TO BE ADDED	{'ETH-1': 0.2052, 'ETH-2': 0.2085, 'ETH-3': 0.6132}

## Sheet: summary
Sample	N	d13C_VPDB	SD_d13C	d18O_CO2_VSMOW	d18O_CO2_VPDB	SD_d18O	D47	SE_D47	2SE_D47	SD_D47	d47	T(∆47)_min (Anderson21)	T(∆47)_mean (Anderson21)	T(∆47)_max (Anderson21)
98GR02	15	-7.14	0.0811134	33.57	2.57324	0.15008	0.5773	0.012	0.0235	0.052	5.06363	22.67	30.77	39.58
98GR08	18	-6.86	0.0559924	33.7	2.69934	0.161817	0.5652	0.0108	0.0211	0.0192	5.1352	27.59	35.21	43.44
98GR18	18	-6.74	0.0738872	33.92	2.91274	0.186395	0.5914	0.0108	0.0212	0.0467	5.38231	18.84	25.83	33.35
98GR24	11	-6.9	0.041904	33.88	2.87394	0.123786	0.5884	0.0141	0.0277	0.042	5.0091	17.73	26.87	36.91
98GR29	17	-6.56	0.380695	33.78	2.77694	0.320681	0.6071	0.0113	0.0222	0.0421	5.68393	13.67	20.61	28.08
98GR34	17	-6.24	0.115167	33.51	2.51504	0.25035	0.5666	0.0111	0.0217	0.0438	5.43077	26.9	34.69	43.12
98RE30	10	-7.48	0.0363972	32.87	1.89423	0.0643052	0.5895	0.0148	0.029	0.0387	3.40442	16.98	26.49	36.99
98RE46A	8	-7.74	0.0312227	33.22	2.23373	0.0623656	0.5829	0.0163	0.032	0.0341	3.64285	18.11	28.78	40.72
98RU30	10	-7.38	0.0448854	33.03	2.04943	0.108247	0.5866	0.0147	0.0288	0.0275	3.6558	17.95	27.49	38.03
98RU32	14	-7.32	0.0643236	32.68	1.70993	0.155664	0.5675	0.0125	0.0244	0.0418	3.47425	25.66	34.35	43.85
99CH01	13	-8.66	0.0344992	33.02	2.03973	0.115447	0.6074	0.0135	0.0265	0.0826	2.94421	12.29	20.51	29.49
99CH03	16	-9.9	0.21735	32.59	1.62263	0.562017	0.6192	0.0118	0.0231	0.0376	1.36862	9.82	16.76	24.24
99CH10	17	-6.28	0.0951798	33.88	2.87394	0.19651	0.5885	0.0113	0.0221	0.0231	6.03885	19.48	26.83	34.76
99CH14	11	-8.24	0.017714	35.04	3.99915	0.163668	0.5705	0.0141	0.0276	0.0549	5.3097	23.57	33.24	43.93
99CH16	14	-6.15	0.0445124	34.12	3.10674	0.096051	0.5677	0.0123	0.0242	0.0335	6.55522	25.66	34.28	43.69
99GR22	17	-7.59	0.115831	33.69	2.68964	0.2008	0.5547	0.0111	0.0217	0.0417	4.56449	31.1	39.23	48.04
Carrara	124	1.96	0.0738097	37.7	6.57938	0.174518	0.3131	0.0047	0.0092	0.0414	17.6395	208.85	222.59	237.58
ETH-1	177	2.02	0.0726648	37.02	5.91977	0.186073	0.2052			0.0444	16.7422	108.82	600.73	108.82
ETH-2	194	-10.17	0.0689446	19.88	-10.7062	0.16194	0.2085			0.0422	-12.1752	108.82	573.86	108.82
ETH-3	384	1.71	0.0763008	37.53	6.41448	0.1823	0.6132			0.041	17.3377	108.82	18.65	108.82
ETH-4	145	-10.23	0.0740774	19.73	-10.8517	0.192658	0.4466	0.0054	0.0105	0.0389	-12.1775	86.02	92.4	99.14

## Sheet: replicates
UID	Session	Sample	d13Cwg_VPDB	d18Owg_VSMOW	d45	d46	d47	d48	d49	d13C_VPDB	d18O_VSMOW	d18O_VPDB	D47raw	D48raw	D49raw	D47	Timetag	Project	Type
130	Session 3	98GR02	-4.221	25.26	-2.64391	8.15362	5.01065	15.9837	-8.57785	-7.28164	33.5973	2.59968	-0.253877	-0.383817	-21.5149	0.627837	2022-06-29 16:13:50
198	Session 3	98GR02	-4.221	25.26	-2.50014	8.30422	5.23649	16.5306	-10.4151	-7.13387	33.751	2.74883	-0.32474	-0.14443	-23.7649	0.551473	2022-07-04 18:32:45
87	Session 3	98GR02	-4.221	25.26	-2.53314	8.00447	4.90999	17.6124	-10.7734	-7.15804	33.4444	2.4514	-0.323159	1.51497	-23.5136	0.552669	2022-07-03 00:24:56
118	Session 3	98GR02	-4.221	25.26	-2.58635	8.29148	5.08134	16.3986	-4.95507	-7.22533	33.7382	2.73638	-0.377473	-0.249041	-18.2637	0.49291	2022-06-27 23:56:32
538	Session 3	98GR02	-4.221	25.26	-2.46445	8.22847	5.26717	16.4074	-2.95141	-7.09303	33.6734	2.67357	-0.257295	-0.115421	-16.2942	0.628499	2022-07-09 03:59:36
544	Session 3	98GR02	-4.221	25.26	-2.42521	8.19845	5.18357	16.1715	-4.92688	-7.05008	33.6426	2.64369	-0.351767	-0.287943	-18.227	0.52191	2022-07-07 20:32:07
262	Session 3	98GR02	-4.221	25.26	-2.62824	7.79876	4.6366	15.1365	1.6732	-7.2519	33.2341	2.24745	-0.296241	-0.513809	-10.7301	0.578166	2022-06-16 07:41:26
500	Session 3	98GR02	-4.221	25.26	-2.586	8.07913	4.90468	16.6802	-3.23467	-7.21716	33.5209	2.52562	-0.346562	0.449326	-16.1596	0.528481	2022-07-13 06:29:18
92	Session 3	98GR02	-4.221	25.26	-2.47625	8.1349	5.18114	16.538	-6.61371	-7.10217	33.5777	2.58073	-0.239449	0.198768	-19.7164	0.64429	2022-07-02 14:49:15
381	Session 3	98GR02	-4.221	25.26	-2.54436	8.2661	5.24369	16.5783	-5.31432	-7.17962	33.7121	2.7111	-0.234696	-0.021891	-18.6136	0.641328	2022-06-11 06:53:48
268	Session 3	98GR02	-4.221	25.26	-2.45574	8.22826	5.26679	16.5149	-2.91237	-7.08373	33.6732	2.67334	-0.26648	-0.009239	-16.2644	0.609154	2022-06-15 20:53:56
310	Session 4	98GR02	-4.221	25.26	-2.4132	7.73476	4.84687	15.0861	7.3342	-6.993	33.2668	2.2791	-0.247001	-0.436551	-5.24377	0.638026	2022-08-01 13:23:10
347	Session 4	98GR02	-4.221	25.26	-2.53443	8.08803	5.02001	16.4834	-2.62095	-7.13528	33.6288	2.63027	-0.293855	0.238024	-15.6251	0.586042	2022-07-28 20:02:54
506	Session 3	98GR02	-4.221	25.26	-2.45771	8.12555	5.07564	17.1533	-2.66235	-7.08206	33.5681	2.5714	-0.354429	0.822682	-15.8187	0.519304	2022-07-11 21:37:30
385	Session 3	98GR02	-4.221	25.26	-2.44884	8.11552	5.08983	16.2579	-2.68728	-7.07223	33.5578	2.56143	-0.339718	-0.038412	-15.8334	0.531639	2022-06-10 21:20:20
1090	Session 5	98GR08	-4.221	25.26	-2.33758	8.00802	5.12033	16.0173	6.45535	-6.88786	33.5772	2.58027	-0.319627	-0.061902	-6.72124	0.56419	2023-11-25 19:24:49
1037	Session 5	98GR08	-4.221	25.26	-2.29225	8.13707	5.30664	16.6935	-24.1873	-6.84438	33.7086	2.70765	-0.307014	0.347401	-37.2516	0.57854	2023-11-18 23:32:45
1301	Session 2	98GR08	-4.221	25.26	-2.42023	8.1011	5.15499	14.3931	0.008274	-6.9176	33.7032	2.70239	-0.290429	-1.84471	-13.1758	0.575749	2021-10-21 06:56:00
1669	Session 2	98GR08	-4.221	25.26	-2.34517	8.25468	5.39267	15.2818	-0.561948	-6.84333	33.8599	2.85445	-0.281396	-1.27459	-14.1127	0.569778	2021-09-28 09:40:30
1375	Session 1	98GR08	-4.221	25.26	-2.98543	6.63912	3.10722	15.1913	3.66636	-6.89296	33.6584	2.65897	-0.318285	1.84433	-6.1373	0.529691	2021-09-14 18:37:09
804	Session 5	98GR08	-4.221	25.26	-2.37663	7.77088	4.86992	15.9314	-2.58398	-6.9207	33.3358	2.34609	-0.297114	0.32418	-15.146	0.591038	2023-11-10 15:21:26
853	Session 5	98GR08	-4.221	25.26	-2.32719	7.91088	5.03908	15.7495	60.7146	-6.87325	33.4783	2.48428	-0.316463	-0.132732	47.0143	0.57116	2023-11-05 21:58:56
1003	Session 5	98GR08	-4.221	25.26	-2.19851	8.36822	5.61731	17.0265	65.4569	-6.75315	33.9438	2.93579	-0.32035	0.21634	50.6139	0.569962	2023-10-24 06:13:33
1132	Session 5	98GR08	-4.221	25.26	-2.30383	8.07878	5.22155	16.1579	4.99012	-6.85456	33.6492	2.65009	-0.322826	-0.063953	-8.33984	0.562308	2023-11-15 08:34:43
1266	Session 2	98GR08	-4.221	25.26	-2.37638	8.18763	5.26692	16.9126	3.11336	-6.87409	33.7915	2.78806	-0.308818	0.462616	-10.3249	0.546173	2021-10-08 07:18:43
914	Session 5	98GR08	-4.221	25.26	-2.22491	8.16808	5.38581	16.446	111.303	-6.77389	33.74	2.73813	-0.328135	0.042385	96.2797	0.560107	2023-10-28 16:57:59
799	Session 5	98GR08	-4.221	25.26	-2.392	7.88946	4.90251	19.0908	69.3141	-6.9414	33.4566	2.46327	-0.364416	3.19894	55.6199	0.518997	2023-11-09 17:22:16
1774	Session 2	98GR08	-4.221	25.26	-2.31734	8.26848	5.42559	14.886	2.33512	-6.81422	33.8739	2.86807	-0.290882	-1.69129	-11.3109	0.555224	2021-09-23 14:55:11
1624	Session 2	98GR08	-4.221	25.26	-2.36154	8.15254	5.27956	15.1557	3.5748	-6.85701	33.7556	2.75325	-0.277384	-1.1963	-9.81766	0.587659	2021-10-18 23:56:21
761	Session 5	98GR08	-4.221	25.26	-2.38158	8.01615	5.09721	16.1629	5.69689	-6.93496	33.5856	2.5884	-0.305057	0.065206	-7.43884	0.583172	2023-11-07 04:32:13
1431	Session 2	98GR08	-4.221	25.26	-2.35108	8.12707	5.27142	15.1251	2.26526	-6.84494	33.7295	2.72798	-0.271455	-1.17592	-11.0717	0.58565	2021-10-05 04:52:14
1699	Session 2	98GR08	-4.221	25.26	-2.32941	8.26765	5.41059	15.0375	3.98942	-6.82703	33.8731	2.86727	-0.292515	-1.54062	-9.66479	0.555692	2021-09-26 06:07:27
998	Session 5	98GR08	-4.221	25.26	-2.21015	8.32626	5.5643	16.8411	-77.0386	-6.76399	33.9011	2.89436	-0.320109	0.117244	-89.8108	0.57041	2023-10-23 19:49:11
1451	Session 2	98GR18	-4.221	25.26	-2.23764	8.41245	5.65048	14.826	-2.28526	-6.73465	34.0209	3.01059	-0.290029	-2.03531	-16.2283	0.564931	2021-10-05 01:34:42
1357	Session 2	98GR18	-4.221	25.26	-2.22524	8.38363	5.6893	13.3631	10.1194	-6.7204	33.9914	2.982	-0.236161	-3.41699	-3.95417	0.62133	2021-09-30 06:59:24
1485	Session 2	98GR18	-4.221	25.26	-2.2435	8.40977	5.68829	15.2474	-1.51633	-6.74079	34.0182	3.00795	-0.243772	-1.61566	-15.4588	0.621367	2021-10-12 03:25:45
1062	Session 5	98GR18	-4.221	25.26	-2.32752	7.87556	5.03252	15.3683	52.081	-6.87231	33.4423	2.44939	-0.288204	-0.437944	38.564	0.598927	2023-11-19 01:10:03
775	Session 5	98GR18	-4.221	25.26	-2.27421	8.2068	5.39086	16.495	-6.97082	-6.82774	33.7795	2.77649	-0.30989	0.013759	-20.4176	0.57783	2023-11-07 10:13:39
1420	Session 1	98GR18	-4.221	25.26	-2.7503	7.12453	3.85877	14.558	4.93942	-6.66086	34.1532	3.13897	-0.286598	0.254545	-6.06876	0.564211	2021-09-14 05:23:47
816	Session 5	98GR18	-4.221	25.26	-2.2561	8.17593	5.36042	16.4201	0.148104	-6.80736	33.7481	2.74596	-0.328788	0.001339	-13.3548	0.556443	2023-11-11 23:44:07
721	Session 5	98GR18	-4.221	25.26	-2.25928	8.1922	5.52285	16.4567	-16.9769	-6.81133	33.7646	2.76204	-0.179857	0.005091	-30.276	0.717972	2023-11-02 12:03:35
819	Session 5	98GR18	-4.221	25.26	-2.27277	8.14244	5.29031	18.5218	34.3735	-6.82386	33.714	2.71291	-0.348626	2.13569	20.4933	0.535786	2023-11-09 18:29:36
1158	Session 5	98GR18	-4.221	25.26	-2.24992	8.22218	5.38207	17.9005	19.2655	-6.80247	33.7951	2.79163	-0.358738	1.36593	5.40719	0.524014	2023-11-14 01:37:43
1683	Session 2	98GR18	-4.221	25.26	-2.15101	8.54971	5.91997	13.3418	14.5643	-6.64747	34.1609	3.14644	-0.245478	-3.76602	0.025808	0.608374	2021-09-28 06:18:48
1639	Session 2	98GR18	-4.221	25.26	-2.2666	8.29564	5.55832	15.3426	0.223302	-6.76119	33.9016	2.89488	-0.237861	-1.29593	-13.4997	0.633666	2021-10-19 10:56:38
1389	Session 1	98GR18	-4.221	25.26	-2.88397	6.84588	3.45553	14.1155	0.953295	-6.79271	33.8692	2.86342	-0.278017	0.371684	-9.33123	0.57577	2021-09-15 05:35:08
934	Session 5	98GR18	-4.221	25.26	-2.13014	8.32309	5.63264	16.9698	53.3884	-6.67878	33.8976	2.89105	-0.331803	0.2501	38.729	0.556089	2023-10-28 19:44:08
1022	Session 5	98GR18	-4.221	25.26	-2.11842	8.50732	5.81466	17.0376	-13.6217	-6.67306	34.0852	3.07302	-0.342529	-0.048601	-27.7099	0.546585	2023-10-23 16:02:25
937	Session 5	98GR18	-4.221	25.26	-2.07397	8.58021	5.97046	17.4787	36.062	-6.62846	34.1594	3.14493	-0.304669	0.240473	21.0707	0.584825	2023-10-29 09:10:18
1718	Session 2	98GR18	-4.221	25.26	-2.19888	8.3886	5.72804	13.248	16.21	-6.69252	33.9964	2.98686	-0.229752	-3.53997	2.01359	0.622575	2021-09-26 02:49:10
1020	Session 5	98GR18	-4.221	25.26	-2.10959	8.534	5.93616	17.3339	175.646	-6.66465	34.1124	3.09936	-0.256907	0.189759	158.783	0.637552	2023-10-24 07:09:50
1711	Session 2	98GR24	-4.221	25.26	-2.40581	8.28829	5.42324	14.8232	-2.11439	-6.90911	33.8944	2.88791	-0.221058	-1.79229	-15.6448	0.631281	2021-09-25 18:56:19
1783	Session 2	98GR24	-4.221	25.26	-2.41959	8.23084	5.27877	14.7553	2.77758	-6.92167	33.8357	2.83099	-0.294467	-1.74533	-10.6939	0.551924	2021-09-24 01:16:12
1469	Session 2	98GR24	-4.221	25.26	-2.4539	8.16436	5.14256	14.2591	-2.66825	-6.95576	33.7679	2.76517	-0.329645	-2.10182	-15.9029	0.525598	2021-10-13 14:33:57
1346	Session 2	98GR24	-4.221	25.26	-2.36281	8.41268	5.49184	15.7345	-2.33578	-6.8679	34.0214	3.01109	-0.318538	-1.14239	-16.1469	0.531126	2021-09-29 23:11:53
1274	Session 2	98GR24	-4.221	25.26	-2.4228	8.18995	5.22885	16.3474	1.74184	-6.92359	33.794	2.79047	-0.30093	-0.098047	-11.6335	0.554395	2021-10-07 20:34:14
1677	Session 2	98GR24	-4.221	25.26	-2.33093	8.48522	5.64668	15.7206	0.016584	-6.83663	34.0955	3.08293	-0.268268	-1.2997	-14.0001	0.583314	2021-09-27 21:50:25
1443	Session 2	98GR24	-4.221	25.26	-2.33955	8.42449	5.61553	14.9497	-6.67326	-6.84358	34.0334	3.02275	-0.231131	-1.93753	-20.4712	0.629349	2021-10-04 17:25:39
1304	Session 2	98GR24	-4.221	25.26	-2.45364	8.14405	5.19867	15.2498	-4.07545	-6.95474	33.7471	2.74504	-0.254314	-1.0869	-17.2528	0.619415	2021-10-22 04:47:24
1623	Session 2	98GR24	-4.221	25.26	-2.37269	8.35162	5.47086	17.5249	-2.12516	-6.87617	33.959	2.95059	-0.269677	0.739461	-15.8117	0.598275	2021-10-20 04:11:30
1384	Session 1	98GR24	-4.221	25.26	-3.02696	6.69604	3.21882	13.2785	5.47415	-6.93918	33.7166	2.7154	-0.219662	-0.156379	-4.41357	0.641261	2021-09-15 03:09:31
1413	Session 1	98GR24	-4.221	25.26	-2.97832	6.83821	3.38434	13.8417	-0.02999	-6.89271	33.8615	2.85603	-0.243835	0.116916	-10.1897	0.611705	2021-09-14 03:00:00
1123	Session 5	98GR29	-4.221	25.26	-2.16495	8.13543	5.40767	16.3537	47.8682	-6.70892	33.7066	2.70574	-0.336567	0.016343	33.702	0.547976	2023-11-13 16:39:45
686	Session 5	98GR29	-4.221	25.26	-2.17129	8.1327	5.42552	16.3001	11.8755	-6.71557	33.7038	2.70306	-0.309591	-0.030981	-1.79206	0.579249	2023-11-02 02:58:57
862	Session 5	98GR29	-4.221	25.26	-2.18804	8.15321	5.44841	16.2833	-16.0456	-6.73414	33.7248	2.72336	-0.289518	-0.088174	-29.3575	0.59608	2023-11-28 19:11:34
646	Session 5	98GR29	-4.221	25.26	-2.10402	8.46465	5.85723	17.5427	19.5371	-6.65618	34.0418	3.03084	-0.273527	0.532647	5.04336	0.61923	2023-10-26 03:08:27
1080	Session 5	98GR29	-4.221	25.26	-2.20552	8.07318	5.31784	16.4289	6.96819	-6.74979	33.6433	2.64434	-0.323261	0.213827	-6.48152	0.560394	2023-11-24 23:22:58
984	Session 5	98GR29	-4.221	25.26	-2.10325	8.04467	5.47995	15.7618	-2129.85	-6.63997	33.614	2.61595	-0.239996	-0.386086	-2114.7	0.655542	2023-10-24 12:36:17
1028	Session 5	98GR29	-4.221	25.26	-2.20764	7.74747	5.05411	15.1971	61.9316	-6.74011	33.3116	2.32259	-0.265772	-0.352386	48.4156	0.623408	2023-11-17 16:51:14
657	Session 5	98GR29	-4.221	25.26	-1.77121	8.48369	6.24488	17.6581	24.8526	-6.30291	34.0604	3.04891	-0.250852	0.608346	9.88677	0.643037	2023-10-27 03:31:01
694	Session 5	98GR29	-4.221	25.26	-1.83423	8.98124	6.61979	18.0792	-4.015	-6.38817	34.5672	3.54056	-0.298068	0.035412	-19.444	0.59154	2023-11-01 07:55:59
829	Session 5	98GR29	-4.221	25.26	-2.19044	8.02895	5.32082	16.1235	31.3442	-6.73213	33.5982	2.60061	-0.292767	0.001056	17.6403	0.596698	2023-11-05 04:43:47
1034	Session 5	98GR29	-4.221	25.26	-1.97763	8.07087	5.61874	16.2616	8.55872	-6.50732	33.6404	2.64155	-0.257411	0.053821	-5.15001	0.631865	2023-11-18 17:48:22
742	Session 5	98GR29	-4.221	25.26	-2.24175	7.77305	5.11908	15.2243	12.2793	-6.77732	33.3377	2.34794	-0.190828	-0.376413	-0.618196	0.705576	2023-11-07 11:51:03
986	Session 5	98GR29	-4.221	25.26	-2.04245	8.41287	5.79128	16.815	-66.3141	-6.58881	33.9889	2.97955	-0.352251	-0.080199	-79.555	0.536247	2023-10-23 15:06:07
821	Session 5	98GR29	-4.221	25.26	-2.16655	8.11714	5.44993	16.4035	18.6428	-6.70995	33.688	2.68768	-0.275063	0.101611	4.90914	0.615864	2023-11-04 07:29:25
1066	Session 5	98GR29	-4.221	25.26	-0.7017	8.81056	7.68145	17.5647	90.8521	-5.17737	34.3908	3.36942	-0.24773	-0.131753	73.0126	0.640917	2023-11-21 05:43:29
1084	Session 5	98GR29	-4.221	25.26	-2.17136	8.07658	5.39027	16.2183	-0.273908	-6.71359	33.6467	2.64762	-0.289862	-0.000149	-13.6694	0.59604	2023-11-26 09:42:39
1124	Session 5	98GR29	-4.221	25.26	-2.17263	8.1033	5.39982	16.2544	-3.69404	-6.71591	33.6739	2.67402	-0.305112	-0.017649	-17.0936	0.581414	2023-11-14 23:32:57
746	Session 5	98GR34	-4.221	25.26	-1.43546	8.50365	6.53739	16.8866	-54.0357	-5.94654	34.0799	3.06787	-0.326631	-0.189753	-68.2198	0.559643	2023-11-07 01:07:30
693	Session 5	98GR34	-4.221	25.26	-1.79348	7.81443	5.61845	15.6613	-15.6716	-6.30206	33.3788	2.38781	-0.19797	-0.028223	-28.7565	0.698548	2023-11-02 13:11:33
649	Session 5	98GR34	-4.221	25.26	-1.53769	8.30427	6.15912	17.1125	31.5493	-6.04797	33.8771	2.87114	-0.402474	0.427821	16.5876	0.481242	2023-10-26 22:50:59
1617	Session 2	98GR34	-4.221	25.26	-1.83842	7.87247	5.51992	14.2197	-1.26187	-6.28989	33.4682	2.47448	-0.306087	-1.56255	-14.6026	0.554536	2021-10-18 20:45:08
1281	Session 2	98GR34	-4.221	25.26	-1.87203	7.78011	5.43323	14.1512	1.52765	-6.32228	33.3739	2.38301	-0.267472	-1.44699	-11.6369	0.603413	2021-10-21 22:14:03
1769	Session 2	98GR34	-4.221	25.26	-1.73525	8.09842	5.85639	14.0649	6.98499	-6.18836	33.6988	2.69821	-0.298535	-2.16238	-7.01279	0.547388	2021-09-23 17:23:36
1464	Session 2	98GR34	-4.221	25.26	-1.82637	7.83067	5.52224	14.5207	-2.65437	-6.27553	33.4254	2.43302	-0.275462	-1.18339	-15.9089	0.585	2021-10-11 14:08:40
1064	Session 5	98GR34	-4.221	25.26	-1.88535	7.52952	5.13508	15.2594	3.15088	-6.38933	33.0889	2.10655	-0.3058	0.141547	-9.53703	0.579872	2023-11-19 05:48:36
1126	Session 5	98GR34	-4.221	25.26	-1.8028	7.74755	5.38667	16.0616	22.7434	-6.30952	33.3108	2.32176	-0.353563	0.498652	9.28946	0.529592	2023-11-14 00:29:48
1326	Session 2	98GR34	-4.221	25.26	-1.69814	8.21406	6.02062	15.3637	3.8882	-6.15309	33.8169	2.81274	-0.286396	-1.11358	-10.3288	0.566519	2021-09-30 05:41:53
687	Session 5	98GR34	-4.221	25.26	-1.83181	7.67385	5.34485	15.3556	45.9771	-6.33768	33.2358	2.24902	-0.293292	-0.050224	32.3979	0.596984	2023-11-01 03:19:25
1395	Session 1	98GR34	-4.221	25.26	-2.3763	6.55505	3.67375	13.1815	-4.34555	-6.2425	33.5712	2.57438	-0.301789	0.028051	-14.551	0.54644	2021-09-13 18:28:10
782	Session 5	98GR34	-4.221	25.26	-1.80396	7.73181	5.39407	15.4963	2.78193	-6.31018	33.2947	2.30621	-0.329651	-0.02667	-10.3778	0.555466	2023-11-12 03:22:00
1370	Session 1	98GR34	-4.221	25.26	-2.37384	6.5654	3.68052	15.1177	2.5292	-6.24027	33.5817	2.58462	-0.307689	1.91854	-7.76938	0.541194	2021-09-14 17:48:04
788	Session 5	98GR34	-4.221	25.26	-1.81568	7.74109	5.40237	16.1899	11.778	-6.32299	33.3042	2.31541	-0.318336	0.637877	-1.50541	0.568153	2023-11-10 04:33:06
903	Session 5	98GR34	-4.221	25.26	-1.60903	8.13199	5.99805	17.8759	17.9027	-6.11753	33.7018	2.7011	-0.320887	1.52093	3.55223	0.567567	2023-10-29 02:13:01
905	Session 5	98GR34	-4.221	25.26	-1.69615	7.87331	5.64039	22.6941	71.9305	-6.20071	33.4386	2.44575	-0.334145	6.77835	57.4497	0.553835	2023-10-28 02:54:26
1715	Session 2	98RE30	-4.221	25.26	-2.99553	7.30013	3.8117	13.1529	-2.50948	-7.50061	32.886	1.90978	-0.251096	-1.47902	-13.5153	0.599188	2021-09-25 22:13:02
1452	Session 2	98RE30	-4.221	25.26	-2.97822	7.36109	3.85502	12.9644	-6.47877	-7.48441	32.9483	1.97017	-0.285359	-1.78562	-17.5758	0.569801	2021-10-04 20:38:00
1459	Session 2	98RE30	-4.221	25.26	-2.91628	7.30003	3.83619	12.9539	-5.01695	-7.41624	32.8858	1.90951	-0.308617	-1.67494	-16.0783	0.549345	2021-10-13 12:07:46
1803	Session 2	98RE30	-4.221	25.26	-2.97554	7.25824	3.82047	11.1418	14.3088	-7.47779	32.8432	1.86822	-0.222179	-3.37814	3.17788	0.628025	2021-09-23 22:49:17
1645	Session 2	98RE30	-4.221	25.26	-3.04597	7.15364	3.58408	12.6178	-3.86075	-7.54892	32.7365	1.7647	-0.282702	-1.71603	-14.517	0.58329	2021-10-20 01:03:06
1421	Session 1	98RE30	-4.221	25.26	-3.57172	5.84625	1.71927	12.1409	-5.07657	-7.487	32.8506	1.87539	-0.321326	0.409371	-12.6494	0.526496	2021-09-14 07:02:06
1352	Session 2	98RE30	-4.221	25.26	-2.93772	7.37683	3.94768	13.5186	1.66088	-7.44187	32.9643	1.98568	-0.250341	-1.27074	-9.6004	0.605401	2021-09-30 02:28:03
1276	Session 2	98RE30	-4.221	25.26	-3.00656	7.24963	3.74383	13.5812	-5.73021	-7.51049	32.8345	1.85976	-0.258024	-0.956765	-16.5921	0.602315	2021-10-07 23:45:48
1388	Session 1	98RE30	-4.221	25.26	-3.55255	5.86066	1.87055	12.1845	-2.45358	-7.46715	32.8652	1.88961	-0.204274	0.423773	-10.0945	0.660093	2021-09-15 06:28:52
1680	Session 2	98RE30	-4.221	25.26	-2.967	7.34676	3.85543	13.0408	2.30742	-7.47194	32.9336	1.95594	-0.28258	-1.68196	-8.87197	0.567847	2021-09-28 01:23:15
1256	Session 2	98RE46A	-4.221	25.26	-3.21967	7.65477	3.93254	14.449	-3.52381	-7.75221	33.2489	2.26179	-0.244769	-0.90525	-14.9637	0.616983	2021-10-07 22:57:55
1698	Session 2	98RE46A	-4.221	25.26	-3.1997	7.69931	4.00555	13.6875	-3.72109	-7.73258	33.2944	2.3059	-0.23618	-1.74344	-15.2653	0.615075	2021-09-25 21:22:29
1471	Session 2	98RE46A	-4.221	25.26	-3.19657	7.64994	3.89768	14.3678	1.27878	-7.72744	33.2439	2.25695	-0.298676	-0.975634	-10.2314	0.56033	2021-10-12 15:14:05
1440	Session 2	98RE46A	-4.221	25.26	-3.21237	7.59422	3.85337	13.2439	-2.53016	-7.74221	33.187	2.20176	-0.27211	-1.97221	-13.8728	0.584335	2021-10-04 19:46:55
1373	Session 1	98RE46A	-4.221	25.26	-3.81122	6.17506	1.82031	14.114	1.18958	-7.75359	33.1867	2.20143	-0.293733	1.70455	-6.81426	0.558062	2021-09-14 21:04:37
1659	Session 2	98RE46A	-4.221	25.26	-3.22421	7.60137	3.80272	14.6553	-0.087559	-7.75508	33.1944	2.20887	-0.317274	-0.596168	-11.4592	0.530391	2021-09-28 00:32:34
1302	Session 2	98RE46A	-4.221	25.26	-3.24965	7.53139	3.77874	18.1566	-0.294808	-7.77959	33.1229	2.13958	-0.246579	2.99181	-11.5023	0.627624	2021-10-21 14:14:45
1785	Session 2	98RE46A	-4.221	25.26	-3.14294	7.72398	4.05188	13.7711	-0.484995	-7.67307	33.3195	2.33023	-0.272845	-1.71001	-12.1742	0.574327	2021-09-23 21:31:30
1257	Session 2	98RU30	-4.221	25.26	-2.93218	7.35204	3.9095	15.2396	-0.993106	-7.43507	32.9389	1.9611	-0.269914	0.474378	-12.1826	0.588759	2021-10-07 19:46:33
1465	Session 2	98RU30	-4.221	25.26	-2.94414	7.29282	3.85083	12.976	-4.48982	-7.44563	32.8784	1.90242	-0.258173	-1.6389	-15.5139	0.605463	2021-10-12 08:51:07
1696	Session 2	98RU30	-4.221	25.26	-2.90948	7.38809	3.97126	13.374	1.07489	-7.41223	32.9757	1.99678	-0.267067	-1.4355	-10.2314	0.581862	2021-09-25 18:06:23
1372	Session 1	98RU30	-4.221	25.26	-3.42068	6.14506	2.22674	13.2155	-1.86491	-7.33743	33.1552	2.17085	-0.263264	0.87682	-10.2	0.592174	2021-09-14 22:01:54
1331	Session 2	98RU30	-4.221	25.26	-2.84132	7.55899	4.20306	14.4729	1.02736	-7.34594	33.1502	2.16601	-0.273498	-0.691779	-10.6803	0.579947	2021-09-29 22:19:04
1410	Session 1	98RU30	-4.221	25.26	-3.43885	5.95072	2.06628	11.6724	9.30944	-7.34962	32.9569	1.97851	-0.214689	-0.261328	1.28042	0.643994	2021-09-13 23:41:22
1660	Session 2	98RU30	-4.221	25.26	-2.85924	7.5344	4.14245	13.5878	-12.9173	-7.36412	33.1251	2.14169	-0.291313	-1.51494	-24.3965	0.558195	2021-09-27 20:49:41
1784	Session 2	98RU30	-4.221	25.26	-2.86158	7.47466	4.08937	13.2204	-2.63125	-7.36442	33.0641	2.08247	-0.283464	-1.75843	-14.1127	0.562971	2021-09-23 18:11:07
1626	Session 2	98RU30	-4.221	25.26	-2.92163	7.31507	3.89402	13.548	-2.75385	-7.42248	32.9011	1.92443	-0.260165	-1.11921	-13.8637	0.608524	2021-10-19 14:04:19
1439	Session 2	98RU30	-4.221	25.26	-2.8171	7.56365	4.20452	13.4598	1.79274	-7.32034	33.1549	2.17058	-0.301637	-1.69894	-9.95855	0.551604	2021-10-04 16:36:43
1419	Session 1	98RU32	-4.221	25.26	-3.38314	5.74862	1.8801	11.8144	-4.18271	-7.283	32.7505	1.77832	-0.260647	0.280809	-11.7732	0.593464	2021-09-14 02:09:45
1279	Session 2	98RU32	-4.221	25.26	-2.812	7.16722	3.85554	14.4418	-2.5873	-7.30036	32.7498	1.77763	-0.267635	0.05514	-13.5301	0.59197	2021-10-08 06:33:11
1116	Session 5	98RU32	-4.221	25.26	-2.92066	7.1751	3.70784	14.7298	11.9505	-7.47748	32.7303	1.75875	-0.310018	0.323392	0.9491	0.575716	2023-11-24 12:47:13
1616	Session 2	98RU32	-4.221	25.26	-2.78396	7.26972	3.94532	14.6198	-0.566468	-7.27428	32.8545	1.87917	-0.307244	0.027037	-11.7587	0.555384	2021-10-20 06:33:32
1076	Session 5	98RU32	-4.221	25.26	-2.73185	7.07702	3.8365	14.0368	-11.0664	-7.27307	32.63	1.66144	-0.281498	-0.164975	-21.8279	0.606694	2023-11-20 17:43:33
1450	Session 2	98RU32	-4.221	25.26	-2.80463	7.10891	3.77626	13.7061	0.550326	-7.29037	32.6902	1.71983	-0.29733	-0.554392	-10.3221	0.556957	2021-10-05 04:00:35
1772	Session 2	98RU32	-4.221	25.26	-2.84992	7.2263	3.80627	13.1037	-3.29016	-7.34289	32.8103	1.83628	-0.335126	-1.38112	-14.2989	0.508588	2021-09-24 04:35:11
1317	Session 2	98RU32	-4.221	25.26	-2.83702	7.15001	3.81124	20.6072	0.710527	-7.32636	32.7323	1.76064	-0.269077	6.16749	-10.2088	0.601375	2021-10-21 13:26:46
1717	Session 2	98RU32	-4.221	25.26	-2.79893	7.1368	3.85926	13.2781	3.1876	-7.28533	32.7187	1.74745	-0.247775	-1.0317	-7.77355	0.603153	2021-09-26 05:18:22
1358	Session 2	98RU32	-4.221	25.26	-2.81486	6.98065	3.69057	21.198	4.24186	-7.29656	32.5592	1.59272	-0.246924	7.08866	-6.41123	0.609598	2021-09-30 09:32:06
897	Session 5	98RU32	-4.221	25.26	-2.88779	6.68365	3.16705	12.9763	64.6499	-7.4245	32.2298	1.27319	-0.40315	-0.429955	54.0489	0.474942	2023-11-28 11:11:49
1315	Session 2	98RU32	-4.221	25.26	-2.89274	6.94225	3.54934	14.3764	-0.408372	-7.37804	32.5201	1.55483	-0.269559	0.43757	-10.8557	0.601091	2021-10-21 17:43:01
1390	Session 1	98RU32	-4.221	25.26	-3.36475	5.73984	1.82561	12.5975	-2.08618	-7.26314	32.7415	1.76959	-0.325469	1.07243	-9.69514	0.522819	2021-09-15 01:36:18
1684	Session 2	98RU32	-4.221	25.26	-2.7835	7.24262	3.9286	14.0641	0.497311	-7.27279	32.8268	1.85231	-0.297947	-0.466886	-10.655	0.551627	2021-09-28 08:48:57
20	Session 4	99CH01	-4.221	25.26	-3.99371	7.47351	2.99106	15.1759	-3.99236	-8.66903	33.0029	2.02316	-0.204544	0.170429	-14.2627	0.684388	2022-07-24 13:29:02
234	Session 4	99CH01	-4.221	25.26	-3.98898	7.43648	2.78427	14.6922	-5.53033	-8.66262	32.965	1.98636	-0.379455	-0.232665	-15.7187	0.493555	2022-07-25 22:15:24
630	Session 4	99CH01	-4.221	25.26	-4.00789	7.44214	2.90074	15.0132	-6.83437	-8.683	32.9708	1.99203	-0.249287	0.072441	-17.0004	0.634894	2022-07-16 03:00:14
427	Session 4	99CH01	-4.221	25.26	-4.00739	7.44823	2.75145	15.2818	-8.53671	-8.68269	32.9771	1.99808	-0.404562	0.324988	-18.6974	0.471372	2022-07-18 23:31:08
238	Session 4	99CH01	-4.221	25.26	-4.01391	7.42557	2.78816	14.9776	-3.39485	-8.68882	32.9539	1.97559	-0.339114	0.07019	-13.5578	0.537011	2022-07-27 22:36:10
423	Session 4	99CH01	-4.221	25.26	-3.96684	7.62083	3.204	17.0864	-5.36018	-8.64579	33.1537	2.16943	-0.163841	1.75973	-15.9275	0.725686	2022-07-19 13:54:23
433	Session 4	99CH01	-4.221	25.26	-3.97752	7.54976	3.14753	15.9068	-10.5647	-8.65457	33.081	2.09886	-0.139723	0.739066	-20.9299	0.752069	2022-07-20 11:17:06
45	Session 4	99CH01	-4.221	25.26	-4.02013	7.46854	2.9102	14.9825	-7.54331	-8.69703	32.9979	2.01828	-0.252921	-0.010297	-17.7397	0.631455	2022-07-21 12:38:10
313	Session 4	99CH01	-4.221	25.26	-3.91856	7.69595	3.22918	15.2712	-14.5712	-8.59705	33.2305	2.24393	-0.262025	-0.177195	-25.2338	0.621955	2022-08-03 09:53:14
302	Session 4	99CH01	-4.221	25.26	-3.93212	7.64786	3.13002	14.995	-11.8934	-8.60975	33.1813	2.19619	-0.299887	-0.353822	-22.4792	0.579365	2022-08-01 21:43:31
352	Session 4	99CH01	-4.221	25.26	-3.98903	7.44481	2.86034	14.7554	-8.49927	-8.66299	32.9735	1.99464	-0.31169	-0.186908	-18.6731	0.566588	2022-07-29 23:56:05
348	Session 4	99CH01	-4.221	25.26	-3.98212	7.5151	2.96644	15.213	-7.03612	-8.6582	33.0455	2.06444	-0.281655	0.124421	-17.367	0.600177	2022-07-29 03:33:38
23	Session 4	99CH01	-4.221	25.26	-4.05588	7.24506	2.61128	14.4526	-2.68223	-8.72694	32.7691	1.79638	-0.295883	-0.088739	-12.4605	0.584951	2022-07-25 00:07:08
1115	Session 5	99CH03	-4.221	25.26	-5.12246	6.99527	1.28173	13.9795	-27.2955	-9.8127	32.5523	1.58602	-0.273338	-0.059172	-35.2614	0.616595	2023-11-24 17:15:32
134	Session 3	99CH03	-4.221	25.26	-5.07843	7.41984	1.72327	14.7853	-7.64426	-9.85075	32.8521	1.87688	-0.292493	-0.107905	-16.6322	0.585397	2022-06-28 00:47:16
526	Session 3	99CH03	-4.221	25.26	-5.15065	7.2221	1.4371	15.4187	-13.844	-9.92049	32.65	1.68078	-0.310332	0.909099	-22.3232	0.568231	2022-07-11 20:50:31
894	Session 5	99CH03	-4.221	25.26	-5.98931	4.94002	-1.59194	9.99467	-47.4171	-10.6593	30.4612	-0.442376	-0.239565	0.089265	-50.536	0.654463	2023-11-28 09:33:42
521	Session 3	99CH03	-4.221	25.26	-5.15505	7.20097	1.49988	14.645	-8.9143	-9.92441	32.6283	1.65982	-0.222475	0.18844	-17.3907	0.66865	2022-07-13 08:56:12
891	Session 5	99CH03	-4.221	25.26	-5.17045	6.97259	1.22173	14.0008	-20.3712	-9.86291	32.5293	1.56372	-0.261349	0.006816	-28.3008	0.628973	2023-11-29 23:15:28
407	Session 3	99CH03	-4.221	25.26	-5.11023	7.29893	1.56409	14.5434	-3.21755	-9.88022	32.7285	1.75694	-0.300432	-0.106251	-11.979	0.573179	2022-06-10 23:43:17
327	Session 4	99CH03	-4.221	25.26	-5.11121	7.2219	1.48627	14.2408	-16.4589	-9.85161	32.7479	1.77574	-0.301945	-0.251556	-24.9564	0.577877	2022-08-01 19:21:50
323	Session 4	99CH03	-4.221	25.26	-5.14341	7.19211	1.45899	14.3787	-15.7061	-9.88485	32.7174	1.74623	-0.26673	-0.056447	-24.1197	0.617537	2022-08-02 17:43:28
288	Session 3	99CH03	-4.221	25.26	-5.10747	7.35954	1.711	14.7601	-5.34937	-9.8795	32.7905	1.81709	-0.215802	-0.013016	-14.2115	0.662741	2022-06-15 17:49:29
563	Session 3	99CH03	-4.221	25.26	-5.10092	7.3634	1.66515	14.5562	-11.0667	-9.87266	32.7944	1.82091	-0.272122	-0.2216	-19.8922	0.610309	2022-07-07 23:45:41
326	Session 4	99CH03	-4.221	25.26	-5.12868	7.24254	1.49417	14.3999	-19.4594	-9.871	32.769	1.79629	-0.29609	-0.135769	-27.952	0.584294	2022-08-03 06:53:05
1077	Session 5	99CH03	-4.221	25.26	-4.87621	7.4177	1.96682	14.3796	115.237	-9.56628	32.9819	2.00278	-0.257046	-0.503377	104.901	0.633979	2023-11-21 01:38:57
218	Session 3	99CH03	-4.221	25.26	-5.08718	7.37259	1.76376	14.816	-17.6908	-9.85834	32.8038	1.83	-0.196918	0.01617	-26.489	0.692379	2022-07-04 16:03:16
403	Session 3	99CH03	-4.221	25.26	-5.09116	7.23872	1.58666	14.4845	-7.72505	-9.85767	32.6668	1.69715	-0.238941	-0.044805	-16.3515	0.637602	2022-06-11 10:10:47
287	Session 3	99CH03	-4.221	25.26	-5.13143	7.37112	1.62931	14.712	-10.0239	-9.90548	32.8024	1.82864	-0.283778	-0.083421	-18.8414	0.59158	2022-06-16 03:20:07
835	Session 5	99CH10	-4.221	25.26	-1.75589	8.29908	6.01149	16.679	-15.6307	-6.27985	33.8723	2.8665	-0.318661	0.011786	-29.6722	0.568494	2023-11-05 23:06:32
706	Session 5	99CH10	-4.221	25.26	-1.7925	8.20299	5.89568	16.4538	15.4624	-6.31526	33.7745	2.77165	-0.302257	-0.019171	1.20396	0.586973	2023-11-02 04:05:06
677	Session 5	99CH10	-4.221	25.26	-1.59402	8.63811	6.50909	17.219	61.2827	-6.12011	34.2172	3.20105	-0.321956	-0.129656	45.2726	0.567148	2023-10-26 23:46:33
1072	Session 5	99CH10	-4.221	25.26	-1.69793	8.35814	6.18537	16.5605	5.16364	-6.22037	33.9323	2.92471	-0.263343	-0.221954	-9.34985	0.624936	2023-11-20 23:32:26
715	Session 5	99CH10	-4.221	25.26	-1.81457	8.10643	5.80649	16.1475	32.7082	-6.3352	33.6763	2.67631	-0.273963	-0.128994	18.4233	0.617514	2023-11-01 06:42:19
1058	Session 5	99CH10	-4.221	25.26	-1.81844	8.17315	5.84266	16.4296	7.98581	-6.34176	33.7442	2.74224	-0.299063	0.016212	-6.08233	0.586876	2023-11-18 18:54:43
847	Session 5	99CH10	-4.221	25.26	-1.81615	8.18237	5.82574	16.4301	25.7013	-6.33966	33.7536	2.75134	-0.327236	-0.001556	11.3652	0.55988	2023-11-04 08:35:35
1103	Session 5	99CH10	-4.221	25.26	-1.49074	8.86022	6.89635	17.5374	59.5865	-6.0184	34.4432	3.42024	-0.260479	-0.256986	43.0355	0.627256	2023-11-24 18:58:37
1149	Session 5	99CH10	-4.221	25.26	-1.79146	8.15362	5.8849	16.2433	27.7744	-6.31235	33.7243	2.72288	-0.265921	-0.128377	13.4394	0.623629	2023-11-13 21:08:16
763	Session 5	99CH10	-4.221	25.26	-1.80577	8.25089	5.93565	16.5537	5.8384	-6.33113	33.8234	2.81901	-0.295514	-0.015959	-8.36345	0.593122	2023-11-07 05:40:47
1010	Session 5	99CH10	-4.221	25.26	-1.66314	8.4525	6.2517	16.9086	-50.1117	-6.18683	34.0284	3.01785	-0.325345	-0.066765	-64.0339	0.564825	2023-10-23 18:52:37
888	Session 5	99CH10	-4.221	25.26	-1.81675	8.14434	5.80048	16.2778	-5.82294	-6.33891	33.7149	2.71377	-0.314651	-0.075968	-19.6451	0.568389	2023-11-30 00:23:38
878	Session 5	99CH10	-4.221	25.26	-1.84983	8.1193	5.73195	16.5625	4.64718	-6.37318	33.6895	2.68911	-0.324165	0.253836	-9.23717	0.558553	2023-11-28 15:49:06
1154	Session 5	99CH10	-4.221	25.26	-1.79788	8.3177	6.0081	16.68	-7.63806	-6.32519	33.8914	2.88498	-0.296782	-0.024194	-21.7852	0.590114	2023-11-14 22:24:39
1107	Session 5	99CH10	-4.221	25.26	-1.7946	8.1979	5.88886	16.5395	8.72497	-6.31731	33.7694	2.76663	-0.301914	0.075212	-5.42679	0.582823	2023-11-25 20:29:57
1046	Session 5	99CH10	-4.221	25.26	-1.81052	8.29808	5.98236	16.641	-11.7746	-6.33791	33.8714	2.86563	-0.290184	-0.023647	-25.8124	0.596691	2023-11-17 15:14:05
1006	Session 5	99CH10	-4.221	25.26	-1.68839	8.40778	6.20355	16.7901	12.1471	-6.21204	33.9829	2.97373	-0.303509	-0.09459	-2.57384	0.587813	2023-10-24 11:08:58
324	Session 4	99CH14	-4.221	25.26	-3.51419	9.52326	5.3916	19.77	-10.6594	-8.23294	35.1007	4.05806	-0.30867	0.620824	-25.2636	0.568713	2022-07-31 20:47:53
248	Session 4	99CH14	-4.221	25.26	-3.5135	9.55854	5.37415	19.0814	-1.30974	-8.2335	35.1369	4.0931	-0.361075	-0.124714	-16.1203	0.512978	2022-07-26 00:43:41
892	Session 5	99CH14	-4.221	25.26	-3.59709	9.1068	4.94328	18.1988	5.67196	-8.26773	34.6992	3.66855	-0.263239	-0.096012	-8.2818	0.624827	2023-11-28 14:41:46
1	Session 4	99CH14	-4.221	25.26	-3.49312	9.47303	5.32951	19.0864	-5.36611	-8.20862	35.0492	4.00812	-0.343321	0.049662	-19.9748	0.53264	2022-07-24 23:10:44
333	Session 4	99CH14	-4.221	25.26	-3.50095	9.6312	5.48912	19.3162	-12.7073	-8.22278	35.2112	4.16524	-0.330484	-0.038228	-27.4994	0.544382	2022-07-30 03:05:32
329	Session 4	99CH14	-4.221	25.26	-3.51706	9.55466	5.35813	18.8254	-11.8359	-8.23715	35.1329	4.08925	-0.369543	-0.36821	-26.4793	0.499131	2022-08-03 01:15:24
1114	Session 5	99CH14	-4.221	25.26	-3.54368	9.28301	5.09085	18.5358	3.63727	-8.21738	34.8785	3.8425	-0.343326	-0.114314	-10.6843	0.538906	2023-11-24 22:18:02
362	Session 4	99CH14	-4.221	25.26	-3.52118	9.61411	5.54601	19.7536	-1.52485	-8.24373	35.1938	4.14832	-0.23634	0.424721	-16.4305	0.649509	2022-07-28 13:05:41
33	Session 4	99CH14	-4.221	25.26	-3.54188	9.46527	5.32255	19.1201	-2.59278	-8.26034	35.0414	4.00052	-0.292215	0.098078	-17.1761	0.588788	2022-07-24 02:10:36
1074	Session 5	99CH14	-4.221	25.26	-3.5722	9.21981	5.00967	18.3976	183.736	-8.2454	34.8142	3.78013	-0.333007	-0.12471	167.023	0.550458	2023-11-21 07:11:35
364	Session 4	99CH14	-4.221	25.26	-3.50525	9.59029	5.55182	19.1298	-5.14528	-8.22587	35.1693	4.12462	-0.223871	-0.140098	-19.9682	0.663449	2022-07-29 10:11:58
88	Session 3	99CH16	-4.221	25.26	-1.54912	8.62128	6.55707	17.317	-6.67286	-6.13139	34.0732	3.06137	-0.304287	5.5e-05	-21.6727	0.573471	2022-07-02 21:13:41
85	Session 3	99CH16	-4.221	25.26	-1.46632	8.8601	6.89719	18.115	-10.0124	-6.05187	34.3174	3.29821	-0.284758	0.310752	-25.5014	0.594718	2022-07-02 14:06:08
263	Session 3	99CH16	-4.221	25.26	-1.548	8.66405	6.65876	17.1995	-6.09689	-6.13176	34.117	3.10381	-0.246127	-0.200243	-21.1882	0.630281	2022-06-15 18:36:46
496	Session 3	99CH16	-4.221	25.26	-1.56405	8.59718	6.48643	17.6929	-6.21242	-6.14643	34.0486	3.03749	-0.335537	0.417436	-21.1577	0.541368	2022-07-13 05:44:00
346	Session 4	99CH16	-4.221	25.26	-1.60953	8.57351	6.38727	17.2174	-4.67825	-6.16671	34.1238	3.1104	-0.363984	-0.00309	-19.5537	0.507413	2022-07-29 07:46:59
387	Session 3	99CH16	-4.221	25.26	-1.55019	8.71384	6.67296	17.3473	-4.33761	-6.13593	34.1679	3.15324	-0.278281	-0.153677	-19.5484	0.595597	2022-06-11 06:09:30
200	Session 3	99CH16	-4.221	25.26	-1.50472	8.73756	6.69899	17.3162	-8.27234	-6.08832	34.1921	3.17668	-0.322516	-0.231251	-23.5156	0.554124	2022-07-04 19:25:19
301	Session 4	99CH16	-4.221	25.26	-1.55861	8.6622	6.58716	17.1849	-6.72535	-6.11566	34.2145	3.19839	-0.304472	-0.210901	-21.7925	0.571977	2022-08-03 04:28:11
543	Session 3	99CH16	-4.221	25.26	-1.5603	8.72434	6.62501	17.3408	-6.46439	-6.1471	34.1787	3.16368	-0.32568	-0.180815	-21.6521	0.551267	2022-07-07 21:21:42
380	Session 3	99CH16	-4.221	25.26	-1.5967	8.62798	6.48803	17.296	-1.81882	-6.18238	34.0802	3.06813	-0.33023	-0.033825	-16.8549	0.541261	2022-06-10 20:32:08
503	Session 3	99CH16	-4.221	25.26	-1.63493	8.50998	6.34205	17.3803	-3.70009	-6.2188	33.9595	2.9511	-0.320753	0.283022	-18.4421	0.557554	2022-07-12 00:05:31
305	Session 4	99CH16	-4.221	25.26	-1.65157	8.40779	6.28385	16.6972	-1.34325	-6.20545	33.9542	2.94589	-0.261788	-0.185986	-15.9067	0.620601	2022-08-02 20:09:18
269	Session 3	99CH16	-4.221	25.26	-1.54549	8.70648	6.61694	17.372	-1.4813	-6.13065	34.1604	3.14592	-0.33159	-0.114787	-16.7266	0.540597	2022-06-16 00:56:11
551	Session 3	99CH16	-4.221	25.26	-1.59764	8.59779	6.47142	17.1313	-3.28949	-6.18226	34.0493	3.03817	-0.316352	-0.135881	-18.2447	0.56238	2022-07-09 07:10:03
653	Session 5	99GR22	-4.221	25.26	-2.79148	8.26279	4.8338	16.7737	57.6472	-7.37996	33.8378	2.83296	-0.383572	0.176878	43.7885	0.501865	2023-10-26 06:55:56
1139	Session 5	99GR22	-4.221	25.26	-3.01247	8.03723	4.46073	16.1334	-2.00822	-7.60674	33.6086	2.61063	-0.306299	-0.005626	-14.4193	0.58045	2023-11-15 07:28:55
4	Session 4	99GR22	-4.221	25.26	-3.03669	8.25157	4.58868	16.2589	-11.5066	-7.67696	33.7974	2.79384	-0.362834	-0.307249	-24.1819	0.512116	2022-07-24 07:15:12
650	Session 5	99GR22	-4.221	25.26	-2.79254	8.50325	5.13448	17.4935	-1.00361	-7.3899	34.0827	3.07051	-0.31773	0.407645	-14.5545	0.571785	2023-10-27 02:35:41
223	Session 4	99GR22	-4.221	25.26	-2.99265	8.27404	4.72897	16.4694	-16.8601	-7.63082	33.8203	2.81606	-0.29071	-0.144818	-29.555	0.589908	2022-07-26 17:10:56
904	Session 5	99GR22	-4.221	25.26	-2.82982	8.39091	4.99449	17.4882	27.4869	-7.42544	33.9683	2.95962	-0.308924	0.625429	13.8119	0.580481	2023-10-29 05:53:19
827	Session 5	99GR22	-4.221	25.26	-3.01524	7.97501	4.34948	16.1528	25.4974	-7.60741	33.5452	2.54918	-0.353495	0.136905	12.8701	0.532094	2023-11-04 12:01:38
898	Session 5	99GR22	-4.221	25.26	-2.86987	8.27322	4.73794	16.6146	-5.47588	-7.46372	33.8486	2.84344	-0.408012	-0.000269	-18.4451	0.474768	2023-10-28 20:39:49
791	Session 5	99GR22	-4.221	25.26	-2.85023	8.29942	4.87646	19.1219	14.7742	-7.44379	33.8752	2.86928	-0.31606	2.41388	1.46876	0.570841	2023-11-09 23:13:09
11	Session 4	99GR22	-4.221	25.26	-3.09572	7.88971	4.24777	16.1479	2.2797	-7.72661	33.427	2.43454	-0.288305	0.301374	-9.81185	0.593297	2022-07-23 13:13:21
330	Session 4	99GR22	-4.221	25.26	-3.06987	7.89195	4.23992	15.3885	0.40171	-7.69913	33.4293	2.43671	-0.325043	-0.450538	-11.6988	0.5515	2022-07-29 07:01:01
6	Session 4	99GR22	-4.221	25.26	-3.02626	8.28009	4.71593	16.4003	-14.4404	-7.66688	33.8266	2.82215	-0.274813	-0.224732	-27.1431	0.607572	2022-07-24 20:52:53
748	Session 5	99GR22	-4.221	25.26	-3.04494	7.91991	4.25849	15.5921	-13.3096	-7.63697	33.4891	2.49481	-0.359614	-0.30563	-25.3234	0.525009	2023-11-06 23:22:05
786	Session 5	99GR22	-4.221	25.26	-3.05696	7.88329	4.22141	15.8162	4.07715	-7.64842	33.4519	2.45865	-0.348381	-0.012334	-8.06478	0.535843	2023-11-12 00:51:22
367	Session 4	99GR22	-4.221	25.26	-3.04365	7.99372	4.32633	15.6521	-10.9406	-7.6749	33.5334	2.53774	-0.365384	-0.392929	-23.1251	0.506165	2022-07-29 20:43:59
224	Session 4	99GR22	-4.221	25.26	-3.0332	8.1057	4.55413	16.2055	3.8081	-7.66787	33.648	2.64894	-0.258645	-0.070491	-8.7856	0.625181	2022-07-28 02:35:35
1050	Session 5	99GR22	-4.221	25.26	-3.03229	7.92682	4.3273	15.811	-16.7947	-7.62377	33.4962	2.5016	-0.310947	-0.103904	-28.7923	0.574769	2023-11-19 04:40:45
152	Session 3	Carrara	-4.221	25.26	6.19361	12.2552	17.9748	24.5239	11.7946	1.99174	37.7735	6.65064	-0.5304	-0.133416	-18.6153	0.327443	2022-06-23 05:37:49
127	Session 3	Carrara	-4.221	25.26	6.16492	12.198	17.9263	24.0486	0.137642	1.96324	37.715	6.59389	-0.493057	-0.484239	-29.7846	0.3674	2022-06-29 18:31:06
539	Session 3	Carrara	-4.221	25.26	6.1782	12.2601	17.9165	24.5101	5.10354	1.97513	37.7785	6.6555	-0.576648	-0.156567	-25.0985	0.272001	2022-07-08 23:33:58
117	Session 3	Carrara	-4.221	25.26	6.19328	12.265	17.9671	24.2025	4.72083	1.99103	37.7834	6.66031	-0.547139	-0.466347	-25.4945	0.30817	2022-06-30 19:26:07
199	Session 3	Carrara	-4.221	25.26	6.19095	12.2499	17.9442	24.2807	4.52867	1.9891	37.768	6.64529	-0.552567	-0.360166	-25.6499	0.300772	2022-07-04 21:01:05
382	Session 3	Carrara	-4.221	25.26	6.22836	12.369	18.0896	24.6365	13.0056	2.02462	37.8898	6.76347	-0.563804	-0.248336	-17.6938	0.295724	2022-06-11 11:51:57
591	Session 3	Carrara	-4.221	25.26	6.14152	12.1151	17.7664	24.0933	7.90908	1.94133	37.6302	6.51168	-0.545683	-0.276961	-22.0641	0.311356	2022-06-22 10:34:40
483	Session 3	Carrara	-4.221	25.26	6.18097	12.2373	17.8315	24.2771	10.726	1.97891	37.7552	6.63287	-0.640759	-0.338915	-19.6045	0.211267	2022-06-19 03:47:40
1299	Session 2	Carrara	-4.221	25.26	5.97938	11.8343	17.3271	21.0569	5.89208	1.88676	37.4984	6.38378	-0.538338	-2.68775	-23.321	0.285658	2021-10-21 09:21:17
456	Session 3	Carrara	-4.221	25.26	6.10109	12.0622	17.7231	24.2584	7.33552	1.90017	37.5761	6.45922	-0.495335	-0.011131	-22.4782	0.366389	2022-06-18 11:16:10
160	Session 3	Carrara	-4.221	25.26	6.16651	12.2067	17.86	24.3017	10.3565	1.96462	37.7238	6.60251	-0.568229	-0.254353	-19.8897	0.286673	2022-06-23 00:48:02
384	Session 3	Carrara	-4.221	25.26	6.21444	12.3351	18.0807	24.6621	11.2531	2.01102	37.8551	6.72985	-0.525336	-0.156384	-19.3142	0.336126	2022-06-11 02:05:16
606	Session 3	Carrara	-4.221	25.26	6.14414	12.1483	17.8102	23.9498	8.71853	1.9429	37.6642	6.54464	-0.537611	-0.482603	-21.3445	0.320473	2022-06-21 17:42:53
464	Session 3	Carrara	-4.221	25.26	6.16015	12.1907	17.8594	25.3878	11.0644	1.95842	37.7075	6.58661	-0.546789	0.837398	-19.1658	0.311829	2022-06-18 06:18:56
535	Session 3	Carrara	-4.221	25.26	6.17441	12.2447	17.8925	24.8203	12.1913	1.97165	37.7627	6.64023	-0.581339	0.176607	-18.1905	0.267147	2022-07-08 12:41:11
193	Session 3	Carrara	-4.221	25.26	6.14159	12.1556	17.7894	24.2442	5.31773	1.93992	37.6716	6.55182	-0.562399	-0.209542	-24.655	0.289513	2022-07-05 07:47:26
154	Session 3	Carrara	-4.221	25.26	6.16403	12.1495	17.8756	24.0497	9.30046	1.96408	37.6653	6.54571	-0.494833	-0.387361	-20.8027	0.365856	2022-06-23 12:16:55
264	Session 3	Carrara	-4.221	25.26	6.1312	12.1621	17.7524	24.7459	11.1099	1.9286	37.6783	6.55832	-0.594425	0.267281	-19.0372	0.262436	2022-06-16 06:20:28
79	Session 3	Carrara	-4.221	25.26	6.15535	12.1947	17.9056	24.4887	2.8233	1.95316	37.7116	6.59066	-0.500432	-0.048284	-27.1632	0.358733	2022-07-03 16:53:21
461	Session 3	Carrara	-4.221	25.26	6.12774	12.1143	17.8069	24.0961	8.16415	1.92667	37.6294	6.51093	-0.491019	-0.272665	-21.8008	0.370787	2022-06-19 09:32:11
581	Session 3	Carrara	-4.221	25.26	6.24088	12.4293	18.1609	27.4715	12.4925	2.03576	37.9514	6.82326	-0.56514	2.39847	-18.3192	0.291222	2022-06-21 06:07:33
210	Session 3	Carrara	-4.221	25.26	6.13969	12.1327	17.8254	24.0901	5.9648	1.93874	37.6482	6.52909	-0.502839	-0.314679	-23.9819	0.355503	2022-07-06 13:32:49
91	Session 3	Carrara	-4.221	25.26	6.11607	12.0569	17.7035	24.0469	-1.30831	1.91633	37.5707	6.45392	-0.524755	-0.207122	-30.8716	0.33234	2022-07-02 19:39:35
89	Session 3	Carrara	-4.221	25.26	6.15069	12.1494	17.8216	24.6731	5.58439	1.94985	37.6653	6.54573	-0.534181	0.221212	-24.3941	0.321763	2022-07-03 05:58:05
174	Session 3	Carrara	-4.221	25.26	6.20293	12.3307	18.0727	24.4547	2.48228	1.9989	37.8507	6.72551	-0.517116	-0.35	-27.7997	0.3416	2022-06-23 17:13:37
119	Session 3	Carrara	-4.221	25.26	6.23719	12.3717	18.0492	24.4064	9.03258	2.03394	37.8926	6.76616	-0.61509	-0.478195	-21.5607	0.234555	2022-06-27 23:10:44
266	Session 3	Carrara	-4.221	25.26	6.1737	12.2438	17.9395	24.4298	13.0054	1.97093	37.7618	6.6393	-0.533551	-0.202644	-17.3983	0.32678	2022-06-15 20:07:31
480	Session 3	Carrara	-4.221	25.26	6.15831	12.1971	17.8507	24.0928	5.35594	1.95623	37.7141	6.59305	-0.55972	-0.439475	-24.714	0.297785	2022-06-18 22:54:06
584	Session 3	Carrara	-4.221	25.26	6.19572	12.2646	17.9555	24.7362	7.02348	1.99364	37.783	6.65991	-0.560631	0.05523	-23.2629	0.29595	2022-06-21 10:56:40
580	Session 3	Carrara	-4.221	25.26	6.18232	12.2595	17.9292	24.3579	10.07	1.97955	37.7779	6.65491	-0.567832	-0.303896	-20.2845	0.287859	2022-06-21 22:38:17
541	Session 3	Carrara	-4.221	25.26	6.16376	12.2064	17.8362	24.1328	11.667	1.9617	37.7236	6.60227	-0.58852	-0.418761	-18.615	0.259496	2022-07-08 02:04:59
1292	Session 2	Carrara	-4.221	25.26	5.99345	11.9309	17.4276	22.2334	5.5051	1.8982	37.597	6.47947	-0.547752	-1.72922	-23.8944	0.273913	2021-10-22 07:13:55
583	Session 3	Carrara	-4.221	25.26	6.18072	12.2595	17.9563	24.4345	8.55669	1.97784	37.7779	6.65491	-0.539506	-0.229113	-21.7506	0.318146	2022-06-22 04:20:28
396	Session 3	Carrara	-4.221	25.26	6.15686	12.1708	17.8171	24.2032	9.43532	1.95564	37.6872	6.56694	-0.565682	-0.279685	-20.7051	0.29356	2022-06-14 12:24:29
465	Session 3	Carrara	-4.221	25.26	6.13835	12.1388	17.7448	23.9888	9.75841	1.93708	37.6545	6.53522	-0.586584	-0.425739	-20.3115	0.269824	2022-06-18 00:34:51
590	Session 3	Carrara	-4.221	25.26	6.20825	12.3108	18.0317	24.4126	10.8592	2.00531	37.8302	6.70572	-0.543501	-0.35175	-19.6435	0.314558	2022-06-21 00:25:54
466	Session 3	Carrara	-4.221	25.26	6.19308	12.3119	18.0659	24.5253	4.14241	1.98909	37.8314	6.70682	-0.495362	-0.243941	-26.144	0.366082	2022-06-19 15:56:27
161	Session 3	Carrara	-4.221	25.26	6.18243	12.2659	17.9558	24.4122	3.87352	1.97943	37.7844	6.66122	-0.547943	-0.263493	-26.3069	0.308773	2022-06-22 19:07:47
504	Session 3	Carrara	-4.221	25.26	6.10356	12.0802	17.7822	24.1638	3.71541	1.90214	37.5945	6.47707	-0.457268	-0.139018	-26.0278	0.405986	2022-07-12 14:17:31
1043	Session 5	Carrara	-4.221	25.26	5.99416	11.7645	17.2771	23.4732	36.1118	1.83613	37.3837	6.27252	-0.534731	-0.189664	6.14173	0.328128	2023-11-17 08:29:56
666	Session 5	Carrara	-4.221	25.26	6.25826	12.1675	17.8981	24.2897	172.126	2.10228	37.7935	6.67006	-0.586858	-0.188694	137.013	0.283799	2023-10-25 21:10:51
964	Session 5	Carrara	-4.221	25.26	6.18163	12.1041	17.8163	24.6686	68.6169	2.0231	37.7291	6.60757	-0.52704	0.306496	36.8166	0.353405	2023-10-17 03:11:06
1035	Session 5	Carrara	-4.221	25.26	5.96724	11.6514	17.1278	23.0928	53.0106	1.81163	37.2685	6.16086	-0.543986	-0.33777	22.8055	0.317788	2023-11-17 23:41:17
703	Session 5	Carrara	-4.221	25.26	6.01712	11.816	17.37	23.5886	51.4793	1.85867	37.4361	6.32335	-0.51708	-0.178727	20.9377	0.354824	2023-11-01 16:11:31
954	Session 5	Carrara	-4.221	25.26	6.15781	12.1437	17.8409	24.331	115.403	1.99631	37.7695	6.64677	-0.516924	-0.101384	82.1547	0.364476	2023-10-16 19:33:46
976	Session 5	Carrara	-4.221	25.26	6.10964	11.9302	17.5677	23.7468	143.853	1.95289	37.5522	6.43596	-0.528582	-0.249835	110.273	0.352346	2023-10-16 07:40:02
1040	Session 5	Carrara	-4.221	25.26	5.99717	11.81	17.2902	23.6338	30.1515	1.83766	37.43	6.31747	-0.569119	-0.122679	0.262243	0.290185	2023-11-18 16:40:36
955	Session 5	Carrara	-4.221	25.26	6.14074	12.0379	17.7194	23.8758	73.8348	1.98203	37.6618	6.54228	-0.515995	-0.336728	42.0583	0.366009	2023-10-15 11:04:48
979	Session 5	Carrara	-4.221	25.26	6.12373	11.9621	17.6586	23.576	29.2587	1.96671	37.5847	6.46749	-0.484792	-0.479813	-1.03385	0.399362	2023-10-14 19:33:54
838	Session 5	Carrara	-4.221	25.26	6.02689	11.8843	17.4267	23.7322	25.047	1.86655	37.5056	6.39078	-0.53765	-0.173352	-4.86904	0.330759	2023-11-05 11:49:02
1566	Session 1	Carrara	-4.221	25.26	5.37396	10.4166	15.3204	21.1016	6.7271	1.853	37.4941	6.37967	-0.513199	0.156626	-19.1842	0.320153	2021-09-07 02:59:32
1779	Session 2	Carrara	-4.221	25.26	6.10164	12.1518	17.769	21.3825	7.33293	2.00528	37.8225	6.69816	-0.53783	-2.9954	-22.6514	0.296892	2021-09-23 19:55:44
665	Session 5	Carrara	-4.221	25.26	6.34809	12.4157	18.2858	25.1596	63.6867	2.18874	38.0461	6.91506	-0.539164	0.169804	31.2272	0.334316	2023-10-26 10:00:12
1330	Session 2	Carrara	-4.221	25.26	6.03579	12.0257	17.5802	22.3975	8.22347	1.9398	37.6938	6.57336	-0.533316	-1.75603	-21.4796	0.298223	2021-09-30 15:25:56
830	Session 5	Carrara	-4.221	25.26	6.02188	11.8961	17.3959	23.8202	31.2077	1.8608	37.5177	6.40252	-0.574338	-0.110876	1.09404	0.291837	2023-11-04 21:11:35
303	Session 4	Carrara	-4.221	25.26	6.19285	12.2708	17.9405	24.2516	-1.72777	2.0189	37.8916	6.76523	-0.578431	-0.429831	-31.7596	0.256322	2022-08-02 23:12:42
1096	Session 5	Carrara	-4.221	25.26	6.08722	11.9806	17.5219	23.935	53.49	1.92719	37.6036	6.48584	-0.599583	-0.165774	22.4871	0.255864	2023-11-24 10:35:35
300	Session 4	Carrara	-4.221	25.26	6.13187	12.1252	17.8408	24.0185	-1.79306	1.9592	37.7427	6.62082	-0.472503	-0.369942	-31.4868	0.377683	2022-08-02 12:23:57
1223	Session 5	Carrara	-4.221	25.26	6.1833	12.2844	17.988	24.8627	-60.6746	2.01827	37.9127	6.78569	-0.535212	0.139644	-88.9479	0.344289	2023-10-17 19:05:33
1217	Session 5	Carrara	-4.221	25.26	6.1862	12.2679	17.8941	24.9567	558.381	2.02196	37.8959	6.76941	-0.614379	0.263885	511.518	0.259799	2023-10-18 02:51:40
1128	Session 5	Carrara	-4.221	25.26	6.04231	11.9009	17.4283	23.8526	28.9764	1.88235	37.5225	6.40721	-0.568081	-0.088761	-1.10299	0.292969	2023-11-15 06:21:40
1141	Session 5	Carrara	-4.221	25.26	6.016	11.8326	17.3748	23.7298	26.2427	1.85687	37.453	6.33976	-0.527292	-0.073595	-3.59673	0.337313	2023-11-14 14:57:24
1185	Session 5	Carrara	-4.221	25.26	6.18972	12.2041	17.8761	24.8256	1199.84	2.02804	37.8309	6.70638	-0.573696	0.262068	1133.94	0.300344	2023-10-21 05:21:51
1002	Session 5	Carrara	-4.221	25.26	6.16004	12.1271	17.8009	24.2619	-0.620024	1.99929	37.7526	6.63038	-0.542353	-0.136042	-30.3811	0.33311	2023-10-23 21:40:35
1532	Session 1	Carrara	-4.221	25.26	5.28322	10.095	14.9127	20.3301	5.91997	1.76833	37.1661	6.06153	-0.508719	0.037496	-19.263	0.316945	2021-09-11 20:18:48
1174	Session 5	Carrara	-4.221	25.26	6.20154	12.1347	17.8638	24.1957	200.823	2.04315	37.7602	6.63775	-0.530487	-0.215559	164.995	0.346692	2023-10-20 21:44:51
803	Session 5	Carrara	-4.221	25.26	5.99751	11.8146	17.2954	24.153	55.4551	1.83785	37.4347	6.32205	-0.568932	0.375326	24.8221	0.294764	2023-11-10 03:24:36
751	Session 5	Carrara	-4.221	25.26	5.97846	11.6613	17.1642	23.1322	41.4638	1.8232	37.2786	6.17065	-0.529422	-0.318948	11.5585	0.338358	2023-11-07 18:45:07
1198	Session 5	Carrara	-4.221	25.26	6.17549	12.1199	17.7816	24.0326	-32.9343	2.01599	37.7452	6.62322	-0.570221	-0.345678	-61.7354	0.304719	2023-10-20 14:02:20
1000	Session 5	Carrara	-4.221	25.26	6.16922	12.1536	17.8648	24.5118	-170.286	2.00809	37.7795	6.65649	-0.514704	0.055625	-195.044	0.362085	2023-10-24 09:01:38
801	Session 5	Carrara	-4.221	25.26	6.04533	11.8877	17.3508	23.8281	35.4501	1.88605	37.509	6.39408	-0.63445	-0.086384	5.20415	0.22397	2023-11-10 18:49:10
1694	Session 2	Carrara	-4.221	25.26	6.08081	12.1118	17.6855	21.9034	13.6684	1.98456	37.7817	6.65861	-0.559665	-2.40819	-16.4065	0.272264	2021-09-26 11:12:26
1175	Session 5	Carrara	-4.221	25.26	6.20154	12.233	17.9567	24.6577	-139.817	2.03956	37.8603	6.73491	-0.534709	0.041027	-165.641	0.342771	2023-10-20 04:37:12
1181	Session 5	Carrara	-4.221	25.26	6.18474	12.1714	17.8827	24.3024	56.041	2.02394	37.7977	6.67411	-0.530431	-0.184018	24.4775	0.34765	2023-10-19 20:55:30
794	Session 5	Carrara	-4.221	25.26	6.01189	11.8675	17.3918	23.7893	29.5186	1.85122	37.4885	6.37427	-0.540315	-0.084489	-0.479584	0.324582	2023-11-11 11:56:15
993	Session 5	Carrara	-4.221	25.26	6.20183	12.2408	17.9059	24.7663	-435.993	2.03957	37.8682	6.74257	-0.592466	0.131667	-452.934	0.278675	2023-10-24 21:49:57
1227	Session 5	Carrara	-4.221	25.26	6.22944	12.2751	18.0032	24.6637	61.2404	2.06768	37.9032	6.77644	-0.558524	-0.036287	29.2656	0.318262	2023-10-19 03:34:45
1143	Session 5	Carrara	-4.221	25.26	6.02275	11.8584	17.3621	23.7432	36.3899	1.8631	37.4792	6.36524	-0.571787	-0.111563	6.19776	0.289944	2023-11-13 23:23:16
758	Session 5	Carrara	-4.221	25.26	6.00355	11.827	17.3525	23.7173	32.9392	1.84383	37.4473	6.33422	-0.53092	-0.074647	2.92921	0.337178	2023-11-07 03:23:37
1216	Session 5	Carrara	-4.221	25.26	6.21576	12.2173	17.9417	24.3887	85.8759	2.05525	37.8443	6.71933	-0.548812	-0.190363	53.2924	0.32888	2023-10-18 19:49:53
1667	Session 2	Carrara	-4.221	25.26	6.11095	12.2236	17.8883	22.0667	6.10322	2.01255	37.8958	6.7693	-0.499846	-2.46903	-23.9901	0.33563	2021-09-28 14:50:07
1238	Session 5	Carrara	-4.221	25.26	6.15137	12.0067	17.6183	23.6313	-100.157	1.99447	37.63	6.51147	-0.595926	-0.513891	-126.742	0.279056	2023-10-18 12:06:32
1776	Session 2	Carrara	-4.221	25.26	6.10028	12.1197	17.7402	22.716	11.6557	2.00501	37.7897	6.6664	-0.533559	-1.63055	-18.3948	0.300823	2021-09-24 16:28:03
309	Session 4	Carrara	-4.221	25.26	6.07556	11.8899	17.5494	23.5084	2.52268	1.90777	37.5019	6.38722	-0.472525	-0.403125	-26.7968	0.37918	2022-08-01 10:47:17
1503	Session 1	Carrara	-4.221	25.26	5.37631	10.4437	15.3478	21.1157	9.48289	1.85451	37.5218	6.40648	-0.514946	0.116892	-16.5536	0.320618	2021-09-03 21:59:38
345	Session 4	Carrara	-4.221	25.26	6.1549	12.1911	17.908	24.2537	2.17299	1.98134	37.8101	6.6862	-0.494096	-0.270424	-27.7868	0.357305	2022-07-29 16:19:06
1434	Session 2	Carrara	-4.221	25.26	6.07504	12.0898	17.6533	22.0443	7.52121	1.97923	37.7592	6.63679	-0.564006	-2.22721	-22.3235	0.263086	2021-10-05 08:53:58
1376	Session 1	Carrara	-4.221	25.26	5.60838	10.9668	16.0889	22.3157	5.55991	2.08201	38.0551	6.92381	-0.532259	0.256218	-21.612	0.280023	2021-09-15 12:33:00
918	Session 5	Carrara	-4.221	25.26	6.19916	12.2689	17.9425	25.4563	67.097	2.03571	37.8969	6.77037	-0.581136	0.749504	34.9914	0.287673	2023-10-28 10:43:25
425	Session 4	Carrara	-4.221	25.26	6.17491	12.2111	17.8663	24.3791	2.93608	2.00195	37.8306	6.70604	-0.574965	-0.187669	-27.105	0.289953	2022-07-20 03:40:48
869	Session 5	Carrara	-4.221	25.26	6.15752	12.1748	17.8315	24.4132	18.4495	1.99487	37.8012	6.6775	-0.556073	-0.082551	-11.9684	0.300113	2023-11-29 11:13:34
429	Session 4	Carrara	-4.221	25.26	6.15938	12.1382	17.9208	24.56	-2.03276	1.98806	37.756	6.63366	-0.434785	0.133013	-31.772	0.439829	2022-07-19 16:52:01
1734	Session 2	Carrara	-4.221	25.26	6.04353	12.0587	17.6181	24.6688	16.7129	1.94683	37.7275	6.60604	-0.536096	0.396381	-13.3116	0.290669	2021-10-15 10:54:12
430	Session 4	Carrara	-4.221	25.26	6.14848	12.1476	17.7304	24.1599	8.76665	1.97609	37.7656	6.64299	-0.619627	-0.276092	-21.3009	0.245488	2022-07-19 05:07:00
1594	Session 2	Carrara	-4.221	25.26	6.03009	11.9534	17.5026	21.1598	14.1353	1.93638	37.6199	6.50171	-0.533527	-2.82201	-15.5978	0.302177	2021-09-18 14:53:28
620	Session 4	Carrara	-4.221	25.26	6.15342	12.174	17.8887	24.248	4.46183	1.98039	37.7926	6.66918	-0.494844	-0.24213	-25.5324	0.379437	2022-07-16 19:30:15
912	Session 5	Carrara	-4.221	25.26	6.19956	12.2976	18.0101	24.9738	71.0403	2.03508	37.9261	6.79868	-0.54296	0.22196	38.7579	0.328042	2023-10-28 22:31:53
732	Session 5	Carrara	-4.221	25.26	5.99744	11.8314	17.3772	23.8091	13.8203	1.83716	37.4518	6.33864	-0.504792	0.006122	-15.6363	0.355136	2023-12-01 02:57:03
629	Session 4	Carrara	-4.221	25.26	6.13505	12.1244	17.7092	24.0116	9.51156	1.96262	37.7419	6.62001	-0.604223	-0.375059	-20.5202	0.26799	2022-07-15 20:41:50
1598	Session 2	Carrara	-4.221	25.26	6.07278	12.0878	17.6852	21.3043	5.33115	1.9769	37.7571	6.63481	-0.528408	-2.94571	-24.4426	0.307815	2021-09-18 02:58:56
498	Session 3	Carrara	-4.221	25.26	6.15755	12.2498	17.8645	24.396	4.59558	1.95348	37.768	6.6453	-0.596439	-0.247534	-25.5504	0.248184	2022-07-13 01:12:56
1635	Session 2	Carrara	-4.221	25.26	6.0763	12.1583	17.7834	22.4152	3.84577	1.97806	37.8292	6.70469	-0.504032	-2.00022	-26.0209	0.325848	2021-10-20 08:57:59
699	Session 5	Carrara	-4.221	25.26	6.01524	11.8369	17.3804	23.6552	42.5864	1.8559	37.4573	6.344	-0.525188	-0.154924	12.2641	0.345663	2023-11-02 06:20:40
51	Session 4	Carrara	-4.221	25.26	6.08999	12.0218	17.654	23.9951	3.86741	1.91832	37.6369	6.51819	-0.512606	-0.188489	-25.7559	0.353713	2022-07-21 14:16:36
874	Session 5	Carrara	-4.221	25.26	5.99613	11.7306	17.2283	23.4288	27.3374	1.83946	37.3491	6.23904	-0.551796	-0.166037	-2.31522	0.30558	2023-11-28 18:05:15
755	Session 5	Carrara	-4.221	25.26	5.97582	11.7752	17.2995	23.4825	18.501	1.81623	37.3946	6.28313	-0.504362	-0.201719	-10.961	0.364793	2023-11-08 11:55:44
233	Session 4	Carrara	-4.221	25.26	6.1263	12.0734	17.6514	23.9633	12.2754	1.95515	37.6897	6.56935	-0.602482	-0.321393	-17.7322	0.245839	2022-07-26 03:16:00
840	Session 5	Carrara	-4.221	25.26	5.99488	11.8155	17.3101	23.5786	52.9079	1.83503	37.4357	6.32296	-0.5527	-0.187573	22.3498	0.315533	2023-11-04 06:22:18
1264	Session 2	Carrara	-4.221	25.26	6.07961	12.1162	17.6901	22.1422	2.48609	1.98313	37.7862	6.66299	-0.558217	-2.18378	-27.2641	0.268236	2021-10-08 11:26:01
349	Session 4	Carrara	-4.221	25.26	6.12832	12.1296	17.7641	24.3732	1.80751	1.95525	37.7472	6.62515	-0.548425	-0.03228	-27.9979	0.300275	2022-07-28 18:36:17
49	Session 4	Carrara	-4.221	25.26	6.15261	12.1609	17.751	24.4049	3.01715	1.98001	37.7792	6.65621	-0.616588	-0.063181	-26.9085	0.240515	2022-07-22 01:45:43
1499	Session 1	Carrara	-4.221	25.26	5.78433	11.399	16.7242	22.769	12.083	2.25321	38.4958	7.35129	-0.507979	-0.155375	-16.2754	0.329607	2021-09-02 17:18:47
1593	Session 2	Carrara	-4.221	25.26	6.08375	12.0899	17.6787	21.2103	9.80492	1.9885	37.7593	6.63687	-0.548029	-3.04158	-20.1167	0.286729	2021-09-20 20:12:43
16	Session 4	Carrara	-4.221	25.26	6.13448	12.1309	17.8595	24.2431	-2.84396	1.96177	37.7485	6.6264	-0.462268	-0.161767	-32.5197	0.401222	2022-07-24 15:42:54
237	Session 4	Carrara	-4.221	25.26	6.15268	12.2278	17.9277	24.4788	1.71115	1.97763	37.8477	6.72264	-0.508049	-0.123175	-28.3017	0.347709	2022-07-26 15:03:54
344	Session 4	Carrara	-4.221	25.26	6.09973	11.9146	17.4932	23.8247	19.3428	1.93264	37.5271	6.41167	-0.576461	-0.142992	-10.5414	0.267585	2022-07-29 05:47:47
13	Session 4	Carrara	-4.221	25.26	6.12924	12.1035	17.699	24.254	1.34434	1.95718	37.7205	6.59924	-0.587929	-0.097103	-28.399	0.266139	2022-07-24 05:13:22
1094	Session 5	Carrara	-4.221	25.26	6.02441	11.8162	17.3621	23.6531	38.3591	1.86641	37.4362	6.3235	-0.532401	-0.116019	8.19056	0.327878	2023-11-25 01:36:18
659	Session 5	Carrara	-4.221	25.26	6.22386	12.2669	17.8879	24.7259	98.9027	2.06206	37.8948	6.76835	-0.65809	0.040618	65.8165	0.206891	2023-10-26 21:55:59
18	Session 4	Carrara	-4.221	25.26	6.21427	12.2994	18.0441	24.8385	6.02954	2.04069	37.9209	6.79362	-0.526443	0.086382	-24.312	0.33417	2022-07-23 17:59:20
920	Session 5	Carrara	-4.221	25.26	6.16773	12.2276	17.8966	24.9649	63.1072	2.00379	37.8549	6.72968	-0.553937	0.351532	31.2386	0.317251	2023-10-27 22:12:04
1470	Session 2	Carrara	-4.221	25.26	6.02382	11.9966	17.5491	22.293	7.31309	1.92812	37.6641	6.54458	-0.523387	-1.80074	-22.2956	0.306144	2021-10-12 05:07:52
44	Session 4	Carrara	-4.221	25.26	6.12683	12.1078	17.7224	24.3294	7.63288	1.95446	37.7248	6.60347	-0.566641	-0.03191	-22.3029	0.292521	2022-07-22 12:41:02
1513	Session 1	Carrara	-4.221	25.26	5.43819	10.5015	15.4558	21.1862	11.7721	1.91815	37.5807	6.46362	-0.528381	0.071325	-14.499	0.309674	2021-09-02 05:22:51
846	Session 5	ETH-1	-4.221	25.26	6.05361	11.2128	16.675	22.3225	43.33	1.91955	36.8217	5.72742	-0.651439	-0.223805	14.1738	0.209794	2023-11-04 10:53:48
762	Session 5	ETH-1	-4.221	25.26	6.05385	11.1354	16.6358	22.312	37.9492	1.92264	36.7429	5.65094	-0.614989	-0.080927	9.09481	0.247099	2023-11-07 07:57:44
849	Session 5	ETH-1	-4.221	25.26	6.03102	11.1202	16.4374	22.1259	16.019	1.89892	36.7274	5.63596	-0.771868	-0.232892	-12.1726	0.081405	2023-11-03 13:49:11
96	Session 3	ETH-1	-4.221	25.26	6.20067	11.5553	17.2408	23.1242	2.94351	2.02495	37.0573	5.95593	-0.578827	-0.117168	-25.8844	0.272493	2022-07-03 08:51:49
707	Session 5	ETH-1	-4.221	25.26	6.06862	11.1545	16.677	22.3425	73.6081	1.93764	36.7623	5.66979	-0.608191	-0.088956	43.7074	0.256868	2023-11-02 10:56:11
857	Session 5	ETH-1	-4.221	25.26	6.08998	11.3028	16.8448	23.1464	14.7599	1.95494	36.9133	5.81623	-0.609281	0.403924	-13.8084	0.254004	2023-11-05 16:20:27
1051	Session 5	ETH-1	-4.221	25.26	6.03458	11.1928	16.6305	22.3351	16.028	1.90004	36.8014	5.70771	-0.656246	-0.171967	-12.307	0.197052	2023-11-18 04:41:12
810	Session 5	ETH-1	-4.221	25.26	6.04017	11.1635	16.5117	24.877	-49.6024	1.90706	36.7715	5.67873	-0.750344	2.37216	-76.0599	0.100691	2023-11-09 15:07:08
164	Session 3	ETH-1	-4.221	25.26	6.19635	11.5707	17.1359	23.3726	8.65464	2.01978	37.073	5.97119	-0.692411	0.095244	-20.3622	0.152495	2022-06-22 23:52:46
735	Session 5	ETH-1	-4.221	25.26	6.07991	11.3259	16.6785	22.512	-6.07225	1.94338	36.9368	5.83911	-0.784923	-0.262167	-34.0872	0.052742	2023-12-01 07:23:00
171	Session 3	ETH-1	-4.221	25.26	6.1566	11.341	16.8949	22.8299	8.8982	1.98581	36.8381	5.74334	-0.665444	0.018868	-19.647	0.18153	2022-06-23 01:36:03
887	Session 5	ETH-1	-4.221	25.26	6.0594	11.124	16.6222	22.2328	24.8483	1.92895	36.7313	5.63969	-0.623009	-0.135882	-3.62567	0.228477	2023-11-29 15:56:46
172	Session 3	ETH-1	-4.221	25.26	6.24959	11.682	17.3212	23.822	6.61967	2.07246	37.1868	6.08154	-0.673063	0.314304	-22.6051	0.172965	2022-06-23 06:23:55
175	Session 3	ETH-1	-4.221	25.26	6.25023	11.679	17.4043	23.1804	6.6984	2.07326	37.1837	6.07859	-0.589133	-0.306736	-22.5237	0.263585	2022-06-23 13:08:02
879	Session 5	ETH-1	-4.221	25.26	5.9984	10.9357	16.3915	21.4548	73.9858	1.87097	36.5396	5.45374	-0.604229	-0.524544	44.5965	0.249374	2023-11-28 23:08:09
155	Session 3	ETH-1	-4.221	25.26	6.24985	11.6733	17.4057	23.3583	7.66945	2.07305	37.1779	6.07295	-0.581848	-0.121666	-21.5696	0.271284	2022-06-23 18:03:15
176	Session 3	ETH-1	-4.221	25.26	6.05382	11.1285	16.6141	21.9226	6.45448	1.88401	36.6209	5.53262	-0.629527	-0.448111	-21.5111	0.219267	2022-06-24 15:28:01
881	Session 5	ETH-1	-4.221	25.26	6.00749	11.098	16.5877	23.1236	-112.115	1.87469	36.7049	5.61412	-0.578453	0.786907	-136.692	0.277872	2023-11-27 14:03:45
1110	Session 5	ETH-1	-4.221	25.26	6.05504	11.1336	16.6987	22.1548	36.4693	1.92397	36.741	5.64911	-0.552584	-0.231039	7.6584	0.305882	2023-11-25 22:43:20
1102	Session 5	ETH-1	-4.221	25.26	6.04257	11.1559	16.6734	22.1582	12.9429	1.90989	36.7637	5.67118	-0.586336	-0.271813	-15.2436	0.269988	2023-11-25 06:36:40
770	Session 5	ETH-1	-4.221	25.26	6.10655	11.228	16.6942	22.2913	38.5622	1.9753	36.837	5.74225	-0.701583	-0.284187	9.45286	0.153229	2023-11-08 16:29:26
1101	Session 5	ETH-1	-4.221	25.26	6.02336	11.046	16.4771	21.9263	66.0463	1.89348	36.6519	5.56269	-0.65291	-0.281465	36.6244	0.198788	2023-11-24 15:00:19
1071	Session 5	ETH-1	-4.221	25.26	6.0316	11.1566	16.5613	22.2156	60.7772	1.89819	36.7645	5.67196	-0.686095	-0.217247	31.27	0.163642	2023-11-21 09:52:48
1073	Session 5	ETH-1	-4.221	25.26	6.32452	11.8556	17.6845	23.9541	-1.87793	2.18416	37.4757	6.36181	-0.561568	0.099955	-31.2597	0.297646	2023-11-20 15:22:55
1059	Session 5	ETH-1	-4.221	25.26	6.05279	11.0877	16.5829	22.1939	33.5394	1.92325	36.6943	5.60381	-0.61951	-0.10213	4.90196	0.236113	2023-11-18 21:12:34
1047	Session 5	ETH-1	-4.221	25.26	6.02081	10.9604	16.4299	21.8147	66.4508	1.8939	36.5647	5.47812	-0.613512	-0.221241	37.1932	0.243587	2023-11-17 12:59:14
1155	Session 5	ETH-1	-4.221	25.26	6.10593	11.3703	16.9214	22.6987	-6.62097	1.96943	36.9819	5.88284	-0.615887	-0.167219	-34.7302	0.241611	2023-11-15 10:55:42
1146	Session 5	ETH-1	-4.221	25.26	6.05357	11.1347	16.641	22.2888	23.4451	1.92237	36.7421	5.65024	-0.608966	-0.102265	-5.00436	0.250121	2023-11-14 03:52:30
97	Session 3	ETH-1	-4.221	25.26	6.18225	11.4711	17.0797	23.32	1.0722	2.00839	36.9712	5.87241	-0.636471	0.240654	-27.5239	0.210076	2022-07-02 12:30:40
1150	Session 5	ETH-1	-4.221	25.26	5.98427	11.0307	16.3107	22.0476	61.7441	1.85246	36.6364	5.5477	-0.761614	-0.132523	32.5144	0.086741	2023-11-13 13:07:04
815	Session 5	ETH-1	-4.221	25.26	6.07214	11.1219	16.6051	22.2277	42.0311	1.94259	36.7291	5.63757	-0.650795	-0.136675	13.0702	0.206049	2023-11-11 16:28:16
809	Session 5	ETH-1	-4.221	25.26	6.01914	11.1867	16.5854	22.359	15.1146	1.88384	36.7951	5.70165	-0.678767	-0.13631	-13.167	0.176588	2023-11-11 00:01:54
807	Session 5	ETH-1	-4.221	25.26	6.0441	11.132	16.6192	22.6468	52.6543	1.91239	36.7394	5.6476	-0.61805	0.253253	23.4085	0.24216	2023-11-10 08:04:19
95	Session 3	ETH-1	-4.221	25.26	6.19214	11.4823	17.0643	24.8731	0.326012	2.01852	36.9826	5.88352	-0.672604	1.73652	-28.2801	0.169811	2022-07-02 22:51:57
1104	Session 5	ETH-1	-4.221	25.26	6.01757	11.0764	16.5	22.2564	39.8978	1.8862	36.6828	5.5927	-0.653935	-0.018549	11.1441	0.198243	2023-11-23 22:49:50
100	Session 3	ETH-1	-4.221	25.26	6.18493	11.4887	17.0829	22.8974	0.985074	2.0106	36.9892	5.88989	-0.653212	-0.207193	-27.6446	0.189908	2022-07-03 20:32:57
1011	Session 5	ETH-1	-4.221	25.26	6.19137	11.466	16.9549	23.0422	29.7974	2.0568	37.0792	5.9772	-0.763447	-0.020724	0.380998	0.097975	2023-10-23 13:13:41
714	Session 5	ETH-1	-4.221	25.26	6.06082	11.2323	16.6688	22.4025	21.1182	1.9265	36.8415	5.74667	-0.683931	-0.184108	-7.46249	0.176739	2023-11-01 05:34:15
975	Session 5	ETH-1	-4.221	25.26	6.21678	11.5832	17.1675	23.4054	-95.1613	2.07954	37.1986	6.09299	-0.694506	0.102345	-121.232	0.175741	2023-10-16 20:29:52
977	Session 5	ETH-1	-4.221	25.26	6.17825	11.2885	16.8716	22.155	1.65239	2.04934	36.8985	5.80192	-0.659483	-0.537221	-26.6109	0.213475	2023-10-15 18:46:23
966	Session 5	ETH-1	-4.221	25.26	6.20692	11.4753	17.1129	22.7248	261.085	2.073	37.0886	5.98633	-0.633205	-0.349274	225.02	0.241835	2023-10-14 14:26:51
969	Session 5	ETH-1	-4.221	25.26	6.17964	11.3962	16.9495	22.6005	5.21217	2.04688	37.0082	5.90834	-0.689005	-0.314605	-23.3575	0.182807	2023-10-14 01:30:37
547	Session 3	ETH-1	-4.221	25.26	6.19671	11.4872	17.0913	23.1556	9.80959	2.02322	36.9876	5.88836	-0.655588	0.048152	-19.0818	0.184265	2022-07-08 05:21:15
971	Session 5	ETH-1	-4.221	25.26	6.16763	11.3766	16.9259	22.6491	129.779	2.03482	36.9882	5.88893	-0.680807	-0.228194	97.7254	0.191592	2023-10-13 20:21:40
320	Session 4	ETH-1	-4.221	25.26	6.19347	11.5169	17.1297	22.7908	2.88501	2.04721	37.1197	6.01646	-0.643375	-0.367104	-25.8612	0.182488	2022-08-03 02:54:14
317	Session 4	ETH-1	-4.221	25.26	6.16279	11.4433	17.1222	22.6288	-0.348307	2.01719	37.0443	5.94339	-0.547718	-0.379915	-28.8313	0.292837	2022-08-02 15:17:18
314	Session 4	ETH-1	-4.221	25.26	6.17786	11.4604	17.1228	22.7489	4.40211	2.03264	37.0618	5.96031	-0.579221	-0.296312	-24.2642	0.258951	2022-08-01 14:57:42
166	Session 3	ETH-1	-4.221	25.26	6.22151	11.6008	17.2611	23.0596	0.409297	2.04549	37.1038	6.00108	-0.62455	-0.270351	-28.4532	0.226051	2022-06-22 19:54:40
356	Session 4	ETH-1	-4.221	25.26	6.14785	11.3532	16.9046	22.4391	8.30277	2.00456	36.9521	5.85394	-0.658794	-0.3873	-20.2397	0.175744	2022-07-29 08:34:43
355	Session 4	ETH-1	-4.221	25.26	6.16324	11.367	16.9147	22.4024	10.1171	2.02048	36.9662	5.86762	-0.678013	-0.450449	-18.5191	0.156311	2022-07-28 22:49:31
240	Session 4	ETH-1	-4.221	25.26	6.20634	11.5394	17.1146	22.7342	-2.91748	2.06012	37.1426	6.03872	-0.693226	-0.466784	-31.5528	0.142906	2022-07-27 21:55:43
978	Session 5	ETH-1	-4.221	25.26	6.22547	11.6233	17.1765	23.7232	-79.8344	2.08731	37.2393	6.13252	-0.733496	0.333789	-106.425	0.134237	2023-10-16 22:21:23
241	Session 4	ETH-1	-4.221	25.26	6.19498	11.5017	17.1034	22.8574	0.014269	2.04937	37.1041	6.00137	-0.655977	-0.271997	-28.6225	0.186581	2022-07-26 07:46:50
25	Session 4	ETH-1	-4.221	25.26	6.17498	11.4557	16.987	22.7068	4.7886	2.02974	37.057	5.95571	-0.705176	-0.328262	-23.877	0.138352	2022-07-24 07:59:52
21	Session 4	ETH-1	-4.221	25.26	6.13613	11.3325	16.85	22.4608	1.86192	1.99282	36.931	5.83342	-0.680263	-0.325227	-26.4471	0.167496	2022-07-23 22:14:59
62	Session 4	ETH-1	-4.221	25.26	6.10544	11.2632	16.8585	22.5804	7.9269	1.96263	36.8601	5.76467	-0.573194	-0.071265	-20.3898	0.285032	2022-07-22 16:22:21
55	Session 4	ETH-1	-4.221	25.26	6.14886	11.4459	17.0441	23.238	0.895674	2.00224	37.047	5.946	-0.612758	0.210411	-27.6134	0.24589	2022-07-21 18:39:01
56	Session 4	ETH-1	-4.221	25.26	6.14647	11.3774	16.9174	28.6756	0.641353	2.0022	36.9769	5.87794	-0.668217	5.66188	-27.7285	0.188645	2022-07-20 18:39:25
440	Session 4	ETH-1	-4.221	25.26	6.20273	11.521	17.1126	24.0672	2.34558	2.05694	37.1238	6.0205	-0.673623	0.872286	-26.4024	0.184262	2022-07-20 07:23:46
555	Session 3	ETH-1	-4.221	25.26	6.18766	11.531	17.1177	22.7411	5.25816	2.01196	37.0325	5.93189	-0.662959	-0.443657	-23.5768	0.174664	2022-07-09 03:13:45
633	Session 4	ETH-1	-4.221	25.26	6.17095	11.4097	16.9668	22.6026	5.22862	2.02713	37.0099	5.90999	-0.676219	-0.339072	-23.358	0.188508	2022-07-16 23:21:16
626	Session 4	ETH-1	-4.221	25.26	6.15928	11.3848	17.0081	26.7424	5.51555	2.0156	36.9845	5.88532	-0.599433	3.75719	-23.0199	0.270706	2022-07-16 11:19:07
513	Session 3	ETH-1	-4.221	25.26	6.14329	11.386	16.9137	24.4808	7.06708	1.96996	36.8842	5.78808	-0.67709	1.54372	-21.4982	0.158308	2022-07-11 19:10:45
637	Session 4	ETH-1	-4.221	25.26	6.17973	11.4997	17.0283	22.8873	4.75875	2.03318	37.102	5.99936	-0.712107	-0.238729	-23.9942	0.154474	2022-07-16 01:22:42
517	Session 3	ETH-1	-4.221	25.26	6.17204	11.4589	16.9838	23.1501	4.33728	1.99795	36.9588	5.86037	-0.708465	0.098641	-24.3185	0.120687	2022-07-13 04:54:04
511	Session 3	ETH-1	-4.221	25.26	6.17699	11.4565	17.1012	23.1977	8.38459	2.00332	36.9563	5.85798	-0.595785	0.149907	-20.3872	0.249108	2022-07-12 17:08:11
30	Session 4	ETH-1	-4.221	25.26	6.12163	11.2922	16.8652	22.3941	6.43485	1.97883	36.8898	5.79346	-0.611365	-0.310797	-21.9118	0.238474	2022-07-24 19:13:59
970	Session 5	ETH-1	-4.221	25.26	6.22593	11.6045	17.2118	24.0267	-598.186	2.08849	37.2202	6.11399	-0.681033	0.667442	-609.783	0.1897	2023-10-17 04:07:53
1232	Session 5	ETH-1	-4.221	25.26	6.19618	11.5317	17.1707	23.2187	19.4562	2.05951	37.1462	6.04215	-0.620234	0.021768	-9.79632	0.254078	2023-10-17 12:21:06
1229	Session 5	ETH-1	-4.221	25.26	6.22429	11.6433	17.236	23.6285	267.16	2.08532	37.2598	6.15234	-0.693266	0.201518	230.497	0.17621	2023-10-17 20:03:56
933	Session 5	ETH-1	-4.221	25.26	6.24606	11.6166	17.3103	24.0284	47.979	2.10946	37.2325	6.12588	-0.616612	0.645188	17.6865	0.249218	2023-10-29 02:18:25
926	Session 5	ETH-1	-4.221	25.26	6.2459	11.6458	17.355	27.8249	53.6234	2.10822	37.2622	6.15471	-0.600876	4.29711	23.1099	0.267017	2023-10-28 01:58:36
928	Session 5	ETH-1	-4.221	25.26	6.20974	11.5536	17.0693	23.2292	149338	2.07313	37.1684	6.06369	-0.754941	-0.011083	145016	0.10307	2023-10-27 13:38:34
207	Session 3	ETH-1	-4.221	25.26	6.2457	11.6477	17.2556	23.5599	4.24461	2.06957	37.1517	6.04753	-0.700171	0.125932	-24.8422	0.136984	2022-07-05 00:22:30
679	Session 5	ETH-1	-4.221	25.26	6.2643	11.5848	17.2747	23.2347	56.2838	2.13002	37.2001	6.09445	-0.639459	-0.067597	25.7947	0.226683	2023-10-27 01:40:31
673	Session 5	ETH-1	-4.221	25.26	6.23671	11.6404	17.2607	23.284	149.789	2.09864	37.2568	6.14945	-0.678951	-0.129343	116.513	0.185102	2023-10-26 13:21:47
671	Session 5	ETH-1	-4.221	25.26	6.22851	11.6039	17.293	23.5847	76.994	2.09125	37.2196	6.11338	-0.603286	0.236695	45.908	0.266244	2023-10-26 01:15:39
209	Session 3	ETH-1	-4.221	25.26	6.26135	11.6868	17.4174	24.8106	0.307558	2.08482	37.1917	6.08632	-0.595261	1.27053	-28.7552	0.252898	2022-07-05 14:17:44
674	Session 5	ETH-1	-4.221	25.26	6.26545	11.6095	17.2039	24.0523	69.7012	2.13034	37.2252	6.1188	-0.734114	0.682669	38.7738	0.127164	2023-10-25 12:46:32
1016	Session 5	ETH-1	-4.221	25.26	6.2679	11.6872	17.3532	23.8214	95.8508	2.1301	37.3044	6.19561	-0.665506	0.303263	64.0039	0.200649	2023-10-25 01:33:21
1007	Session 5	ETH-1	-4.221	25.26	6.21806	11.5599	17.1748	23.0653	-38.3701	2.08175	37.1748	6.06996	-0.666074	-0.183932	-66.0361	0.200634	2023-10-24 13:33:30
1009	Session 5	ETH-1	-4.221	25.26	6.21803	11.5464	17.1331	22.9084	52.1813	2.08222	37.1611	6.05661	-0.693825	-0.310487	21.937	0.17155	2023-10-24 01:34:29
509	Session 3	ETH-1	-4.221	25.26	6.17663	11.5071	17.1098	22.916	6.55756	2.00107	37.0081	5.90819	-0.636147	-0.22547	-22.2579	0.203953	2022-07-12 07:06:10
1191	Session 5	ETH-1	-4.221	25.26	6.26258	11.5851	17.203	23.6418	313.061	2.12818	37.2004	6.09474	-0.708404	0.3297	275.162	0.156834	2023-10-21 06:18:37
1200	Session 5	ETH-1	-4.221	25.26	6.27203	11.6813	17.3673	24.1479	107.826	2.13471	37.2983	6.18976	-0.650137	0.633965	75.6386	0.219157	2023-10-21 00:36:53
1196	Session 5	ETH-1	-4.221	25.26	6.26058	11.6297	17.3316	23.3475	16.4336	2.12442	37.2458	6.13879	-0.623292	-0.046018	-12.9874	0.24783	2023-10-20 22:43:25
1177	Session 5	ETH-1	-4.221	25.26	6.25233	11.6717	17.3416	23.4176	-69.8325	2.1141	37.2886	6.18033	-0.645866	-0.060631	-96.8224	0.224144	2023-10-20 15:00:05
208	Session 3	ETH-1	-4.221	25.26	6.19128	11.4989	17.1532	23.4545	3.83591	2.017	36.9996	5.89995	-0.600493	0.317245	-24.9011	0.246569	2022-07-06 17:15:02
1199	Session 5	ETH-1	-4.221	25.26	6.23839	11.646	17.3136	23.6631	-223.838	2.10023	37.2624	6.15491	-0.634035	0.230164	-246.31	0.236912	2023-10-20 07:31:59
1197	Session 5	ETH-1	-4.221	25.26	6.2448	11.6587	17.3279	23.4324	-99.0661	2.10658	37.2753	6.16742	-0.638945	-0.020314	-125.179	0.231773	2023-10-20 05:35:49
1187	Session 5	ETH-1	-4.221	25.26	6.25358	11.6977	17.4313	23.4699	-524.57	2.11449	37.315	6.20596	-0.584233	-0.060826	-538.389	0.290346	2023-10-19 21:53:13
1190	Session 5	ETH-1	-4.221	25.26	6.18436	11.4983	16.9978	19.8789	134.323	2.04816	37.1121	6.0091	-0.745496	-3.17627	101.86	0.118961	2023-10-19 16:11:10
1192	Session 5	ETH-1	-4.221	25.26	6.21388	11.6345	17.2147	23.6561	45.9441	2.07457	37.2508	6.14365	-0.695027	0.24597	15.7097	0.172756	2023-10-19 14:18:20
1231	Session 5	ETH-1	-4.221	25.26	6.29229	11.6685	17.3405	23.4405	-1307.51	2.15672	37.2853	6.17708	-0.684758	-0.031913	-1298.58	0.183911	2023-10-19 04:31:55
1240	Session 5	ETH-1	-4.221	25.26	6.27975	11.7033	17.3975	23.7152	164.328	2.14211	37.3207	6.21146	-0.649701	0.167678	130.442	0.221425	2023-10-18 22:36:48
1236	Session 5	ETH-1	-4.221	25.26	6.24382	11.6882	17.3101	23.3192	-1.75761	2.10445	37.3054	6.19661	-0.684073	-0.189312	-30.745	0.184953	2023-10-18 20:43:48
1220	Session 5	ETH-1	-4.221	25.26	6.25271	11.6833	17.2979	23.2987	86.0331	2.11409	37.3004	6.19177	-0.700395	-0.199686	54.4965	0.167912	2023-10-18 13:02:22
1239	Session 5	ETH-1	-4.221	25.26	6.23238	11.6491	17.2743	23.8592	733.705	2.09372	37.2656	6.15804	-0.66959	0.415516	683.51	0.200931	2023-10-18 05:41:34
1237	Session 5	ETH-1	-4.221	25.26	6.20611	11.5924	17.1683	23.7424	73.8072	2.06785	37.208	6.1021	-0.691705	0.41349	42.8611	0.177504	2023-10-18 03:46:45
711	Session 5	ETH-1	-4.221	25.26	6.02356	11.1249	16.5218	22.2989	54.1414	1.89081	36.7322	5.64061	-0.685767	-0.072937	24.8907	0.174406	2023-11-01 20:21:08
1509	Session 1	ETH-1	-4.221	25.26	5.54207	10.0224	15.0115	20.05	7.39781	2.04609	37.0914	5.98902	-0.606246	-0.093235	-17.9528	0.231273	2021-09-01 18:14:39
550	Session 3	ETH-1	-4.221	25.26	6.2004	11.5313	17.2	23.8693	8.80667	2.02553	37.0328	5.93216	-0.595411	0.658375	-20.1439	0.251141	2022-07-08 15:33:01
1347	Session 2	ETH-1	-4.221	25.26	6.08249	11.329	16.863	20.2531	5.69409	2.01503	36.9818	5.88269	-0.609134	-2.47671	-22.661	0.215115	2021-09-30 19:07:28
1545	Session 1	ETH-1	-4.221	25.26	5.73818	10.4367	15.6011	21.1075	7.01433	2.23936	37.5138	6.39872	-0.62987	0.122701	-19.3213	0.184314	2021-09-11 21:10:47
1672	Session 2	ETH-1	-4.221	25.26	6.15145	11.581	17.2097	21.0419	6.09659	2.0792	37.2391	6.13228	-0.583896	-2.20274	-22.8197	0.244533	2021-09-28 18:43:16
389	Session 3	ETH-1	-4.221	25.26	6.17575	11.3157	16.9213	22.4572	24.7037	2.00716	36.8122	5.71815	-0.634476	-0.295394	-4.2599	0.222413	2022-06-11 05:16:49
1271	Session 2	ETH-1	-4.221	25.26	6.09965	11.4049	16.971	20.4269	1.27318	2.0305	37.0593	5.95793	-0.59435	-2.45667	-27.1185	0.228801	2021-10-07 18:14:39
390	Session 3	ETH-1	-4.221	25.26	6.1931	11.4985	17.1603	22.8012	11.7457	2.01895	36.9992	5.89957	-0.595005	-0.320558	-17.2189	0.263166	2022-06-11 15:25:29
1543	Session 1	ETH-1	-4.221	25.26	5.53076	9.95622	14.8695	20.155	10.6353	2.03648	37.0239	5.92358	-0.670091	0.140617	-14.6582	0.143377	2021-09-09 11:19:25
1448	Session 2	ETH-1	-4.221	25.26	6.08303	11.3377	16.8581	20.1216	6.47152	2.01528	36.9907	5.89134	-0.623043	-2.62249	-21.9226	0.19712	2021-10-06 22:37:35
378	Session 3	ETH-1	-4.221	25.26	6.20439	11.5456	17.2228	22.8116	8.0931	2.02927	37.0474	5.94631	-0.590981	-0.403484	-20.8683	0.267031	2022-06-14 15:38:09
274	Session 3	ETH-1	-4.221	25.26	6.18063	11.5154	17.1012	23.1081	6.9091	2.00504	37.0165	5.9164	-0.656749	-0.054107	-21.9363	0.197807	2022-06-15 13:03:16
1540	Session 1	ETH-1	-4.221	25.26	5.56278	10.1221	15.1145	20.6147	8.59122	2.06446	37.1931	6.08768	-0.623005	0.262792	-17.0017	0.195708	2021-09-09 06:28:05
271	Session 3	ETH-1	-4.221	25.26	6.21215	11.4826	17.1078	22.5865	14.371	2.03985	36.9829	5.88377	-0.650698	-0.498972	-14.6582	0.203543	2022-06-15 23:18:02
1542	Session 1	ETH-1	-4.221	25.26	5.38178	9.60351	14.3819	19.639	8.16236	1.89106	36.6643	5.57477	-0.654362	0.333296	-16.239	0.162897	2021-09-08 23:28:20
278	Session 3	ETH-1	-4.221	25.26	6.19126	11.4676	17.0544	22.9269	9.45062	2.01813	36.9676	5.8689	-0.66715	-0.136564	-19.3875	0.185163	2022-06-16 21:08:41
391	Session 3	ETH-1	-4.221	25.26	6.16437	11.4243	16.9506	22.8996	10.916	1.99104	36.9234	5.82604	-0.69954	-0.077727	-17.8534	0.155292	2022-06-10 18:51:45
472	Session 3	ETH-1	-4.221	25.26	6.20499	11.5581	17.149	22.9406	10.3714	2.02945	37.0601	5.95869	-0.676215	-0.302061	-18.6798	0.175144	2022-06-17 20:31:50
1560	Session 1	ETH-1	-4.221	25.26	5.48761	9.91712	14.8578	20.1435	6.44021	1.99207	36.9841	5.88497	-0.599389	0.206803	-18.6288	0.224923	2021-09-07 20:37:28
469	Session 3	ETH-1	-4.221	25.26	6.1379	11.45	16.9636	23.6792	8.26341	1.96187	36.9496	5.85152	-0.68456	0.633591	-20.4519	0.165712	2022-06-18 05:30:40
477	Session 3	ETH-1	-4.221	25.26	6.18673	11.4898	17.1016	25.3627	11.9546	2.01248	36.9902	5.89091	-0.637688	2.2004	-16.9926	0.215354	2022-06-18 07:06:59
478	Session 3	ETH-1	-4.221	25.26	6.09745	11.2702	16.8395	22.7985	9.22102	1.92533	36.7658	5.67316	-0.590447	0.128284	-19.1369	0.265325	2022-06-18 12:02:09
1578	Session 1	ETH-1	-4.221	25.26	5.52997	10.0163	14.9776	20.2938	9.73978	2.03345	37.0853	5.98307	-0.621268	0.157688	-15.6456	0.202993	2021-09-07 15:44:19
1447	Session 2	ETH-1	-4.221	25.26	6.11129	11.424	17.0295	20.5172	6.42804	2.0422	37.0788	5.97683	-0.567342	-2.40602	-22.1582	0.259648	2021-10-05 03:16:29
459	Session 3	ETH-1	-4.221	25.26	6.20778	11.5491	17.1405	22.8356	5.23948	2.03275	37.0509	5.94978	-0.678645	-0.38702	-23.6501	0.171211	2022-06-18 23:43:13
1344	Session 2	ETH-1	-4.221	25.26	6.15853	11.5391	17.1194	20.7934	3.53512	2.08826	37.1963	6.09081	-0.639277	-2.36309	-25.2357	0.183466	2021-09-29 20:43:29
1576	Session 1	ETH-1	-4.221	25.26	5.42561	9.75437	14.595	19.784	7.67168	1.93213	36.8182	5.72401	-0.636204	0.176689	-17.0522	0.188265	2021-09-07 08:43:50
460	Session 3	ETH-1	-4.221	25.26	6.23683	11.6446	17.2476	23.2027	9.07565	2.06023	37.1485	6.04444	-0.695882	-0.21688	-20.136	0.152501	2022-06-19 04:37:37
481	Session 3	ETH-1	-4.221	25.26	6.19508	11.5295	17.2199	23.0552	6.97101	2.01993	37.0309	5.93038	-0.568688	-0.133699	-21.9179	0.287932	2022-06-19 10:21:28
1570	Session 1	ETH-1	-4.221	25.26	5.44648	9.77117	14.6641	19.8282	5.07855	1.95369	36.8353	5.74059	-0.605877	0.186777	-19.6354	0.22183	2021-09-07 03:48:19
1572	Session 1	ETH-1	-4.221	25.26	5.55684	10.0983	15.0587	20.5902	5.36059	2.05901	37.1689	6.06422	-0.648786	0.285808	-20.099	0.178103	2021-09-06 20:43:15
471	Session 3	ETH-1	-4.221	25.26	6.15076	11.416	16.9081	22.9708	8.41744	1.97683	36.9149	5.81778	-0.719314	0.008333	-20.2509	0.129152	2022-06-18 01:24:39
594	Session 3	ETH-1	-4.221	25.26	6.23259	11.6616	17.3336	23.26	8.79144	2.05507	37.166	6.06139	-0.623671	-0.194624	-20.44	0.228834	2022-06-21 01:15:45
1313	Session 2	ETH-1	-4.221	25.26	6.00222	11.1046	16.5721	21.296	7.79931	1.93779	36.7526	5.66043	-0.594762	-1.01373	-20.1046	0.219565	2021-10-21 23:53:54
1306	Session 2	ETH-1	-4.221	25.26	6.05273	11.2722	16.779	45.7298	14.0484	1.98542	36.9239	5.82651	-0.606045	22.5471	-14.4025	0.206985	2021-10-21 11:50:07
1473	Session 2	ETH-1	-4.221	25.26	6.08112	11.3412	16.9142	20.0279	5.44355	2.01312	36.9942	5.89476	-0.569225	-2.72094	-22.9262	0.254484	2021-10-12 09:40:41
1472	Session 2	ETH-1	-4.221	25.26	6.07688	11.3207	16.8243	20.1939	9.04181	2.00935	36.9733	5.87445	-0.633369	-2.51821	-19.3859	0.18272	2021-10-11 23:25:47
1752	Session 2	ETH-1	-4.221	25.26	6.08012	11.3265	16.8673	19.9652	-5.74877	2.01259	36.9792	5.88022	-0.600052	-2.75335	-33.7741	0.218994	2021-10-14 12:08:33
1791	Session 2	ETH-1	-4.221	25.26	6.17392	11.5328	17.1444	20.7374	7.03575	2.10488	37.1898	6.08445	-0.624257	-2.40525	-21.8392	0.204417	2021-09-24 11:37:59
1710	Session 2	ETH-1	-4.221	25.26	6.10784	11.445	16.9932	23.4647	10.4652	2.03776	37.1002	5.99761	-0.61991	0.433806	-18.272	0.207515	2021-09-26 15:00:57
1793	Session 2	ETH-1	-4.221	25.26	6.12225	11.4606	17.0063	20.3128	8.0559	2.05253	37.1161	6.013	-0.636851	-2.67793	-20.6574	0.191661	2021-09-23 23:38:14
1794	Session 2	ETH-1	-4.221	25.26	6.13728	11.4351	17.0192	20.2	8.35077	2.06946	37.09	5.9877	-0.614885	-2.73784	-20.338	0.215441	2021-09-23 13:18:59
1475	Session 2	ETH-1	-4.221	25.26	6.00714	11.1745	16.6108	19.6285	-8.33764	1.94048	36.8241	5.7297	-0.629712	-2.78268	-35.9307	0.187373	2021-10-11 11:41:27
1751	Session 2	ETH-1	-4.221	25.26	6.07464	11.3186	16.8199	36.2966	11.6478	2.00705	36.9712	5.87239	-0.633342	13.2302	-16.8471	0.180659	2021-10-15 02:31:25
1607	Session 2	ETH-1	-4.221	25.26	6.13652	11.4785	17.044	20.995	9.42664	2.06706	37.1344	6.03076	-0.631873	-2.0465	-19.3747	0.198609	2021-09-18 15:41:33
1697	Session 2	ETH-1	-4.221	25.26	5.98154	11.0897	16.5301	20.2148	7.50284	1.91633	36.7375	5.64574	-0.600407	-2.04198	-20.3431	0.227728	2021-09-27 03:29:23
1603	Session 2	ETH-1	-4.221	25.26	6.14054	11.5075	17.1146	20.6656	9.7779	2.07027	37.164	6.05949	-0.594755	-2.42557	-19.0929	0.238263	2021-09-17 20:50:58
1740	Session 2	ETH-1	-4.221	25.26	6.08967	11.3702	16.8923	29.7998	7.81798	2.02116	37.0239	5.92352	-0.627709	6.77519	-20.6828	0.18583	2021-10-16 05:47:55
1414	Session 1	ETH-1	-4.221	25.26	5.44488	9.80067	14.7027	20.948	4.95256	1.95091	36.8654	5.7698	-0.594938	1.22644	-19.8129	0.221691	2021-09-12 12:43:21
1269	Session 2	ETH-1	-4.221	25.26	6.12044	11.4836	17.0618	22.1998	10.8885	2.04976	37.1397	6.03589	-0.602953	-0.878972	-17.9476	0.218186	2021-10-08 15:51:21
1386	Session 1	ETH-1	-4.221	25.26	5.4761	9.80907	14.7652	19.7073	5.59756	1.98378	36.8739	5.77804	-0.573639	-0.006908	-19.2323	0.231849	2021-09-16 05:56:32
1380	Session 1	ETH-1	-4.221	25.26	5.45995	9.80648	14.7127	19.7866	5.55085	1.96671	36.8713	5.77551	-0.60621	0.076034	-19.2561	0.196544	2021-09-15 16:37:47
1379	Session 1	ETH-1	-4.221	25.26	5.52092	9.98034	14.9784	20.0549	6.20358	2.02515	37.0486	5.94748	-0.576281	-0.005232	-19.0148	0.232718	2021-09-15 04:49:02
1381	Session 1	ETH-1	-4.221	25.26	5.68624	10.3788	15.5865	21.4991	4.41588	2.18627	37.4548	6.34156	-0.534745	0.620893	-21.6879	0.281665	2021-09-14 16:12:02
1631	Session 2	ETH-1	-4.221	25.26	6.08862	11.3327	16.862	32.7688	14.0278	2.02141	36.9856	5.88638	-0.62	9.75268	-14.5758	0.193628	2021-10-19 04:53:43
1268	Session 2	ETH-1	-4.221	25.26	6.09904	11.4287	16.9596	21.0772	5.20628	2.02899	37.0837	5.98151	-0.628123	-1.86786	-23.3415	0.190675	2021-10-08 05:46:57
1418	Session 1	ETH-1	-4.221	25.26	5.51177	9.94332	14.8892	19.7879	6.27787	2.01678	37.0108	5.91086	-0.618687	-0.193732	-18.8622	0.190243	2021-09-14 01:21:06
1622	Session 2	ETH-1	-4.221	25.26	6.05949	11.2714	16.8092	22.2248	6.71649	1.99265	36.923	5.82571	-0.582524	-0.435202	-21.5342	0.235701	2021-10-20 02:39:47
1308	Session 2	ETH-1	-4.221	25.26	5.97438	11.1164	16.5105	19.9487	2.22561	1.90773	36.7648	5.67218	-0.63823	-2.35493	-25.5175	0.171021	2021-10-20 14:09:54
1412	Session 1	ETH-1	-4.221	25.26	5.37808	9.65318	14.4509	19.176	4.55071	1.88531	36.715	5.62394	-0.630932	-0.219282	-19.8542	0.179182	2021-09-13 11:24:26
1671	Session 2	ETH-1	-4.221	25.26	6.14193	11.5114	17.0829	20.6797	7.53972	2.07162	37.1681	6.06339	-0.631164	-2.41958	-21.276	0.193919	2021-09-28 07:59:41
1411	Session 1	ETH-1	-4.221	25.26	5.39184	9.60212	14.4371	19.2612	5.65406	1.9018	36.6629	5.57336	-0.609003	-0.034524	-18.6944	0.204391	2021-09-13 00:52:55
1305	Session 2	ETH-1	-4.221	25.26	6.01405	11.1941	16.6823	26.0089	9.84812	1.94711	36.8441	5.74917	-0.585549	3.41837	-18.2957	0.231312	2021-10-21 01:13:36
1604	Session 2	ETH-1	-4.221	25.26	6.06369	11.4218	16.9274	20.6679	13.6128	1.99162	37.0766	5.97469	-0.616681	-2.25431	-15.1235	0.215381	2021-09-17 15:51:21
599	Session 3	ETH-1	-4.221	25.26	6.27495	11.7278	17.4406	27.07	11.4923	2.09782	37.2336	6.12693	-0.626243	3.39686	-17.9876	0.225864	2022-06-21 05:17:49
1709	Session 2	ETH-1	-4.221	25.26	6.11096	11.4214	16.9531	20.3488	9.90424	2.04195	37.0761	5.97422	-0.639586	-2.56549	-18.7753	0.186997	2021-09-26 04:29:13
586	Session 3	ETH-1	-4.221	25.26	6.2061	11.5472	17.1987	23.0669	9.76634	2.03103	37.049	5.94793	-0.617932	-0.157213	-19.248	0.234235	2022-06-21 18:29:03
603	Session 3	ETH-1	-4.221	25.26	6.13236	11.5184	17.0951	23.3039	8.21351	1.95346	37.0196	5.91942	-0.616111	0.131474	-20.6247	0.235657	2022-06-22 05:09:57
1497	Session 1	ETH-1	-4.221	25.26	5.50065	9.88251	14.7949	19.8628	15.6585	2.00719	36.9488	5.85069	-0.64101	0.000115	-9.58705	0.192571	2021-09-02 06:10:55
1515	Session 1	ETH-1	-4.221	25.26	5.5532	10.0633	15.0468	20.3378	7.84693	2.05642	37.1331	6.02951	-0.622716	0.107792	-17.6048	0.213013	2021-09-01 23:05:36
604	Session 3	ETH-1	-4.221	25.26	6.27194	11.7382	17.4227	24.475	14.4696	2.09423	37.2442	6.13725	-0.650819	0.841118	-15.1138	0.199263	2022-06-21 11:44:24
1508	Session 1	ETH-1	-4.221	25.26	5.4834	9.87645	14.7893	19.9327	8.91515	1.98907	36.9426	5.84472	-0.622935	0.080695	-16.1332	0.209906	2021-09-02 11:05:11
1342	Session 2	ETH-1	-4.221	25.26	6.10663	11.4423	17.0047	30.0846	12.9336	2.03656	37.0975	5.99496	-0.604752	6.91004	-15.8675	0.220416	2021-09-30 08:44:18
1500	Session 1	ETH-1	-4.221	25.26	5.69733	10.4183	15.5785	20.9765	15.1	2.19661	37.4951	6.3806	-0.59231	0.030796	-11.3689	0.239495	2021-09-03 22:44:40
167	Session 3	ETH-1	-4.221	25.26	6.20217	11.553	17.1814	22.9506	3.93882	2.02663	37.0549	5.95364	-0.636502	-0.282281	-24.9149	0.213425	2022-06-22 15:01:11
598	Session 3	ETH-1	-4.221	25.26	6.2341	11.6279	17.2751	23.6278	11.9697	2.05793	37.1315	6.0279	-0.649937	0.231478	-17.291	0.199579	2022-06-21 23:26:30
605	Session 3	ETH-1	-4.221	25.26	6.17986	11.536	17.1377	26.4499	14.4612	2.00346	37.0376	5.9368	-0.640035	3.17132	-14.6391	0.211018	2022-06-21 06:54:04
153	Session 3	ETH-2	-4.221	25.26	-5.85201	-5.309	-11.8125	-10.5088	-27.1888	-10.2063	19.83	-10.7547	-0.594067	0.081872	-10.7913	0.257796	2022-06-23 11:28:39
624	Session 4	ETH-2	-4.221	25.26	-5.83156	-5.27219	-11.7781	-10.3929	-32.8864	-10.1591	19.9557	-10.6328	-0.616845	0.124921	-16.6781	0.248411	2022-07-15 16:42:23
1621	Session 2	ETH-2	-4.221	25.26	-6.0023	-5.61328	-12.2932	-9.76393	-22.3457	-10.2259	19.6978	-10.8829	-0.623782	1.44726	-5.10843	0.193208	2021-10-19 09:21:13
839	Session 5	ETH-2	-4.221	25.26	-5.99075	-5.6402	-12.3044	-11.3053	-69.7438	-10.2715	19.6861	-10.8943	-0.620501	-0.057378	-53.3036	0.250538	2023-11-04 15:28:49
499	Session 3	ETH-2	-4.221	25.26	-5.84096	-5.33552	-11.8516	-10.2606	-22.4992	-10.1936	19.8028	-10.7811	-0.618804	0.386069	-5.98236	0.215169	2022-07-13 08:08:18
1404	Session 1	ETH-2	-4.221	25.26	-6.54599	-6.92055	-14.1236	-13.3188	-13.5585	-10.1785	19.8284	-10.7563	-0.620895	0.481019	7.01896	0.199113	2021-09-14 04:35:43
833	Session 5	ETH-2	-4.221	25.26	-6.02609	-5.82626	-12.5161	-11.6301	-27.5844	-10.3022	19.4967	-11.078	-0.614265	-0.011683	-9.99766	0.257256	2023-11-05 05:52:20
1183	Session 5	ETH-2	-4.221	25.26	-5.85632	-5.33808	-11.9103	-10.4583	-28.0272	-10.1396	19.9934	-10.5962	-0.659779	0.191372	-11.5826	0.209272	2023-10-19 18:04:07
1664	Session 2	ETH-2	-4.221	25.26	-5.8627	-5.21795	-11.771	-8.21028	-17.0966	-10.0919	20.1015	-10.4914	-0.630885	2.22147	-0.697316	0.189963	2021-09-27 22:37:17
304	Session 4	ETH-2	-4.221	25.26	-5.65994	-5.06873	-11.4568	-9.99806	-25.0693	-9.98362	20.1636	-10.4311	-0.670853	0.114823	-9.3105	0.166625	2022-08-03 05:59:40
843	Session 5	ETH-2	-4.221	25.26	-5.99835	-5.65975	-12.426	-11.3118	-14.9086	-10.2788	19.6662	-10.9136	-0.716332	-0.024709	2.54758	0.147994	2023-11-04 00:38:06
1628	Session 2	ETH-2	-4.221	25.26	-5.97232	-5.5232	-12.1523	-9.1473	-21.5458	-10.1973	19.7898	-10.7937	-0.601382	1.88935	-4.50366	0.21903	2021-10-18 21:39:15
1265	Session 2	ETH-2	-4.221	25.26	-5.93141	-5.42575	-12.0045	-8.75666	-11.3876	-10.1574	19.8893	-10.6972	-0.590539	2.08794	5.59374	0.23228	2021-10-08 08:56:41
709	Session 5	ETH-2	-4.221	25.26	-5.99013	-5.64403	-12.4284	-11.1693	-17.9153	-10.2707	19.6822	-10.8981	-0.742859	0.087841	-0.552202	0.119631	2023-11-02 15:26:06
635	Session 4	ETH-2	-4.221	25.26	-5.85126	-5.32947	-11.8715	-10.4552	-24.1293	-10.178	19.8971	-10.6896	-0.634229	0.177173	-7.64092	0.229185	2022-07-16 04:32:10
1377	Session 1	ETH-2	-4.221	25.26	-6.30522	-6.38017	-13.3581	-12.3162	-10.5221	-9.94257	20.3793	-10.2219	-0.629539	0.408558	8.77898	0.188973	2021-09-15 08:32:50
1184	Session 5	ETH-2	-4.221	25.26	-5.84448	-5.33676	-11.8782	-10.2783	-140.824	-10.1271	19.9948	-10.5949	-0.640869	0.370645	-126.301	0.229375	2023-10-19 23:45:33
1754	Session 2	ETH-2	-4.221	25.26	-5.93305	-5.41469	-11.9903	-8.09022	-8.88603	-10.1595	19.9006	-10.6862	-0.58541	2.73936	8.11798	0.237319	2021-10-16 09:53:52
151	Session 3	ETH-2	-4.221	25.26	-5.78471	-5.15675	-11.6665	-9.93933	-21.5877	-10.1402	19.9856	-10.6038	-0.666536	0.351132	-5.46677	0.179508	2022-06-23 08:01:42
870	Session 5	ETH-2	-4.221	25.26	-5.95116	-5.60522	-12.2404	-11.0577	-50.1122	-10.2306	19.7216	-10.8599	-0.631381	0.122627	-33.4329	0.238075	2023-11-29 22:06:25
1180	Session 5	ETH-2	-4.221	25.26	-5.81238	-5.24052	-11.7818	-10.0549	-41.5374	-10.0965	20.0927	-10.4999	-0.671769	0.402817	-25.555	0.196484	2023-10-20 01:42:05
232	Session 4	ETH-2	-4.221	25.26	-5.79775	-5.19051	-11.6189	-10.1669	-29.2984	-10.1261	20.0393	-10.5517	-0.571593	0.189065	-13.2249	0.285677	2022-07-26 11:06:34
1619	Session 2	ETH-2	-4.221	25.26	-5.9578	-5.43579	-12.0697	-8.85118	-18.5447	-10.1851	19.8791	-10.7071	-0.619195	2.01262	-1.63828	0.198271	2021-10-19 18:04:23
123	Session 3	ETH-2	-4.221	25.26	-5.82183	-5.31413	-11.8207	-10.6256	-25.0958	-10.174	19.8247	-10.7599	-0.628587	-0.025943	-8.68509	0.216964	2022-07-01 18:36:48
235	Session 4	ETH-2	-4.221	25.26	-5.7806	-5.21271	-11.7455	-9.26026	-30.2244	-10.107	20.0165	-10.5738	-0.695483	1.14989	-14.1411	0.149006	2022-07-26 21:15:41
1507	Session 1	ETH-2	-4.221	25.26	-6.56244	-6.99858	-14.2213	-13.9104	-15.159	-10.1931	19.7488	-10.8335	-0.625686	0.03824	5.55814	0.193582	2021-09-02 07:49:25
768	Session 5	ETH-2	-4.221	25.26	-5.94328	-5.60889	-12.3019	-11.2334	-49.3857	-10.2221	19.7178	-10.8635	-0.698157	-0.047674	-32.6949	0.167054	2023-11-08 22:51:32
350	Session 4	ETH-2	-4.221	25.26	-5.85089	-5.34712	-11.8551	-10.3348	-27.2441	-10.177	19.879	-10.7071	-0.600652	0.334366	-10.7743	0.252302	2022-07-28 14:39:58
1295	Session 2	ETH-2	-4.221	25.26	-5.98548	-5.48796	-12.1147	-6.9139	-16.1669	-10.2126	19.8258	-10.7587	-0.584484	4.07646	0.913386	0.237905	2021-10-21 15:05:33
1668	Session 2	ETH-2	-4.221	25.26	-5.91855	-5.40449	-11.9734	-9.19634	-13.3001	-10.1445	19.911	-10.6762	-0.593383	1.60063	3.59236	0.230212	2021-09-28 11:23:42
875	Session 5	ETH-2	-4.221	25.26	-5.97264	-5.67703	-12.3412	-10.9862	-25.7922	-10.2508	19.6485	-10.9307	-0.640119	0.33943	-8.52231	0.22877	2023-11-28 13:34:10
1300	Session 2	ETH-2	-4.221	25.26	-6.07103	-5.71913	-12.4371	-9.92033	-19.6141	-10.2952	19.5898	-10.9877	-0.593519	1.50229	-2.04648	0.227573	2021-10-21 06:04:55
1512	Session 1	ETH-2	-4.221	25.26	-6.58502	-7.02884	-14.2833	-14.2885	-20.5146	-10.216	19.7179	-10.8634	-0.635168	-0.284225	0.173956	0.183655	2021-09-04 00:20:28
157	Session 3	ETH-2	-4.221	25.26	-5.84407	-5.42839	-11.935	-10.859	-24.4669	-10.1935	19.7078	-10.8732	-0.608205	-0.03208	-7.79801	0.241836	2022-06-24 11:12:49
1219	Session 5	ETH-2	-4.221	25.26	-5.76683	-5.15184	-11.6877	-10.0362	-93.0449	-10.0513	20.1829	-10.4124	-0.711363	0.243436	-78.128	0.154463	2023-10-19 00:32:42
231	Session 4	ETH-2	-4.221	25.26	-5.84132	-5.36017	-12.0117	-10.5171	-23.498	-10.1663	19.8656	-10.7201	-0.756046	0.176345	-6.94928	0.081459	2022-07-28 01:00:24
505	Session 3	ETH-2	-4.221	25.26	-5.86533	-5.34184	-11.8318	-10.2787	-25.1965	-10.2193	19.7964	-10.7873	-0.567314	0.380472	-8.68701	0.27518	2022-07-12 10:23:59
963	Session 5	ETH-2	-4.221	25.26	-5.87528	-5.51382	-12.0605	-11.3242	-310.553	-10.1533	19.8145	-10.7697	-0.618373	-0.330649	-298.631	0.253531	2023-10-14 22:06:32
1494	Session 1	ETH-2	-4.221	25.26	-6.51617	-6.82175	-14.0078	-13.5767	-21.9866	-10.1505	19.9291	-10.6585	-0.632256	0.020495	-1.81204	0.186903	2021-09-02 00:44:34
1296	Session 2	ETH-2	-4.221	25.26	-5.98267	-5.5094	-12.1483	-8.88745	-17.3261	-10.2088	19.8039	-10.78	-0.600153	2.12429	-0.226598	0.219962	2021-10-20 17:23:23
1408	Session 1	ETH-2	-4.221	25.26	-6.4164	-6.59879	-13.6552	-13.0514	-16.1081	-10.0527	20.1565	-10.438	-0.598993	0.103894	3.63754	0.223131	2021-09-13 16:53:12
1630	Session 2	ETH-2	-4.221	25.26	-5.93138	-5.40349	-12.0044	-8.34917	-17.269	-10.1582	19.912	-10.6751	-0.612424	2.45501	-0.432742	0.205865	2021-10-20 05:49:18
757	Session 5	ETH-2	-4.221	25.26	-5.96398	-5.63263	-12.3234	-11.1158	-39.2264	-10.2433	19.6937	-10.8869	-0.674948	0.118975	-22.2895	0.192109	2023-11-06 18:10:25
502	Session 3	ETH-2	-4.221	25.26	-5.81287	-5.21303	-11.6976	-9.82229	-27.6385	-10.1682	19.9281	-10.6596	-0.613269	0.582598	-11.4775	0.222511	2022-07-12 20:30:01
173	Session 3	ETH-2	-4.221	25.26	-5.80025	-5.21344	-11.6548	-10.0647	-21.6756	-10.1547	19.9276	-10.66	-0.582683	0.338413	-5.42818	0.269881	2022-06-23 14:47:16
1224	Session 5	ETH-2	-4.221	25.26	-5.75771	-5.158	-11.635	-9.92199	-75.4592	-10.0414	20.1766	-10.4185	-0.661514	0.371175	-60.2508	0.207465	2023-10-19 06:26:27
631	Session 4	ETH-2	-4.221	25.26	-5.86413	-5.37631	-11.9148	-8.72626	-21.0291	-10.19	19.8492	-10.7361	-0.618426	2.01904	-4.38251	0.244994	2022-07-16 14:46:34
854	Session 5	ETH-2	-4.221	25.26	-5.98451	-5.60072	-12.2923	-11.0478	-33.2103	-10.2663	19.7263	-10.8553	-0.65377	0.123569	-16.2078	0.214827	2023-11-05 20:52:02
1228	Session 5	ETH-2	-4.221	25.26	-5.75829	-5.13713	-11.6184	-9.76078	104.939	-10.0428	20.1979	-10.3979	-0.664712	0.492087	123.069	0.204055	2023-10-19 09:43:27
871	Session 5	ETH-2	-4.221	25.26	-5.96495	-5.58578	-12.2392	-11.1268	-43.8203	-10.246	19.7414	-10.8406	-0.635059	0.01363	-27.0535	0.234138	2023-11-29 03:42:30
589	Session 3	ETH-2	-4.221	25.26	-5.77303	-5.15478	-11.6089	-9.77532	-25.6373	-10.1278	19.9876	-10.6018	-0.622347	0.512886	-9.59936	0.229195	2022-06-22 06:48:57
553	Session 3	ETH-2	-4.221	25.26	-5.85809	-5.34878	-11.9048	-10.4838	-22.2514	-10.2113	19.7893	-10.7942	-0.641838	0.187046	-5.68605	0.192494	2022-07-09 06:23:20
1467	Session 2	ETH-2	-4.221	25.26	-5.97998	-5.4976	-12.1532	-9.10648	-25.7183	-10.2064	19.816	-10.7683	-0.619565	1.87905	-8.79088	0.199487	2021-10-11 14:59:09
1692	Session 2	ETH-2	-4.221	25.26	-5.93888	-5.4334	-12.0437	-8.82867	-11.0646	-10.165	19.8815	-10.7048	-0.614935	2.03056	5.94548	0.207341	2021-09-26 18:29:35
1777	Session 2	ETH-2	-4.221	25.26	-5.93457	-5.45023	-12.0471	-9.44905	-17.6784	-10.1598	19.8643	-10.7215	-0.606182	1.43728	-0.753399	0.217366	2021-09-23 16:37:16
1337	Session 2	ETH-2	-4.221	25.26	-5.95052	-5.47169	-12.116	-8.10488	-9.1458	-10.176	19.8424	-10.7427	-0.638153	2.83949	7.98613	0.180929	2021-09-30 11:59:21
1792	Session 2	ETH-2	-4.221	25.26	-5.95501	-5.55294	-12.2088	-9.66878	-17.1015	-10.1778	19.7594	-10.8232	-0.647108	1.42196	0.058275	0.173801	2021-09-24 02:55:37
17	Session 4	ETH-2	-4.221	25.26	-5.87884	-5.43272	-12.0565	-10.5477	-27.4318	-10.2036	19.7914	-10.7921	-0.69079	0.291295	-10.7682	0.159036	2022-07-24 01:23:57
663	Session 5	ETH-2	-4.221	25.26	-5.79686	-5.2438	-11.7241	-10.0729	-126.126	-10.0799	20.0893	-10.5032	-0.626272	0.391205	-111.563	0.244639	2023-10-25 16:29:29
1182	Session 5	ETH-2	-4.221	25.26	-5.75302	-5.15786	-11.6087	-9.78982	124.115	-10.0364	20.1768	-10.4183	-0.639857	0.504427	142.6	0.230338	2023-10-21 08:13:36
1743	Session 2	ETH-2	-4.221	25.26	-5.96529	-5.52778	-12.1949	-5.85231	-6.4002	-10.1897	19.7851	-10.7983	-0.647221	5.23031	10.9073	0.167577	2021-10-14 16:12:26
994	Session 5	ETH-2	-4.221	25.26	-5.79759	-5.247	-11.8124	-10.0684	-43.6358	-10.0805	20.0861	-10.5063	-0.711623	0.402219	-27.6914	0.15364	2023-10-25 05:18:13
1186	Session 5	ETH-2	-4.221	25.26	-5.76529	-5.1895	-11.6798	-9.62696	-9.36713	-10.0483	20.1446	-10.4496	-0.66779	0.732642	6.99934	0.200577	2023-10-21 11:30:30
1335	Session 2	ETH-2	-4.221	25.26	-5.98963	-5.56409	-12.2333	-8.35023	-8.60245	-10.2142	19.7481	-10.8342	-0.624983	2.77775	8.76534	0.195098	2021-09-30 22:30:01
50	Session 4	ETH-2	-4.221	25.26	-5.87361	-5.40246	-12.0032	-4.3876	-22.9108	-10.1991	19.8224	-10.7621	-0.672152	6.45767	-6.2347	0.182247	2022-07-21 21:50:41
995	Session 5	ETH-2	-4.221	25.26	-5.81938	-5.25891	-11.8107	-10.2838	-4.66823	-10.1033	20.074	-10.518	-0.675497	0.208459	11.9733	0.192229	2023-10-24 17:08:39
162	Session 3	ETH-2	-4.221	25.26	-5.82793	-5.26548	-11.8198	-10.0594	-26.7131	-10.1823	19.8745	-10.7116	-0.669402	0.448472	-10.4182	0.177502	2022-06-22 21:27:54
1695	Session 2	ETH-2	-4.221	25.26	-5.91616	-5.35246	-11.9135	-9.35646	-19.9444	-10.1438	19.9641	-10.6246	-0.586679	1.334	-3.27076	0.237745	2021-09-26 07:51:50
996	Session 5	ETH-2	-4.221	25.26	-5.85302	-5.38847	-11.9724	-10.8362	-113.21	-10.1343	19.9421	-10.6459	-0.676262	-0.089265	-98.12	0.191536	2023-10-23 16:57:16
1477	Session 2	ETH-2	-4.221	25.26	-5.95268	-5.44784	-12.0776	-9.58655	-22.6026	-10.1792	19.8668	-10.719	-0.620581	1.29345	-5.74787	0.197866	2021-10-13 13:50:34
46	Session 4	ETH-2	-4.221	25.26	-5.87036	-5.3279	-11.9134	-10.2277	-25.0727	-10.1984	19.8987	-10.688	-0.658384	0.403958	-8.58302	0.196224	2022-07-22 08:05:39
1704	Session 2	ETH-2	-4.221	25.26	-5.95671	-5.42448	-12.0692	-9.14188	-20.1327	-10.1843	19.8906	-10.6959	-0.631049	1.69596	-3.27705	0.190483	2021-09-25 19:45:20
19	Session 4	ETH-2	-4.221	25.26	-5.88142	-5.42645	-12.0035	-10.3947	-28.86	-10.2066	19.7979	-10.7859	-0.640729	0.43338	-12.2304	0.214114	2022-07-23 14:00:05
1466	Session 2	ETH-2	-4.221	25.26	-5.97203	-5.46836	-12.0945	-8.56426	-15.0296	-10.199	19.8458	-10.7393	-0.597317	2.36835	2.01711	0.22425	2021-10-12 12:51:38
1001	Session 5	ETH-2	-4.221	25.26	-5.85895	-5.39104	-11.9333	-10.5632	-227.724	-10.1405	19.9395	-10.6485	-0.627967	0.191852	-214.574	0.242947	2023-10-24 05:16:53
731	Session 5	ETH-2	-4.221	25.26	-5.99706	-5.6954	-12.4266	-11.281	-33.6785	-10.2761	19.6299	-10.9488	-0.683089	0.078142	-16.487	0.182272	2023-12-01 13:32:12
159	Session 3	ETH-2	-4.221	25.26	-5.81447	-5.20152	-11.7342	-10.0613	-24.3376	-10.1703	19.9399	-10.6481	-0.660001	0.317906	-8.14257	0.188147	2022-06-22 16:41:30
662	Session 5	ETH-2	-4.221	25.26	-5.77593	-5.16925	-11.6843	-10.2402	-83.0699	-10.0604	20.1652	-10.4295	-0.681311	0.072229	-67.9477	0.185813	2023-10-26 17:08:09
700	Session 5	ETH-2	-4.221	25.26	-6.01324	-5.7962	-12.5179	-11.6243	-45.3771	-10.2896	19.5272	-11.0484	-0.659116	-0.066361	-28.1833	0.209338	2023-11-02 00:46:46
426	Session 4	ETH-2	-4.221	25.26	-5.98287	-5.73245	-12.2854	-11.0113	-26.507	-10.3035	19.4848	-11.0896	-0.518304	0.425502	-9.1304	0.348102	2022-07-20 10:32:16
1781	Session 2	ETH-2	-4.221	25.26	-5.94183	-5.4427	-12.0173	-9.29317	-18.0081	-10.1678	19.872	-10.714	-0.575968	1.5797	-1.09593	0.249399	2021-09-22 14:19:23
962	Session 5	ETH-2	-4.221	25.26	-5.86699	-5.46192	-11.9518	-11.1576	104.638	-10.1464	19.8673	-10.7185	-0.568367	-0.266548	123.615	0.306636	2023-10-14 06:40:09
1707	Session 2	ETH-2	-4.221	25.26	-5.90964	-5.32412	-11.9024	-8.868	-14.4157	-10.1379	19.9931	-10.5965	-0.61021	1.77064	2.28891	0.21228	2021-09-27 06:57:52
1599	Session 2	ETH-2	-4.221	25.26	-5.92577	-5.35235	-11.9493	-9.16243	-20.8236	-10.1541	19.9643	-10.6245	-0.61311	1.5299	-4.15487	0.210584	2021-09-17 22:29:10
239	Session 4	ETH-2	-4.221	25.26	-5.87165	-5.3999	-12.0562	-10.6743	-27.6013	-10.1972	19.825	-10.7595	-0.730403	0.097341	-11.0124	0.112894	2022-07-25 23:08:14
619	Session 4	ETH-2	-4.221	25.26	-5.78605	-5.2169	-11.6822	-9.7306	-23.2612	-10.1126	20.0122	-10.5779	-0.621611	0.683031	-7.04841	0.240957	2022-07-17 02:50:38
1260	Session 2	ETH-2	-4.221	25.26	-5.94803	-5.43813	-12.0055	-8.83458	-18.0079	-10.1746	19.8767	-10.7094	-0.56213	2.03412	-1.09811	0.263938	2021-10-08 19:08:32
1596	Session 2	ETH-2	-4.221	25.26	-5.99803	-5.56518	-12.2048	-9.55924	-23.7951	-10.2231	19.747	-10.8353	-0.586342	1.55739	-6.68239	0.238538	2021-09-18 05:24:00
913	Session 5	ETH-2	-4.221	25.26	-5.8156	-5.27311	-11.8208	-10.0472	-21.2886	-10.0987	20.0595	-10.5321	-0.675645	0.476175	-4.90105	0.191614	2023-10-29 04:58:14
428	Session 4	ETH-2	-4.221	25.26	-5.8483	-5.33903	-12.0043	-10.4743	-29.8364	-10.1745	19.8873	-10.6991	-0.762245	0.177049	-13.429	0.092086	2022-07-19 01:10:24
28	Session 4	ETH-2	-4.221	25.26	-5.8601	-5.3636	-11.9184	-10.5814	-34.4542	-10.1862	19.8622	-10.7235	-0.638804	0.118263	-18.0648	0.213487	2022-07-24 22:27:09
728	Session 5	ETH-2	-4.221	25.26	-5.98893	-5.61339	-12.3094	-10.8328	-38.5474	-10.2705	19.7134	-10.8678	-0.653959	0.366492	-21.6097	0.213716	2023-11-30 19:39:36
1591	Session 2	ETH-2	-4.221	25.26	-5.91792	-5.33086	-11.9416	-8.31104	-20.5487	-10.1465	19.9862	-10.6032	-0.634616	2.34716	-3.92592	0.187862	2021-09-18 10:26:54
1193	Session 5	ETH-2	-4.221	25.26	-5.81629	-5.22703	-11.7702	-10.4736	86.9099	-10.1011	20.1065	-10.4865	-0.669288	-0.047437	105.009	0.199068	2023-10-20 16:56:03
915	Session 5	ETH-2	-4.221	25.26	-5.84562	-5.33877	-11.9034	-10.297	-17.6543	-10.1282	19.9927	-10.5969	-0.663208	0.355798	-1.0442	0.20498	2023-10-28 17:53:43
158	Session 3	ETH-2	-4.221	25.26	-5.79799	-5.18719	-11.7139	-10.0085	-22.528	-10.1532	19.9545	-10.6339	-0.670693	0.342467	-6.3486	0.175514	2022-06-23 03:12:59
1179	Session 5	ETH-2	-4.221	25.26	-5.81066	-5.2444	-11.7757	-9.9306	-64.5987	-10.0945	20.0887	-10.5037	-0.663482	0.536262	-48.9954	0.20524	2023-10-20 18:53:58
919	Session 5	ETH-2	-4.221	25.26	-5.81938	-5.29217	-11.8614	-9.47154	-51.2353	-10.102	20.0401	-10.5509	-0.693992	1.09632	-35.309	0.172118	2023-10-28 05:44:52
1606	Session 2	ETH-2	-4.221	25.26	-5.92002	-5.38221	-12.0197	-8.81625	-16.7385	-10.1468	19.9337	-10.6541	-0.660751	1.93997	0.052595	0.160244	2021-09-18 17:18:22
1590	Session 2	ETH-2	-4.221	25.26	-5.94243	-5.45869	-12.0955	-9.62603	-27.2535	-10.1679	19.8556	-10.7298	-0.638614	1.2754	-10.4686	0.183451	2021-09-20 16:25:40
15	Session 4	ETH-2	-4.221	25.26	-5.85534	-5.45915	-11.923	-10.6015	-28.4638	-10.1776	19.7643	-10.8184	-0.553985	0.290103	-11.7912	0.306665	2022-07-24 11:09:30
916	Session 5	ETH-2	-4.221	25.26	-5.82606	-5.28552	-11.8159	-10.4657	-52.988	-10.1094	20.0469	-10.5443	-0.647589	0.078213	-37.0969	0.221748	2023-10-27 17:28:13
1747	Session 2	ETH-2	-4.221	25.26	-5.95388	-5.49642	-12.0777	-7.73992	1.34262	-10.1787	19.8171	-10.7672	-0.571456	3.25838	18.7094	0.253332	2021-10-15 06:40:45
660	Session 5	ETH-2	-4.221	25.26	-5.73918	-5.10701	-11.5852	-9.64435	12.1295	-10.0236	20.2285	-10.3681	-0.680696	0.549122	28.6547	0.186394	2023-10-27 05:23:27
1176	Session 5	ETH-2	-4.221	25.26	-5.80872	-5.24907	-11.7763	-9.79469	-198.054	-10.0923	20.084	-10.5083	-0.661488	0.683005	-184.671	0.207328	2023-10-21 02:33:32
1258	Session 2	ETH-2	-4.221	25.26	-5.92688	-5.35931	-11.9428	-6.01013	-17.3085	-10.155	19.9572	-10.6314	-0.598504	4.73027	-0.564965	0.223172	2021-10-09 06:57:36
1495	Session 1	ETH-2	-4.221	25.26	-6.50913	-6.77725	-13.8938	-13.4435	-21.5734	-10.1446	19.9745	-10.6145	-0.567986	0.065912	-1.48578	0.253095	2021-09-01 19:51:31
798	Session 5	ETH-2	-4.221	25.26	-5.99455	-5.63482	-12.2992	-9.13491	-57.2445	-10.2757	19.6916	-10.889	-0.616685	2.12682	-40.5897	0.254464	2023-11-09 19:40:37
756	Session 5	ETH-2	-4.221	25.26	-6.0249	-5.7539	-12.499	-11.5022	-46.7869	-10.3036	19.5704	-11.0066	-0.66962	-0.027865	-29.6875	0.197826	2023-11-07 14:04:29
797	Session 5	ETH-2	-4.221	25.26	-5.94998	-5.53495	-12.2257	-10.865	-55.4543	-10.232	19.7932	-10.7904	-0.687198	0.176146	-39.0034	0.178659	2023-11-11 04:34:11
1505	Session 1	ETH-2	-4.221	25.26	-6.63515	-7.02721	-14.3095	-14.2071	-18.8339	-10.2694	19.7197	-10.8617	-0.611247	-0.205031	1.94081	0.208656	2021-09-03 18:17:48
463	Session 3	ETH-2	-4.221	25.26	-5.9425	-5.63269	-12.2719	-10.9272	-21.143	-10.2909	19.499	-11.0758	-0.645118	0.309843	-3.91019	0.210633	2022-06-17 22:07:17
1135	Session 5	ETH-2	-4.221	25.26	-5.99182	-5.65776	-12.3562	-11.2272	-38.6807	-10.272	19.6682	-10.9117	-0.654505	0.056842	-21.6564	0.213676	2023-11-15 00:40:13
1558	Session 1	ETH-2	-4.221	25.26	-6.54876	-6.85596	-14.0345	-13.2369	-0.039349	-10.1839	19.8943	-10.6923	-0.591623	0.433934	20.6928	0.230257	2021-09-08 12:19:36
308	Session 4	ETH-2	-4.221	25.26	-5.85533	-5.37621	-11.945	-9.94071	-33.4175	-10.1806	19.8492	-10.736	-0.65819	0.791229	-16.991	0.184833	2022-07-31 21:35:18
1563	Session 1	ETH-2	-4.221	25.26	-6.62767	-7.06881	-14.3314	-14.0017	-14.4572	-10.2599	19.6773	-10.9029	-0.600106	0.087093	6.48493	0.220705	2021-09-07 05:24:55
258	Session 3	ETH-2	-4.221	25.26	-5.80145	-5.24273	-11.8285	-10.0763	-17.5702	-10.1549	19.8977	-10.6891	-0.728095	0.385661	-1.19557	0.123269	2022-06-17 00:22:37
189	Session 3	ETH-2	-4.221	25.26	-5.75022	-5.07789	-11.5173	-9.64556	-28.1443	-10.1063	20.0662	-10.5256	-0.629361	0.489333	-12.3217	0.210768	2022-07-05 17:36:34
1055	Session 5	ETH-2	-4.221	25.26	-5.97273	-5.67257	-12.3676	-10.9851	-24.8242	-10.2511	19.6531	-10.9263	-0.671207	0.33152	-7.5458	0.195506	2023-11-19 03:31:05
1091	Session 5	ETH-2	-4.221	25.26	-5.9117	-5.52368	-12.1905	-10.9539	-30.2174	-10.1917	19.8046	-10.7794	-0.702367	0.063641	-13.3895	0.161614	2023-11-25 11:09:40
341	Session 4	ETH-2	-4.221	25.26	-5.88994	-5.42752	-11.91	-10.5707	-20.5342	-10.2156	19.7968	-10.7869	-0.536206	0.257629	-3.75078	0.322432	2022-07-29 11:44:25
1142	Session 5	ETH-2	-4.221	25.26	-5.98504	-5.61905	-12.287	-11.1727	-59.5679	-10.2662	19.7076	-10.8734	-0.629777	0.034131	-42.9937	0.240264	2023-11-14 10:22:06
1226	Session 5	ETH-2	-4.221	25.26	-5.81449	-5.274	-11.8618	-9.95357	-101.765	-10.0975	20.0586	-10.533	-0.717335	0.572589	-86.7242	0.148257	2023-10-17 21:59:09
1446	Session 2	ETH-2	-4.221	25.26	-5.73028	-5.15312	-11.522	-3.5303	-6.33545	-9.95333	20.1674	-10.4274	-0.580502	6.81943	9.97063	0.24363	2021-10-05 17:15:18
311	Session 4	ETH-2	-4.221	25.26	-5.77554	-5.13235	-11.6502	-10.2671	-28.0662	-10.1045	20.0988	-10.494	-0.683689	-0.029133	-12.1093	0.154828	2022-08-01 20:54:45
1535	Session 1	ETH-2	-4.221	25.26	-6.59575	-7.09399	-14.3983	-13.7264	-18.7802	-10.225	19.6515	-10.9279	-0.676112	0.417084	2.0857	0.139431	2021-09-08 20:13:16
1095	Session 5	ETH-2	-4.221	25.26	-5.94538	-5.65618	-12.3649	-11.3781	-46.3147	-10.2226	19.6697	-10.9102	-0.713023	-0.098893	-29.477	0.150284	2023-11-24 21:10:39
457	Session 3	ETH-2	-4.221	25.26	-5.81687	-5.30621	-11.7509	-10.0575	-23.5708	-10.169	19.8328	-10.752	-0.57092	0.532324	-7.15517	0.287111	2022-06-19 12:06:35
265	Session 3	ETH-2	-4.221	25.26	-5.88001	-5.4442	-12.0668	-10.6457	-20.6285	-10.2312	19.6917	-10.8888	-0.6886	0.215342	-3.8245	0.16686	2022-06-16 02:28:10
1561	Session 1	ETH-2	-4.221	25.26	-6.5723	-6.95376	-14.1898	-13.6221	-17.1248	-10.2053	19.7945	-10.7891	-0.627887	0.240342	3.47251	0.19133	2021-09-07 23:02:28
957	Session 5	ETH-2	-4.221	25.26	-5.81081	-5.19626	-11.7181	-9.46087	-286.018	-10.0964	20.1378	-10.4562	-0.652701	0.914077	-274.177	0.217036	2023-10-17 00:17:27
194	Session 3	ETH-2	-4.221	25.26	-5.78564	-5.16582	-11.6843	-9.97879	-22.6151	-10.1409	19.9763	-10.6128	-0.67464	0.329503	-6.49232	0.161305	2022-07-05 03:50:10
1291	Session 2	ETH-2	-4.221	25.26	-6.03477	-5.59295	-12.2918	-8.76765	-17.5168	-10.2612	19.7187	-10.8627	-0.608761	2.41384	-0.199714	0.209528	2021-10-22 03:10:08
80	Session 3	ETH-2	-4.221	25.26	-5.80149	-5.25372	-11.81	-10.2084	-28.3461	-10.1545	19.8864	-10.7	-0.698463	0.274304	-12.1295	0.136588	2022-07-04 00:03:46
956	Session 5	ETH-2	-4.221	25.26	-5.88033	-5.59257	-12.0976	-11.5734	-222.189	-10.1558	19.7343	-10.8475	-0.572916	-0.424303	-208.612	0.30177	2023-10-15 23:53:49
353	Session 4	ETH-2	-4.221	25.26	-5.87683	-5.54474	-12.1318	-11.0814	-17.7262	-10.1973	19.6767	-10.9034	-0.658379	-0.022986	-0.677293	0.185341	2022-07-30 02:18:24
479	Session 3	ETH-2	-4.221	25.26	-5.82892	-5.27545	-11.7987	-10.5779	-25.1407	-10.183	19.8643	-10.7215	-0.637201	-0.055503	-8.79895	0.217419	2022-06-18 22:06:21
1577	Session 1	ETH-2	-4.221	25.26	-6.52496	-6.84979	-13.9926	-13.4899	-17.8763	-10.1588	19.9005	-10.6863	-0.580003	0.164934	2.44812	0.242431	2021-09-07 17:20:44
961	Session 5	ETH-2	-4.221	25.26	-5.80376	-5.22053	-11.7089	-9.77224	-57.4824	-10.0881	20.113	-10.4802	-0.626682	0.648267	-41.8126	0.244656	2023-10-17 06:01:14
202	Session 3	ETH-2	-4.221	25.26	-5.7797	-5.15008	-11.5774	-10.0068	-27.9935	-10.1351	19.9924	-10.5971	-0.588267	0.269522	-11.9964	0.258022	2022-07-04 16:54:43
601	Session 3	ETH-2	-4.221	25.26	-5.76444	-5.14579	-11.6313	-9.04755	-22.7482	-10.119	19.9968	-10.5929	-0.662857	1.23012	-6.68947	0.187197	2022-06-21 13:18:40
1038	Session 5	ETH-2	-4.221	25.26	-5.83513	-5.45984	-11.9801	-10.8767	-40.7193	-10.1126	19.8694	-10.7165	-0.632035	0.013299	-24.2769	0.237536	2023-11-18 09:18:31
195	Session 3	ETH-2	-4.221	25.26	-5.86285	-5.32324	-11.9013	-10.2957	-24.4474	-10.2174	19.8154	-10.7688	-0.658515	0.325809	-7.96433	0.177341	2022-07-06 20:30:11
462	Session 3	ETH-2	-4.221	25.26	-5.86108	-5.34466	-11.8876	-9.36902	-20.9974	-10.2147	19.7935	-10.7901	-0.625315	1.30559	-4.41578	0.230645	2022-06-18 08:46:28
474	Session 3	ETH-2	-4.221	25.26	-5.81008	-5.24436	-11.8091	-10.1865	-24.0692	-10.164	19.896	-10.6907	-0.697928	0.277594	-7.79045	0.152449	2022-06-19 01:20:40
596	Session 3	ETH-2	-4.221	25.26	-5.81853	-5.27121	-11.7669	-10.4264	-24.5176	-10.172	19.8686	-10.7173	-0.61994	0.089122	-8.18479	0.233012	2022-06-21 16:54:56
126	Session 3	ETH-2	-4.221	25.26	-5.82552	-5.291	-11.7437	-10.566	-33.574	-10.1788	19.8483	-10.7369	-0.569734	-0.012212	-17.347	0.282327	2022-06-29 14:39:27
1130	Session 5	ETH-2	-4.221	25.26	-6.00581	-5.67419	-12.3061	-11.1856	-45.2376	-10.2862	19.6515	-10.9279	-0.573063	0.132018	-28.2833	0.301223	2023-11-15 17:03:31
114	Session 3	ETH-2	-4.221	25.26	-5.82782	-5.34091	-11.8337	-10.565	-32.4894	-10.1794	19.7973	-10.7864	-0.609054	0.089144	-16.1448	0.238921	2022-06-30 13:09:32
1433	Session 2	ETH-2	-4.221	25.26	-5.99512	-5.56979	-12.2263	-9.23648	-19.5828	-10.2199	19.7422	-10.8398	-0.606499	1.89305	-2.3903	0.214935	2021-10-05 06:28:22
467	Session 3	ETH-2	-4.221	25.26	-5.82692	-5.27376	-11.8525	-10.1602	-24.2242	-10.1809	19.866	-10.7198	-0.69532	0.363221	-7.87253	0.156896	2022-06-18 03:01:18
83	Session 3	ETH-2	-4.221	25.26	-5.83307	-5.31486	-11.7907	-10.184	-24.4096	-10.1859	19.8239	-10.7606	-0.585822	0.421894	-7.97399	0.261848	2022-07-03 12:08:32
1225	Session 5	ETH-2	-4.221	25.26	-5.84419	-5.32275	-11.8418	-10.1544	312.598	-10.1273	20.009	-10.581	-0.618206	0.467697	334.748	0.253635	2023-10-17 16:12:59
965	Session 5	ETH-2	-4.221	25.26	-5.81864	-5.25162	-11.8394	-9.80833	-131.321	-10.1027	20.0814	-10.5108	-0.712477	0.67434	-116.81	0.153476	2023-10-17 09:18:11
587	Session 3	ETH-2	-4.221	25.26	-5.81592	-5.22827	-11.7388	-10.0119	-23.0035	-10.1708	19.9125	-10.6747	-0.636695	0.421696	-6.73234	0.214729	2022-06-21 20:10:30
260	Session 3	ETH-2	-4.221	25.26	-5.80614	-5.2012	-11.6421	-10.2753	-23.8357	-10.1614	19.9402	-10.6478	-0.575812	0.101036	-7.64184	0.285053	2022-06-16 12:31:00
1349	Session 2	ETH-2	-4.221	25.26	-5.90096	-5.36742	-11.9733	-9.47129	-9.7462	-10.1271	19.9488	-10.6395	-0.648211	1.24806	7.11436	0.169368	2021-10-01 11:12:50
582	Session 3	ETH-2	-4.221	25.26	-5.78762	-5.13379	-11.7184	-9.87533	-24.4701	-10.1442	20.0091	-10.581	-0.738671	0.369622	-8.43855	0.104599	2022-06-22 01:06:47
1564	Session 1	ETH-2	-4.221	25.26	-6.45077	-6.58655	-13.675	-12.5159	-20.2104	-10.0897	20.169	-10.4259	-0.595478	0.621901	-0.534503	0.225533	2021-09-06 17:27:46
1529	Session 1	ETH-2	-4.221	25.26	-6.49647	-6.74631	-13.8955	-13.1767	-22.9993	-10.1323	20.0061	-10.5839	-0.613489	0.274073	-3.01549	0.206951	2021-09-09 12:56:48
1088	Session 5	ETH-2	-4.221	25.26	-5.93056	-5.56546	-12.183	-11.0573	-44.9462	-10.2102	19.762	-10.8206	-0.633941	0.043108	-28.274	0.235384	2023-11-26 05:00:04
802	Session 5	ETH-2	-4.221	25.26	-6.00514	-5.67952	-12.4836	-11.0845	-57.3145	-10.2853	19.6461	-10.9331	-0.748111	0.245024	-40.5653	0.113404	2023-11-10 14:12:15
537	Session 3	ETH-2	-4.221	25.26	-5.84528	-5.28185	-11.7752	-9.41949	-17.0633	-10.2002	19.8577	-10.7278	-0.590112	1.12814	-0.556002	0.251569	2022-07-08 18:50:18
960	Session 5	ETH-2	-4.221	25.26	-5.86333	-5.45713	-11.984	-11.1105	11.0601	-10.1427	19.8722	-10.7137	-0.609424	-0.228586	28.4157	0.263036	2023-10-15 03:19:45
84	Session 3	ETH-2	-4.221	25.26	-5.83191	-5.31744	-11.8318	-10.1963	-27.2408	-10.1846	19.8213	-10.7631	-0.626051	0.414681	-10.8491	0.219205	2022-07-02 15:39:07
972	Session 5	ETH-2	-4.221	25.26	-5.84538	-5.32846	-11.8623	-10.5785	-1.30312	-10.1283	20.0032	-10.5867	-0.632077	0.050475	15.5625	0.238964	2023-10-16 14:44:09
959	Session 5	ETH-2	-4.221	25.26	-5.82398	-5.2536	-11.7791	-10.5024	78.2266	-10.1083	20.0794	-10.5128	-0.644013	-0.023068	96.248	0.226291	2023-10-16 16:39:41
1530	Session 1	ETH-2	-4.221	25.26	-6.51588	-6.81188	-13.9609	-13.5327	-22.3966	-10.1505	19.9392	-10.6488	-0.594746	0.045216	-2.25024	0.227411	2021-09-11 15:32:39
1233	Session 5	ETH-2	-4.221	25.26	-5.78529	-5.18425	-11.6989	-10.2511	621.036	-10.0698	20.1499	-10.4444	-0.671611	0.091466	647.836	0.19679	2023-10-18 14:56:20
379	Session 3	ETH-2	-4.221	25.26	-5.82365	-5.26782	-11.8541	-10.3224	-23.7139	-10.1776	19.8721	-10.7139	-0.706193	0.187365	-7.36876	0.15304	2022-06-10 22:06:06
1092	Session 5	ETH-2	-4.221	25.26	-5.9294	-5.53795	-12.1656	-10.9049	-56.0672	-10.21	19.7901	-10.7934	-0.644718	0.141848	-39.6425	0.223864	2023-11-24 03:22:01
872	Session 5	ETH-2	-4.221	25.26	-5.95257	-5.62094	-12.2957	-10.9182	-28.8019	-10.2316	19.7056	-10.8754	-0.670361	0.295331	-11.7163	0.196136	2023-11-27 18:37:55
1437	Session 2	ETH-2	-4.221	25.26	-5.88186	-5.29052	-11.8568	-9.02287	-20.0021	-10.1096	20.0273	-10.5633	-0.626166	1.54644	-3.48796	0.193464	2021-10-04 18:11:30
307	Session 4	ETH-2	-4.221	25.26	-5.83168	-5.29451	-11.8111	-10.2739	-27.7458	-10.1584	19.9328	-10.6549	-0.628038	0.290149	-11.4076	0.216541	2022-08-02 18:32:30
1261	Session 2	ETH-2	-4.221	25.26	-5.94071	-5.39936	-11.9976	-8.03388	-21.2604	-10.1682	19.9163	-10.671	-0.599997	2.76541	-4.49067	0.221869	2021-10-07 21:22:45
588	Session 3	ETH-2	-4.221	25.26	-5.76229	-5.11215	-11.5463	-10.0135	-21.6197	-10.1179	20.0312	-10.5595	-0.612342	0.186495	-5.61084	0.242132	2022-06-21 02:48:07
120	Session 3	ETH-2	-4.221	25.26	-5.76174	-5.23862	-11.7823	-10.436	-21.3992	-10.1127	19.9018	-10.6851	-0.726586	0.013888	-5.13874	0.112287	2022-06-27 19:05:02
383	Session 3	ETH-2	-4.221	25.26	-5.82135	-5.33248	-11.8715	-10.3802	-15.9917	-10.1728	19.8059	-10.7781	-0.662352	0.259037	0.60799	0.197677	2022-06-11 08:29:32
1069	Session 5	ETH-2	-4.221	25.26	-5.72556	-5.34194	-11.7488	-10.5449	-34.3423	-10.0004	19.9892	-10.6003	-0.628258	0.111633	-18.1346	0.241418	2023-11-20 20:04:22
1222	Session 5	ETH-2	-4.221	25.26	-5.84062	-5.3075	-11.8234	-9.89817	-64.5164	-10.1241	20.0246	-10.566	-0.618365	0.695974	-48.7625	0.253444	2023-10-17 23:54:06
90	Session 3	ETH-2	-4.221	25.26	-5.85562	-5.35289	-11.9575	-10.1752	-30.0636	-10.2086	19.7851	-10.7983	-0.693561	0.507273	-13.6252	0.14415	2022-07-03 02:04:27
1568	Session 1	ETH-2	-4.221	25.26	-6.4977	-6.75886	-13.95	-13.2623	-18.8815	-10.1332	19.9933	-10.5963	-0.655028	0.212531	1.21274	0.16277	2021-09-06 22:24:06
1136	Session 5	ETH-2	-4.221	25.26	-6.00211	-5.70074	-12.4214	-11.1627	-67.7394	-10.2813	19.6244	-10.9541	-0.667296	0.208561	-51.1387	0.200034	2023-11-13 17:47:40
1539	Session 1	ETH-2	-4.221	25.26	-6.71096	-7.34028	-14.6608	-14.4583	-20.8697	-10.3384	19.4004	-11.1714	-0.578997	0.170854	0.563032	0.244128	2021-09-09 01:08:14
261	Session 3	ETH-2	-4.221	25.26	-5.75356	-5.23294	-11.658	-9.98222	-20.3557	-10.1042	19.9076	-10.6794	-0.615075	0.461036	-4.09784	0.245119	2022-06-15 16:11:11
1496	Session 1	ETH-2	-4.221	25.26	-6.59284	-7.00509	-14.2481	-13.8046	-14.7117	-10.2252	19.7422	-10.8399	-0.614876	0.15864	6.06057	0.204831	2021-09-02 12:39:26
592	Session 3	ETH-2	-4.221	25.26	-5.74454	-5.09219	-11.5364	-10.0177	-20.5274	-10.0998	20.0516	-10.5398	-0.640407	0.142115	-4.55876	0.212559	2022-06-20 21:56:34
1534	Session 1	ETH-2	-4.221	25.26	-6.4888	-6.74291	-13.8832	-13.2328	-20.3635	-10.1243	20.0095	-10.5805	-0.612359	0.210327	-0.340681	0.208132	2021-09-09 08:06:23
1042	Session 5	ETH-2	-4.221	25.26	-6.07535	-5.88774	-12.6744	-11.4559	-20.6894	-10.3523	19.4342	-11.1387	-0.662554	0.288231	-2.80409	0.205061	2023-11-17 19:12:42
540	Session 3	ETH-2	-4.221	25.26	-5.78797	-5.21564	-11.6857	-10.0374	-21.7644	-10.1415	19.9254	-10.6622	-0.624431	0.370437	-5.52722	0.21395	2022-07-08 08:42:50
1339	Session 2	ETH-2	-4.221	25.26	-5.90303	-5.37244	-11.9676	-7.97683	-14.4776	-10.1291	19.9437	-10.6444	-0.635281	2.76879	2.3145	0.184319	2021-09-29 23:59:57
1218	Session 5	ETH-2	-4.221	25.26	-5.81941	-5.26159	-11.8133	-9.94572	-9.89328	-10.1032	20.0713	-10.5207	-0.675475	0.555546	6.66623	0.192703	2023-10-18 07:37:12
795	Session 5	ETH-2	-4.221	25.26	-6.04322	-5.86123	-12.6392	-11.6446	-56.4499	-10.3191	19.4611	-11.1125	-0.686483	0.044017	-39.3011	0.179536	2023-11-11 22:36:06
1663	Session 2	ETH-2	-4.221	25.26	-5.90272	-5.27433	-11.8607	-8.94027	-22.0863	-10.1324	20.0439	-10.5472	-0.624473	1.59733	-5.61687	0.196451	2021-09-28 22:04:30
950	Session 5	ETH-3	-4.221	25.26	5.9385	12.0257	17.7413	24.7539	5.23525	1.76737	37.6498	6.53068	-0.275376	0.544742	-24.2792	0.62083	2023-10-17 01:15:55
951	Session 5	ETH-3	-4.221	25.26	5.95986	12.0296	17.792	25.2452	64.4837	1.78994	37.6537	6.53448	-0.251192	1.01677	33.1985	0.646399	2023-10-17 05:04:06
1169	Session 5	ETH-3	-4.221	25.26	6.04945	12.2243	18.0575	24.889	104.83	1.87811	37.8518	6.72664	-0.27148	0.284051	71.8521	0.622095	2023-10-21 09:10:53
1167	Session 5	ETH-3	-4.221	25.26	6.00705	12.1796	18.0398	25.4366	487.593	1.83466	37.8064	6.68254	-0.201916	0.906968	443.38	0.696439	2023-10-21 01:34:22
1328	Session 2	ETH-3	-4.221	25.26	5.86645	11.9887	17.7019	22.093	7.2466	1.7609	37.6564	6.5371	-0.20426	-1.98037	-22.1821	0.657045	2021-09-30 00:52:08
940	Session 5	ETH-3	-4.221	25.26	5.947	12.0197	17.8252	24.2378	-227.857	1.77663	37.6437	6.52477	-0.195903	0.052655	-250.526	0.705502	2023-10-16 17:36:27
1329	Session 2	ETH-3	-4.221	25.26	5.87288	11.9521	17.619	22.041	3.0349	1.76908	37.6189	6.50075	-0.256753	-1.95887	-26.2081	0.599657	2021-09-29 21:31:26
990	Session 5	ETH-3	-4.221	25.26	5.88319	12.0411	17.6436	24.149	-59.097	1.70798	37.6656	6.54606	-0.329654	-0.076362	-86.6965	0.559898	2023-10-23 17:54:36
941	Session 5	ETH-3	-4.221	25.26	5.95311	12.0535	17.7329	24.4169	69.9362	1.7819	37.6781	6.55813	-0.325606	0.160725	38.4499	0.567805	2023-10-16 15:42:19
980	Session 5	ETH-3	-4.221	25.26	6.13617	12.4988	18.3603	25.0285	18.116	1.96031	38.1311	6.99758	-0.329509	-0.122138	-12.8905	0.563802	2023-10-16 13:46:29
949	Session 5	ETH-3	-4.221	25.26	5.88054	11.7817	17.4165	23.3437	-29.1844	1.71466	37.4014	6.28974	-0.297966	-0.350131	-57.1837	0.597903	2023-10-13 22:55:02
952	Session 5	ETH-3	-4.221	25.26	5.89429	11.8365	17.4979	23.282	12.7904	1.72728	37.4572	6.34388	-0.285388	-0.518736	-16.5385	0.611199	2023-10-14 04:04:33
946	Session 5	ETH-3	-4.221	25.26	5.93338	12.0731	17.7362	25.0804	77.3526	1.76019	37.6981	6.57756	-0.321224	0.769694	45.6301	0.572191	2023-10-16 23:20:36
989	Session 5	ETH-3	-4.221	25.26	5.98099	12.1068	17.8269	24.428	-48.4907	1.8096	37.7323	6.61069	-0.313547	0.066334	-76.6146	0.577189	2023-10-23 14:10:36
1172	Session 5	ETH-3	-4.221	25.26	6.02167	12.1348	17.8912	25.0518	184.091	1.85183	37.7608	6.63832	-0.319415	0.619805	148.98	0.571105	2023-10-21 07:15:47
1171	Session 5	ETH-3	-4.221	25.26	5.98821	12.1404	17.8591	25.0434	348.994	1.81605	37.7665	6.64386	-0.321943	0.60066	309.026	0.56855	2023-10-21 03:28:12
943	Session 5	ETH-3	-4.221	25.26	5.92059	11.9933	17.6757	24.6252	-200.461	1.74951	37.6169	6.49877	-0.289997	0.483078	-223.873	0.60542	2023-10-16 21:25:09
1688	Session 2	ETH-3	-4.221	25.26	5.8193	11.8373	17.489	23.535	6.15056	1.71625	37.5018	6.38715	-0.218093	-0.273267	-22.9101	0.63819	2021-09-26 15:54:50
1204	Session 5	ETH-3	-4.221	25.26	5.99604	12.2254	18.0038	24.6205	775.021	1.82127	37.8531	6.72784	-0.270455	0.019765	722.132	0.625012	2023-10-18 15:55:01
1689	Session 2	ETH-3	-4.221	25.26	5.87536	12.0104	17.7141	21.8379	11.6021	1.76959	37.6785	6.55851	-0.222476	-2.27208	-18.0043	0.633772	2021-09-26 19:22:13
1202	Session 5	ETH-3	-4.221	25.26	5.94467	12.0957	17.8083	24.5785	36.7222	1.77137	37.7211	6.59985	-0.283916	0.235101	6.13992	0.611144	2023-10-18 00:53:23
1170	Session 5	ETH-3	-4.221	25.26	5.89032	11.9816	17.7282	24.2664	814.16	1.71774	37.605	6.4872	-0.195926	0.156021	761.136	0.703745	2023-10-19 15:15:38
1646	Session 2	ETH-3	-4.221	25.26	5.86027	11.9732	17.6707	21.683	6.76845	1.75489	37.6405	6.52168	-0.213485	-2.35008	-22.6104	0.645787	2021-09-28 22:56:46
1207	Session 5	ETH-3	-4.221	25.26	5.96474	12.1065	17.8853	24.8858	-106.037	1.79233	37.732	6.61046	-0.239275	0.513709	-132.444	0.658475	2023-10-18 04:44:23
1327	Session 2	ETH-3	-4.221	25.26	5.78382	11.7859	17.3762	21.0261	5.20637	1.68037	37.4493	6.3362	-0.24252	-2.62234	-23.6927	0.615673	2021-09-30 07:47:46
1212	Session 5	ETH-3	-4.221	25.26	6.03534	12.3094	18.1295	24.9777	76.9781	1.85999	37.9385	6.81075	-0.268909	0.2024	44.6744	0.626205	2023-10-19 07:24:03
1215	Session 5	ETH-3	-4.221	25.26	5.99319	12.2573	18.0979	24.877	-3.01748	1.81707	37.8856	6.7594	-0.206129	0.20705	-32.7808	0.693054	2023-10-19 05:30:23
1652	Session 2	ETH-3	-4.221	25.26	5.80992	11.8945	17.5078	21.3836	8.38494	1.70417	37.5603	6.44382	-0.245532	-2.4873	-20.8392	0.610174	2021-09-28 07:07:33
939	Session 5	ETH-3	-4.221	25.26	5.91983	11.8196	17.5532	23.4445	130.782	1.75506	37.44	6.32716	-0.240888	-0.326618	98.0422	0.658127	2023-10-15 05:52:52
1242	Session 5	ETH-3	-4.221	25.26	5.9675	12.1364	17.906	24.7934	36.8891	1.79417	37.7625	6.63997	-0.250806	0.364453	6.19805	0.646091	2023-10-18 08:36:18
1685	Session 2	ETH-3	-4.221	25.26	5.87756	12.0757	17.7592	21.5996	9.44121	1.76954	37.7452	6.62326	-0.243904	-2.63362	-20.2286	0.610154	2021-09-26 06:59:25
1647	Session 2	ETH-3	-4.221	25.26	5.85004	11.9192	17.6111	22.1952	5.89623	1.74597	37.5854	6.46825	-0.209131	-1.74349	-23.3443	0.65024	2021-09-28 19:36:54
1214	Session 5	ETH-3	-4.221	25.26	6.02384	12.2187	18.0019	24.7614	160.563	1.85108	37.8461	6.72114	-0.294347	0.17059	125.964	0.599306	2023-10-19 01:29:58
1209	Session 5	ETH-3	-4.221	25.26	6.02105	12.2344	18.0643	24.8253	120.822	1.84753	37.8621	6.73665	-0.245435	0.201938	87.3779	0.651399	2023-10-18 23:36:12
1651	Session 2	ETH-3	-4.221	25.26	5.81736	11.8211	17.4289	22.4303	15.9382	1.71478	37.4853	6.37107	-0.259369	-1.32023	-13.3721	0.59543	2021-09-28 10:31:26
1241	Session 5	ETH-3	-4.221	25.26	6.04207	12.2579	18.1133	24.8783	67.8053	1.86903	37.8861	6.75987	-0.241709	0.207121	35.8728	0.655649	2023-10-18 14:00:59
1206	Session 5	ETH-3	-4.221	25.26	6.02034	12.2358	18.0698	24.6576	-25.4667	1.84673	37.8636	6.73811	-0.240736	0.035373	-54.5476	0.65646	2023-10-18 21:42:49
942	Session 5	ETH-3	-4.221	25.26	6.00113	12.1354	17.985	24.0799	-2.70923	1.82997	37.7614	6.63889	-0.206741	-0.329967	-32.2608	0.694495	2023-10-15 00:43:09
1203	Session 5	ETH-3	-4.221	25.26	5.98249	12.1183	17.8806	24.5157	-101.326	1.81077	37.744	6.62204	-0.273542	0.129248	-127.91	0.62169	2023-10-18 17:55:00
953	Session 5	ETH-3	-4.221	25.26	5.88504	11.7947	17.4888	23.1393	41.1311	1.71896	37.4147	6.30267	-0.244266	-0.575606	11.0733	0.654686	2023-10-14 16:59:50
1173	Session 5	ETH-3	-4.221	25.26	5.91624	11.982	17.6489	24.5421	88.8808	1.74529	37.6054	6.48762	-0.300916	0.424249	57.0249	0.591972	2023-10-19 17:06:44
1205	Session 5	ETH-3	-4.221	25.26	5.92427	12.039	17.7182	24.7251	385.242	1.75175	37.6634	6.54387	-0.2964	0.49029	344.555	0.597933	2023-10-17 22:57:11
1655	Session 2	ETH-3	-4.221	25.26	5.85836	11.9596	17.6648	21.5345	8.73719	1.75335	37.6267	6.50824	-0.204124	-2.46831	-20.6713	0.65449	2021-09-27 23:47:09
1164	Session 5	ETH-3	-4.221	25.26	5.99736	12.1783	17.958	25.1218	-1495.16	1.82439	37.8051	6.68133	-0.271072	0.602103	-1480.45	0.622858	2023-10-20 23:38:36
1161	Session 5	ETH-3	-4.221	25.26	5.89239	12.1596	17.8228	24.3212	160.195	1.71343	37.7863	6.66309	-0.278062	-0.14236	125.893	0.615545	2023-10-20 19:51:11
1162	Session 5	ETH-3	-4.221	25.26	5.98015	12.1481	17.9078	24.4953	-106.472	1.80719	37.7743	6.6515	-0.273359	0.050359	-132.951	0.620618	2023-10-20 17:55:51
1201	Session 5	ETH-3	-4.221	25.26	5.98743	12.1545	17.8989	24.4252	88.6205	1.8147	37.7809	6.65785	-0.295839	-0.030767	56.3388	0.59675	2023-10-20 15:58:10
948	Session 5	ETH-3	-4.221	25.26	5.95454	12.1104	17.7746	24.8857	251.23	1.78133	37.7361	6.61435	-0.341366	0.505923	214.272	0.550523	2023-10-17 06:57:57
1722	Session 2	ETH-3	-4.221	25.26	5.82479	11.9382	17.5967	21.3379	7.74146	1.7184	37.6049	6.48708	-0.215819	-2.61802	-21.5625	0.641323	2021-09-27 02:34:29
1166	Session 5	ETH-3	-4.221	25.26	5.99428	12.1965	17.991	25.2155	2586.91	1.82045	37.8237	6.69934	-0.253242	0.657571	2480.24	0.642228	2023-10-20 08:30:53
1649	Session 2	ETH-3	-4.221	25.26	5.86346	11.8973	17.5865	21.2226	12.6421	1.76106	37.5629	6.44643	-0.225724	-2.65	-16.7665	0.633112	2021-09-29 09:58:13
1721	Session 2	ETH-3	-4.221	25.26	5.88413	11.9619	17.655	22.2405	14.6489	1.78069	37.6289	6.51045	-0.242449	-1.78345	-14.9632	0.612818	2021-09-27 06:06:56
981	Session 5	ETH-3	-4.221	25.26	5.90532	11.8914	17.6165	23.6948	29.5794	1.737	37.5131	6.39813	-0.23356	-0.224102	-0.354121	0.6657	2023-10-16 02:28:32
1165	Session 5	ETH-3	-4.221	25.26	5.97381	12.1625	17.8775	24.98	113.207	1.79992	37.789	6.66571	-0.310617	0.495108	80.1955	0.581219	2023-10-20 06:34:16
945	Session 5	ETH-3	-4.221	25.26	5.89241	11.7977	17.448	23.4785	-40.3404	1.72669	37.4177	6.30553	-0.294758	-0.250051	-68.0586	0.600761	2023-10-15 21:20:13
1160	Session 5	ETH-3	-4.221	25.26	5.95486	12.0652	17.7693	24.5195	-472.95	1.78332	37.6901	6.56973	-0.303091	0.237714	-488.473	0.589362	2023-10-20 02:39:09
1211	Session 5	ETH-3	-4.221	25.26	5.93992	12.0474	17.7809	24.4375	56.1391	1.76809	37.6719	6.55214	-0.259002	0.192875	25.0853	0.637879	2023-10-17 17:11:04
1648	Session 2	ETH-3	-4.221	25.26	5.82042	11.8798	17.4658	20.9658	8.27698	1.71588	37.5452	6.42919	-0.283157	-2.8663	-20.9269	0.570562	2021-09-29 06:15:02
1163	Session 5	ETH-3	-4.221	25.26	5.95607	12.1007	17.8272	24.8054	1083.04	1.78332	37.7262	6.60477	-0.281833	0.446655	1021.55	0.612053	2023-10-20 00:42:13
944	Session 5	ETH-3	-4.221	25.26	5.90574	11.7658	17.4891	23.3058	-47.6252	1.74204	37.3852	6.27406	-0.237178	-0.355887	-75.0889	0.661965	2023-10-15 16:14:09
1321	Session 2	ETH-3	-4.221	25.26	5.80474	11.7956	17.4078	22.5731	11.2847	1.70227	37.4592	6.34584	-0.242408	-1.13045	-17.8296	0.615966	2021-09-30 11:13:07
1168	Session 5	ETH-3	-4.221	25.26	5.9562	12.0745	17.7691	24.4134	83.9648	1.78441	37.6994	6.57884	-0.313608	0.115892	52.0194	0.578303	2023-10-19 22:49:55
1210	Session 5	ETH-3	-4.221	25.26	5.92242	12.0079	17.6906	24.8071	96.2206	1.75092	37.6318	6.5132	-0.291463	0.631826	64.0895	0.603244	2023-10-17 21:00:51
1213	Session 5	ETH-3	-4.221	25.26	5.94788	12.1162	17.8508	24.6999	203.759	1.77404	37.742	6.62012	-0.265409	0.313003	168.199	0.631139	2023-10-17 13:20:49
947	Session 5	ETH-3	-4.221	25.26	5.91737	11.8016	17.4076	23.5419	33.4808	1.75309	37.4217	6.3094	-0.363852	-0.195981	3.5961	0.527843	2023-10-14 09:15:19
150	Session 3	ETH-3	-4.221	25.26	5.90399	11.9714	17.7031	23.8971	3.89228	1.69331	37.4837	6.36959	-0.224774	-0.184572	-25.4444	0.65746	2022-06-22 17:31:04
988	Session 5	ETH-3	-4.221	25.26	5.93462	12.1236	17.8557	24.1512	361.187	1.75967	37.7495	6.62744	-0.254159	-0.237206	320.975	0.640104	2023-10-24 00:37:26
1029	Session 5	ETH-3	-4.221	25.26	5.89508	12.1091	17.8036	24.1719	58.1674	1.71814	37.7349	6.61322	-0.250738	-0.188347	26.9796	0.632916	2023-11-18 10:24:54
1027	Session 5	ETH-3	-4.221	25.26	5.87092	11.9069	17.5637	24.1284	35.402	1.69984	37.529	6.41349	-0.265177	0.168769	5.30566	0.617588	2023-11-18 05:47:46
1552	Session 1	ETH-3	-4.221	25.26	5.06722	10.0808	14.9682	21.543	8.03432	1.53928	37.1522	6.04798	-0.218719	1.25432	-16.9494	0.631647	2021-09-07 11:58:41
1582	Session 1	ETH-3	-4.221	25.26	5.20058	10.3129	15.3176	21.0346	11.6301	1.67253	37.3887	6.2774	-0.237246	0.29637	-14.0275	0.612139	2021-09-07 16:30:20
1581	Session 1	ETH-3	-4.221	25.26	5.2483	10.4197	15.5077	21.0813	10.7339	1.71933	37.4976	6.38305	-0.202932	0.130597	-15.1554	0.648852	2021-09-07 18:08:49
1031	Session 5	ETH-3	-4.221	25.26	5.87377	11.9523	17.5921	24.1018	36.6721	1.70121	37.5752	6.4583	-0.284253	0.053148	6.44712	0.597434	2023-11-17 11:50:56
1032	Session 5	ETH-3	-4.221	25.26	5.7705	11.6903	17.2441	23.5431	38.3176	1.60096	37.3086	6.19975	-0.265828	0.02529	8.66793	0.617659	2023-11-17 02:23:46
1033	Session 5	ETH-3	-4.221	25.26	5.79923	11.881	17.4207	24.0556	71.1107	1.62453	37.5028	6.3881	-0.307058	0.148896	40.1077	0.573309	2023-11-16 21:51:38
1122	Session 5	ETH-3	-4.221	25.26	5.78124	11.6865	17.2184	23.4745	10.6911	1.61252	37.3048	6.19599	-0.298409	-0.034317	-18.1736	0.582877	2023-11-15 15:57:46
1121	Session 5	ETH-3	-4.221	25.26	5.83143	11.6889	17.3152	23.4031	36.9666	1.66582	37.307	6.19818	-0.257051	-0.108648	7.29338	0.627451	2023-11-15 09:43:50
1548	Session 1	ETH-3	-4.221	25.26	5.18208	10.2861	15.2325	21.0103	9.20718	1.65385	37.3614	6.25093	-0.275997	0.325622	-16.3184	0.570843	2021-09-07 21:26:14
1550	Session 1	ETH-3	-4.221	25.26	5.36437	10.4947	15.683	22.6273	74.1863	1.83995	37.5739	6.45706	-0.222436	1.49611	46.3903	0.628328	2021-09-08 11:28:08
1119	Session 5	ETH-3	-4.221	25.26	5.77737	11.5769	17.1768	23.1736	48.39	1.61241	37.1932	6.08775	-0.228831	-0.111653	18.6696	0.658084	2023-11-15 01:48:02
1553	Session 1	ETH-3	-4.221	25.26	5.15401	10.2563	15.1882	20.9923	12.9624	1.6251	37.331	6.22146	-0.261753	0.367021	-12.5715	0.586156	2021-09-08 13:06:28
1551	Session 1	ETH-3	-4.221	25.26	5.10555	10.1451	15.0576	21.5457	8.85292	1.57767	37.2177	6.11149	-0.232478	1.12959	-16.3141	0.617	2021-09-07 09:31:00
1120	Session 5	ETH-3	-4.221	25.26	5.7777	11.6928	17.2495	23.5007	30.9797	1.60853	37.3112	6.20223	-0.270411	-0.021208	1.52704	0.613465	2023-11-14 21:15:00
1125	Session 5	ETH-3	-4.221	25.26	5.73178	11.6268	17.1404	24.6894	23.2783	1.5621	37.244	6.13707	-0.266306	1.27099	-5.77834	0.618278	2023-11-14 02:44:07
1528	Session 1	ETH-3	-4.221	25.26	5.11482	10.1534	15.0368	21.0868	6.15378	1.58721	37.2261	6.11968	-0.270576	0.663483	-18.9713	0.576711	2021-09-08 21:04:10
1525	Session 1	ETH-3	-4.221	25.26	5.02529	9.89162	14.7192	20.6869	9.41968	1.50165	36.9592	5.86077	-0.236848	0.790187	-15.1922	0.613134	2021-09-09 00:18:43
1127	Session 5	ETH-3	-4.221	25.26	5.76954	11.6609	17.2287	23.8115	44.3302	1.60101	37.2787	6.17073	-0.2514	0.345565	14.5678	0.634484	2023-11-13 18:53:49
1524	Session 1	ETH-3	-4.221	25.26	4.94355	9.67711	14.4294	19.7558	7.13517	1.42262	36.7405	5.6486	-0.229637	0.302067	-16.9255	0.621006	2021-09-09 01:53:44
1522	Session 1	ETH-3	-4.221	25.26	5.2632	10.5952	15.6778	21.6287	1.89021	1.72875	37.6767	6.55677	-0.221543	0.319156	-24.1211	0.629805	2021-09-09 07:17:10
1520	Session 1	ETH-3	-4.221	25.26	5.25256	10.4469	15.471	21.4592	6.5948	1.72287	37.5253	6.4099	-0.269875	0.447007	-19.2447	0.577532	2021-09-09 08:51:42
784	Session 5	ETH-3	-4.221	25.26	5.74399	11.6471	17.1096	23.2762	0.635855	1.57434	37.2647	6.15713	-0.328818	-0.150143	-27.8289	0.551639	2023-11-11 21:26:00
783	Session 5	ETH-3	-4.221	25.26	5.75535	11.6848	17.2153	23.5328	25.3098	1.58505	37.3031	6.19434	-0.273272	0.026119	-3.94174	0.611402	2023-11-11 15:21:11
780	Session 5	ETH-3	-4.221	25.26	5.78453	11.6368	17.2346	23.3833	51.7309	1.61783	37.2542	6.1469	-0.237605	-0.025211	21.7892	0.649926	2023-11-11 05:41:01
781	Session 5	ETH-3	-4.221	25.26	5.81924	11.7929	17.4138	23.8714	29.3256	1.64905	37.413	6.30095	-0.248717	0.143224	-0.318019	0.638048	2023-11-11 01:09:36
1523	Session 1	ETH-3	-4.221	25.26	5.28601	10.602	15.6961	21.6549	9.14623	1.75274	37.6835	6.56342	-0.233434	0.331478	-17.0902	0.617095	2021-09-09 12:09:04
1546	Session 1	ETH-3	-4.221	25.26	5.25758	10.5682	15.6473	21.5451	2.27538	1.72377	37.6491	6.52997	-0.219473	0.290905	-23.6887	0.632384	2021-09-10 12:30:08
1521	Session 1	ETH-3	-4.221	25.26	5.24369	10.4497	15.5635	21.0974	6.32053	1.71334	37.5282	6.41271	-0.172437	0.087083	-19.508	0.683644	2021-09-11 13:52:36
1526	Session 1	ETH-3	-4.221	25.26	5.16789	10.2367	15.1703	21.2468	10.0935	1.64057	37.311	6.20209	-0.274604	0.655141	-15.3451	0.572365	2021-09-08 19:24:25
1030	Session 5	ETH-3	-4.221	25.26	5.86543	11.9089	17.5615	23.8987	23.0291	1.69392	37.5311	6.41551	-0.263614	-0.05954	-6.70578	0.618947	2023-11-18 20:04:28
1547	Session 1	ETH-3	-4.221	25.26	5.16961	10.2725	15.2635	20.9787	6.19265	1.64109	37.3475	6.23748	-0.219371	0.321549	-19.2177	0.630788	2021-09-07 06:15:24
1549	Session 1	ETH-3	-4.221	25.26	5.14445	10.2124	15.1419	20.768	7.56835	1.61655	37.2862	6.17801	-0.25488	0.2342	-17.7357	0.593101	2021-09-07 04:35:45
723	Session 5	ETH-3	-4.221	25.26	5.74821	11.6179	17.1456	23.2837	2.52259	1.5799	37.235	6.12829	-0.269429	-0.085119	-25.9449	0.609358	2023-12-01 12:25:04
1487	Session 1	ETH-3	-4.221	25.26	5.24312	10.4985	15.5797	21.3517	10.8139	1.71095	37.578	6.46106	-0.203428	0.239429	-15.223	0.645416	2021-09-01 19:02:32
724	Session 5	ETH-3	-4.221	25.26	5.71815	11.4315	16.8953	22.8336	51.5298	1.55475	37.0452	5.94422	-0.30355	-0.156477	22.0733	0.572785	2023-12-01 06:15:23
726	Session 5	ETH-3	-4.221	25.26	5.75289	11.6346	17.1174	23.4784	35.5055	1.58427	37.252	6.14477	-0.318207	0.072185	6.0638	0.557003	2023-11-30 20:46:04
725	Session 5	ETH-3	-4.221	25.26	5.70674	11.6525	17.1413	24.0036	22.3307	1.53453	37.2703	6.16254	-0.264738	0.550022	-6.72233	0.614847	2023-11-30 15:55:05
1491	Session 1	ETH-3	-4.221	25.26	5.285	10.4619	15.58	21.2307	9.38774	1.7568	37.5405	6.42468	-0.210396	0.193496	-16.5859	0.638344	2021-09-01 20:37:41
864	Session 5	ETH-3	-4.221	25.26	5.77918	11.6653	17.2432	23.3817	5.39083	1.61111	37.2831	6.175	-0.251303	-0.082912	-23.28	0.62942	2023-11-29 20:57:41
861	Session 5	ETH-3	-4.221	25.26	5.75164	11.669	17.2231	23.5281	25.6653	1.58168	37.287	6.17877	-0.246416	0.052726	-3.56194	0.635028	2023-11-29 04:50:59
1492	Session 1	ETH-3	-4.221	25.26	5.24896	10.5046	15.584	21.3455	9.83159	1.71693	37.5842	6.46704	-0.211073	0.221373	-16.1976	0.637827	2021-09-01 23:55:06
1519	Session 1	ETH-3	-4.221	25.26	5.14337	10.2818	15.2654	20.9979	12.9159	1.61286	37.357	6.24671	-0.199617	0.322034	-12.6546	0.649581	2021-09-02 01:32:33
1518	Session 1	ETH-3	-4.221	25.26	5.22948	10.4015	15.4083	21.217	12.6683	1.7	37.4791	6.36509	-0.263846	0.299475	-13.216	0.58334	2021-09-02 07:01:56
865	Session 5	ETH-3	-4.221	25.26	5.73675	11.5854	17.0929	23.1917	47.873	1.5689	37.2019	6.09622	-0.277942	-0.110711	18.1944	0.601526	2023-11-28 05:55:15
1489	Session 1	ETH-3	-4.221	25.26	5.0705	10.2288	15.1031	20.7694	10.4064	1.53735	37.3032	6.1945	-0.233182	0.202956	-14.9232	0.615017	2021-09-02 08:37:36
1081	Session 5	ETH-3	-4.221	25.26	5.73327	11.6304	17.1707	23.3153	26.7392	1.56355	37.2477	6.14067	-0.241551	-0.078952	-2.42441	0.641193	2023-11-25 21:36:10
1488	Session 1	ETH-3	-4.221	25.26	5.2266	10.5415	15.5539	21.4471	7.47673	1.69181	37.622	6.5037	-0.253673	0.247633	-18.5391	0.594048	2021-09-02 11:52:44
1078	Session 5	ETH-3	-4.221	25.26	5.73682	11.6609	17.2756	21.5876	-4.38064	1.56622	37.2788	6.17077	-0.171719	-1.82727	-32.7212	0.716641	2023-11-25 12:18:03
1079	Session 5	ETH-3	-4.221	25.26	5.8729	11.9258	17.5639	24.0153	31.9798	1.70126	37.5482	6.43215	-0.285332	0.020971	1.94405	0.594059	2023-11-25 07:45:42
1554	Session 1	ETH-3	-4.221	25.26	5.29081	10.6037	15.6446	21.7008	10.6268	1.75779	37.6852	6.56506	-0.290748	0.373117	-15.6563	0.555312	2021-09-06 23:11:19
1555	Session 1	ETH-3	-4.221	25.26	5.27941	10.5453	15.5855	21.6756	10.6303	1.7478	37.6257	6.50733	-0.280506	0.463963	-15.5293	0.566109	2021-09-06 21:31:01
1068	Session 5	ETH-3	-4.221	25.26	5.71347	11.6107	17.1238	23.2779	60.4578	1.54322	37.2277	6.12125	-0.248244	-0.076467	30.3975	0.635352	2023-11-20 21:14:18
1557	Session 1	ETH-3	-4.221	25.26	5.28734	10.5933	15.6574	21.9465	5.70164	1.75448	37.6746	6.55476	-0.264417	0.634305	-20.43	0.583052	2021-09-06 18:12:52
1067	Session 5	ETH-3	-4.221	25.26	5.73946	11.512	16.9959	22.8536	-150.36	1.57447	37.1271	6.02369	-0.304721	-0.296085	-174.309	0.574407	2023-11-21 08:26:19
1556	Session 1	ETH-3	-4.221	25.26	5.23229	10.5132	15.5512	21.8152	4.4072	1.6989	37.593	6.47562	-0.234662	0.664305	-21.4813	0.614231	2021-09-06 16:40:18
787	Session 5	ETH-3	-4.221	25.26	5.77358	11.6209	17.1589	23.765	52.6022	1.60678	37.2379	6.13113	-0.28523	0.379456	22.6793	0.599293	2023-11-10 06:56:37
1086	Session 5	ETH-3	-4.221	25.26	5.73662	11.6552	17.1963	23.4825	298.95	1.56622	37.2729	6.16509	-0.243872	0.035549	261.989	0.639741	2023-11-23 23:57:43
1083	Session 5	ETH-3	-4.221	25.26	5.74324	11.6479	17.1787	23.3508	67.3741	1.57352	37.2655	6.1579	-0.260952	-0.078767	37.0102	0.620992	2023-11-24 13:53:56
1517	Session 1	ETH-3	-4.221	25.26	5.22601	10.3147	15.3398	20.6792	7.26964	1.69948	37.3905	6.27912	-0.243165	-0.05536	-18.3072	0.605081	2021-09-03 19:34:09
1082	Session 5	ETH-3	-4.221	25.26	5.77348	11.6573	17.1523	23.2771	21.4596	1.60534	37.275	6.1671	-0.326969	-0.169295	-7.64809	0.5497	2023-11-24 20:05:27
1516	Session 1	ETH-3	-4.221	25.26	5.23735	10.3895	15.4845	20.9824	8.93953	1.70881	37.4667	6.35311	-0.18508	0.093663	-16.8345	0.665735	2021-09-03 16:43:10
1493	Session 1	ETH-3	-4.221	25.26	5.17601	10.2807	15.2535	20.6606	12.1704	1.64759	37.3559	6.24563	-0.243818	-0.006449	-13.4134	0.604262	2021-09-03 10:47:46
1490	Session 1	ETH-3	-4.221	25.26	5.21312	10.3612	15.3902	21.1264	11.6948	1.68409	37.438	6.32524	-0.225612	0.290498	-14.0702	0.623229	2021-09-02 14:19:20
1087	Session 5	ETH-3	-4.221	25.26	5.7619	11.6896	17.2277	23.5958	75.6238	1.59184	37.308	6.19911	-0.272492	0.078043	44.9198	0.608751	2023-11-24 04:29:15
790	Session 5	ETH-3	-4.221	25.26	5.76455	11.7025	17.1902	25.1562	57.8287	1.59419	37.321	6.21176	-0.324534	1.57726	27.6041	0.557256	2023-11-09 20:49:39
1527	Session 1	ETH-3	-4.221	25.26	5.44774	10.9278	16.173	21.9886	8.42382	1.91272	38.0156	6.88554	-0.246943	0.013408	-18.584	0.602563	2021-09-11 23:55:23
789	Session 5	ETH-3	-4.221	25.26	5.76412	11.6643	17.1288	26.3928	-2116.46	1.59513	37.2822	6.17406	-0.347354	2.86108	-2084.64	0.532922	2023-11-09 16:15:28
1583	Session 2	ETH-3	-4.221	25.26	5.84244	11.9797	17.6124	21.3922	10.422	1.73567	37.6473	6.52821	-0.258805	-2.64695	-19.0574	0.590779	2021-09-18 06:12:46
901	Session 5	ETH-3	-4.221	25.26	6.02074	12.2884	18.1334	26.1203	52.655	1.84522	37.9172	6.79003	-0.229748	1.35894	21.1383	0.662756	2023-10-29 01:21:27
1585	Session 2	ETH-3	-4.221	25.26	5.82472	11.9454	17.5751	22.6901	4.51341	1.71806	37.6123	6.49427	-0.244049	-1.3119	-24.7103	0.606364	2021-09-18 09:39:59
1586	Session 2	ETH-3	-4.221	25.26	5.84348	12.0107	17.642	21.7602	5.61446	1.73564	37.6789	6.55888	-0.260909	-2.34859	-23.7844	0.588764	2021-09-18 11:59:02
899	Session 5	ETH-3	-4.221	25.26	5.92933	12.0037	17.7105	24.38	64.8048	1.75843	37.6274	6.509	-0.27484	0.223095	33.5955	0.614855	2023-10-28 18:48:27
900	Session 5	ETH-3	-4.221	25.26	5.93714	11.9592	17.7207	24.022	69.001	1.76836	37.5821	6.46498	-0.22958	-0.038371	37.7499	0.663325	2023-10-28 15:05:15
1609	Session 2	ETH-3	-4.221	25.26	5.82591	11.8746	17.5072	21.8184	9.44565	1.72191	37.5399	6.42409	-0.24322	-2.02348	-19.7881	0.607474	2021-09-18 16:32:44
906	Session 5	ETH-3	-4.221	25.26	5.93262	11.9723	17.6601	26.4641	79.515	1.76308	37.5954	6.47791	-0.297157	2.32041	47.9349	0.591374	2023-10-28 04:45:37
1608	Session 2	ETH-3	-4.221	25.26	5.77917	11.6852	17.2478	20.9461	6.32401	1.6791	37.3465	6.23643	-0.266067	-2.50202	-22.4113	0.583464	2021-09-18 18:08:49
907	Session 5	ETH-3	-4.221	25.26	5.93595	12.076	17.7668	24.5989	80.1346	1.76282	37.7011	6.58041	-0.296628	0.293949	48.3214	0.592056	2023-10-28 00:59:45
911	Session 5	ETH-3	-4.221	25.26	5.95712	12.0421	17.7106	24.4359	116.964	1.78657	37.6665	6.5469	-0.340541	0.201714	84.113	0.545391	2023-10-27 18:25:10
910	Session 5	ETH-3	-4.221	25.26	5.93737	12.0654	17.7448	24.3096	65.7053	1.76471	37.6903	6.56995	-0.309358	0.032445	34.3369	0.57883	2023-10-27 14:34:02
1766	Session 2	ETH-3	-4.221	25.26	5.82083	11.8924	17.524	20.9995	6.24341	1.71586	37.5581	6.44169	-0.238733	-2.85825	-22.926	0.612675	2021-09-22 11:49:49
652	Session 5	ETH-3	-4.221	25.26	5.97389	12.2223	17.967	24.8434	76.4026	1.79782	37.85	6.72486	-0.28097	0.243362	44.3607	0.609415	2023-10-27 00:43:14
1763	Session 2	ETH-3	-4.221	25.26	5.79188	11.867	17.4536	21.2072	8.43437	1.68597	37.5322	6.41659	-0.253472	-2.6054	-20.7202	0.597314	2021-09-22 15:08:12
647	Session 5	ETH-3	-4.221	25.26	5.95503	11.9924	17.7848	24.408	100.522	1.78617	37.6159	6.49781	-0.217265	0.272751	68.2603	0.677676	2023-10-26 18:05:45
648	Session 5	ETH-3	-4.221	25.26	5.9812	12.1483	17.9549	24.5679	93.5165	1.8083	37.7746	6.6517	-0.228416	0.120857	61.1094	0.665876	2023-10-26 14:18:55
987	Session 5	ETH-3	-4.221	25.26	5.81275	12.0494	17.599	24.4783	383.006	1.63276	37.6742	6.55436	-0.309185	0.2289	342.517	0.581341	2023-10-24 04:21:07
1690	Session 2	ETH-3	-4.221	25.26	5.81465	11.8913	17.4852	21.2508	8.06727	1.70932	37.557	6.44067	-0.269439	-2.61074	-21.1466	0.582332	2021-09-25 20:33:56
1691	Session 2	ETH-3	-4.221	25.26	5.79733	11.8162	17.4285	21.1844	5.11378	1.69363	37.4803	6.36627	-0.234441	-2.52761	-23.8542	0.619429	2021-09-25 17:17:47
1764	Session 2	ETH-3	-4.221	25.26	5.80337	11.8287	17.443	21.6538	12.9656	1.6996	37.493	6.37863	-0.2385	-2.09368	-16.2588	0.614835	2021-09-24 14:04:59
983	Session 5	ETH-3	-4.221	25.26	5.95614	12.0834	17.7623	24.4184	10.0933	1.78402	37.7085	6.58766	-0.328914	0.103105	-19.692	0.559998	2023-10-24 14:30:24
982	Session 5	ETH-3	-4.221	25.26	5.94893	12.0055	17.7571	24.1415	-117.779	1.77921	37.6292	6.51067	-0.250866	-0.013166	-143.657	0.643078	2023-10-24 18:05:39
902	Session 5	ETH-3	-4.221	25.26	5.9823	12.046	17.7076	25.1431	39.7734	1.81322	37.6703	6.55061	-0.373023	0.88468	9.15837	0.50955	2023-10-29 04:03:40
985	Session 5	ETH-3	-4.221	25.26	5.99131	12.2174	17.9423	24.8792	128.838	1.81652	37.845	6.71999	-0.318316	0.288009	95.2251	0.570911	2023-10-25 00:35:43
1801	Session 2	ETH-3	-4.221	25.26	5.89392	12.0042	17.7115	21.1524	10.9014	1.78956	37.6722	6.5524	-0.238126	-2.92935	-18.6922	0.614699	2021-09-24 03:46:48
655	Session 5	ETH-3	-4.221	25.26	5.92458	12.0838	17.8071	25.2608	88.2133	1.75044	37.709	6.58809	-0.252867	0.924845	56.159	0.640432	2023-10-25 13:41:04
656	Session 5	ETH-3	-4.221	25.26	5.98278	11.9862	17.7649	24.6067	72.3644	1.81591	37.6095	6.4916	-0.25926	0.479033	40.9099	0.633488	2023-10-25 17:24:27
1802	Session 2	ETH-3	-4.221	25.26	5.84447	11.9592	17.648	21.3276	6.35938	1.73858	37.6262	6.50783	-0.205947	-2.66941	-22.9646	0.648642	2021-09-24 00:28:25
1771	Session 2	ETH-3	-4.221	25.26	5.84143	11.8878	17.5168	21.33	11.4849	1.73795	37.5533	6.43712	-0.262435	-2.5265	-17.8491	0.588341	2021-09-23 15:46:53
1770	Session 2	ETH-3	-4.221	25.26	5.84354	11.9427	17.5826	21.1302	1.46661	1.73819	37.6095	6.49155	-0.253355	-2.82984	-27.6828	0.597767	2021-09-23 12:30:44
1765	Session 2	ETH-3	-4.221	25.26	5.86744	11.9429	17.6351	21.247	8.21755	1.76362	37.6096	6.49166	-0.226444	-2.71617	-21.1534	0.627477	2021-09-24 10:45:54
1686	Session 2	ETH-3	-4.221	25.26	5.81503	11.8925	17.5418	21.0552	4.30722	1.70968	37.5582	6.44183	-0.215366	-2.80412	-24.8003	0.640387	2021-09-26 03:40:12
1584	Session 2	ETH-3	-4.221	25.26	5.78497	11.7904	17.3799	21.5015	12.6411	1.68142	37.454	6.34074	-0.244469	-2.16699	-16.4817	0.605663	2021-09-18 04:30:57
1587	Session 2	ETH-3	-4.221	25.26	5.86674	12.0441	17.7154	21.4589	7.64008	1.75917	37.713	6.59195	-0.245056	-2.70866	-21.9056	0.60499	2021-09-17 23:19:28
745	Session 5	ETH-3	-4.221	25.26	5.93945	12.0857	17.7681	24.2253	39.5196	1.76619	37.7109	6.58993	-0.30824	-0.089855	8.87999	0.574942	2023-11-08 15:20:47
1401	Session 1	ETH-3	-4.221	25.26	5.14076	10.2195	15.1462	21.9042	10.052	1.61237	37.2935	6.18506	-0.25373	1.33346	-15.3241	0.595406	2021-09-12 13:31:41
744	Session 5	ETH-3	-4.221	25.26	5.75118	11.5469	17.0716	23.0994	33.7795	1.58566	37.1626	6.05808	-0.276218	-0.124678	4.55994	0.609768	2023-11-08 05:44:36
740	Session 5	ETH-3	-4.221	25.26	5.76459	11.6107	17.1232	23.3063	17.5341	1.59759	37.2276	6.12113	-0.301206	-0.048703	-11.363	0.583043	2023-11-08 01:04:36
1402	Session 1	ETH-3	-4.221	25.26	5.28151	10.3019	15.3764	21.2141	12.4642	1.75893	37.3773	6.26639	-0.251676	0.493889	-13.2781	0.597673	2021-09-12 16:46:37
741	Session 5	ETH-3	-4.221	25.26	5.72878	11.5899	17.0794	23.1692	13.5596	1.56026	37.2065	6.10068	-0.287444	-0.141696	-15.1475	0.598079	2023-11-07 12:56:54
1400	Session 1	ETH-3	-4.221	25.26	5.1833	10.3301	15.3443	20.8351	5.17647	1.65353	37.4063	6.29448	-0.209968	0.066876	-20.3322	0.643658	2021-09-13 00:03:14
747	Session 5	ETH-3	-4.221	25.26	5.74472	11.685	17.218	23.5497	49.4918	1.57373	37.3033	6.19453	-0.259865	0.042293	19.5615	0.627735	2023-11-07 06:48:48
1399	Session 1	ETH-3	-4.221	25.26	5.19764	10.3984	15.3964	20.6077	9.22411	1.66627	37.4759	6.36201	-0.239736	-0.290968	-16.5328	0.610967	2021-09-13 03:24:24
750	Session 5	ETH-3	-4.221	25.26	5.7703	11.6965	17.3155	23.6172	48.1521	1.60052	37.3149	6.20583	-0.201474	0.085509	18.2097	0.690522	2023-11-06 19:13:53
1394	Session 1	ETH-3	-4.221	25.26	5.22142	10.2822	15.2453	20.564	15.9791	1.6958	37.3574	6.24702	-0.299977	-0.103988	-9.75161	0.544485	2021-09-13 17:41:20
749	Session 5	ETH-3	-4.221	25.26	5.9311	12.0804	17.7753	24.3963	83.7386	1.7575	37.7055	6.58474	-0.287515	0.087534	51.8157	0.598276	2023-11-06 14:48:36
1396	Session 1	ETH-3	-4.221	25.26	5.20727	10.3375	15.3856	20.6222	9.41795	1.67874	37.4138	6.30175	-0.201022	-0.156425	-16.2375	0.654284	2021-09-14 00:34:26
860	Session 5	ETH-3	-4.221	25.26	5.80337	11.7815	17.3454	23.5899	20.6944	1.63258	37.4015	6.28979	-0.288603	-0.109347	-8.66217	0.597404	2023-11-05 19:44:25
1397	Session 1	ETH-3	-4.221	25.26	5.22661	10.3799	15.3738	21.203	9.95689	1.69774	37.457	6.34368	-0.273754	0.328668	-15.8136	0.573511	2021-09-14 03:46:35
826	Session 5	ETH-3	-4.221	25.26	5.76202	11.7732	17.3179	23.5625	22.4624	1.5889	37.3931	6.2817	-0.265138	-0.119681	-6.88555	0.622688	2023-11-05 15:11:51
825	Session 5	ETH-3	-4.221	25.26	5.77598	11.7417	17.2927	23.5379	24.9904	1.60491	37.361	6.25051	-0.273588	-0.081422	-4.38382	0.613832	2023-11-05 07:00:24
689	Session 5	ETH-3	-4.221	25.26	5.78064	11.7182	17.274	23.6624	181.701	1.61073	37.337	6.22728	-0.273939	0.086659	147.882	0.615192	2023-11-01 04:25:36
1588	Session 2	ETH-3	-4.221	25.26	5.81494	11.9565	17.5808	21.4612	8.04981	1.70724	37.6236	6.50528	-0.239115	-2.53386	-21.2878	0.611077	2021-09-17 21:40:43
1589	Session 2	ETH-3	-4.221	25.26	5.58367	11.3797	16.791	20.4691	6.62254	1.48218	37.0347	5.93407	-0.217805	-2.36565	-21.338	0.633006	2021-09-17 16:40:46
696	Session 5	ETH-3	-4.221	25.26	5.76336	11.6468	17.1696	23.3568	63.5136	1.59496	37.2644	6.15681	-0.289466	-0.070853	33.2396	0.59825	2023-11-01 21:28:54
692	Session 5	ETH-3	-4.221	25.26	5.77455	11.6729	17.197	23.4429	34.6957	1.6059	37.2909	6.18255	-0.29936	-0.038277	5.17922	0.587526	2023-11-02 01:52:01
1362	Session 1	ETH-3	-4.221	25.26	5.31232	10.6167	15.7341	22.0234	5.39043	1.78017	37.6985	6.5779	-0.237331	0.663173	-20.8036	0.614788	2021-09-15 17:27:09
688	Session 5	ETH-3	-4.221	25.26	5.90538	11.9437	17.5878	23.8631	-242.766	1.73515	37.5663	6.44973	-0.312563	-0.162907	-264.856	0.574084	2023-10-30 18:15:38
691	Session 5	ETH-3	-4.221	25.26	5.7801	11.6711	17.2332	23.318	32.3487	1.61188	37.2891	6.18077	-0.267729	-0.156738	2.89671	0.621176	2023-11-02 09:48:26
1364	Session 1	ETH-3	-4.221	25.26	4.97337	9.759	14.5386	19.9611	5.57134	1.45131	36.824	5.7296	-0.232416	0.341239	-18.6394	0.620817	2021-09-15 07:34:57
1365	Session 1	ETH-3	-4.221	25.26	5.04866	9.96164	14.7956	20.1516	5.27653	1.52392	37.0306	5.93003	-0.25367	0.126612	-19.3922	0.596541	2021-09-15 03:55:29
828	Session 5	ETH-3	-4.221	25.26	5.78723	11.702	17.2314	23.4431	50.6668	1.61833	37.3205	6.21122	-0.30675	-0.095451	20.6234	0.578817	2023-11-04 09:44:01
1368	Session 1	ETH-3	-4.221	25.26	5.24721	10.4321	15.5468	21.9661	10.0262	1.71772	37.5103	6.39535	-0.17541	0.972634	-15.8676	0.683476	2021-09-14 17:00:31
823	Session 5	ETH-3	-4.221	25.26	5.76058	11.6296	17.1987	23.3117	92.3125	1.59262	37.2469	6.13985	-0.241311	-0.080943	61.2572	0.64878	2023-11-04 14:20:11
822	Session 5	ETH-3	-4.221	25.26	5.77085	11.6617	17.1718	23.4574	52.9238	1.60238	37.2795	6.17152	-0.30943	-0.001934	22.9135	0.575566	2023-11-05 02:28:27
718	Session 5	ETH-3	-4.221	25.26	5.80162	11.7642	17.3217	23.4496	31.9074	1.63136	37.3838	6.27264	-0.293198	-0.212099	2.26395	0.593764	2023-11-02 14:20:17
1369	Session 1	ETH-3	-4.221	25.26	5.19901	10.3151	15.2729	21.8706	7.94866	1.67078	37.391	6.27964	-0.281869	1.11086	-17.6182	0.564506	2021-09-14 20:14:59
1208	Session 5	ETH-3	-4.221	25.26	5.94667	12.0749	17.8276	24.922	92.8199	1.77427	37.6999	6.57927	-0.246797	0.611572	60.6233	0.650412	2023-10-18 06:39:05
1320	Session 2	ETH-3	-4.221	25.26	5.79167	11.7783	17.4057	21.4931	9.65487	1.689	37.4415	6.32866	-0.214181	-2.15119	-19.3658	0.647364	2021-09-30 19:56:50
448	Session 3	ETH-3	-4.221	25.26	5.91982	12.0008	17.7292	24.0686	6.83451	1.70911	37.5138	6.39874	-0.243908	-0.075186	-22.6604	0.63437	2022-06-19 08:40:34
1732	Session 2	ETH-3	-4.221	25.26	5.79286	11.8331	17.4256	23.5944	22.7679	1.68826	37.4975	6.38297	-0.24913	-0.206779	-6.73665	0.616198	2021-10-14 16:58:57
446	Session 3	ETH-3	-4.221	25.26	5.99101	12.1809	17.9497	24.2004	9.62718	1.77842	37.6978	6.57726	-0.275183	-0.302188	-20.3659	0.60092	2022-06-19 07:04:09
68	Session 3	ETH-3	-4.221	25.26	5.93404	12.0428	17.793	24.5194	5.07902	1.72273	37.5567	6.44035	-0.236617	0.282025	-24.4586	0.649324	2022-07-03 09:40:47
43	Session 4	ETH-3	-4.221	25.26	5.82941	11.6629	17.2987	23.2122	7.27009	1.65358	37.27	6.1623	-0.245927	-0.24394	-21.502	0.639103	2022-07-21 11:03:00
67	Session 3	ETH-3	-4.221	25.26	5.93446	12.0405	17.8198	24.135	4.22696	1.72327	37.5543	6.43806	-0.208448	-0.088728	-25.2817	0.680577	2022-07-03 12:57:40
42	Session 4	ETH-3	-4.221	25.26	5.84381	11.8185	17.3929	26.7009	-2.16011	1.66323	37.4293	6.31677	-0.319297	2.85646	-30.9704	0.560871	2022-07-20 19:33:05
485	Session 3	ETH-3	-4.221	25.26	5.84123	12.0119	17.5948	24.0068	11.565	1.6249	37.5253	6.40992	-0.30621	-0.157452	-18.0078	0.567735	2022-06-19 02:11:11
484	Session 3	ETH-3	-4.221	25.26	5.95761	12.0796	17.7869	24.2088	9.63277	1.74652	37.5943	6.47687	-0.302565	-0.094019	-20.1333	0.57154	2022-06-19 00:32:34
70	Session 3	ETH-3	-4.221	25.26	5.92621	11.9938	17.7248	23.8287	1.4266	1.71618	37.5066	6.39179	-0.248024	-0.295599	-27.9032	0.637293	2022-07-03 19:47:59
415	Session 4	ETH-3	-4.221	25.26	5.91723	11.9576	17.713	24.5439	9.31513	1.73643	37.5716	6.45481	-0.215237	0.474308	-20.1675	0.672116	2022-07-20 09:42:47
450	Session 3	ETH-3	-4.221	25.26	5.89817	11.8838	17.6	23.7155	4.54989	1.69032	37.394	6.2826	-0.234974	-0.188683	-24.634	0.643278	2022-06-18 20:00:16
449	Session 3	ETH-3	-4.221	25.26	5.91522	11.7674	17.5413	24.1402	8.17446	1.71277	37.275	6.16711	-0.197065	0.456091	-20.9112	0.683544	2022-06-18 12:54:19
414	Session 4	ETH-3	-4.221	25.26	5.92665	12.0059	17.6433	23.8785	5.85246	1.7447	37.621	6.50278	-0.340311	-0.270899	-23.6304	0.539122	2022-07-20 06:35:26
186	Session 3	ETH-3	-4.221	25.26	5.93795	12.0357	17.8039	23.8558	-1.07991	1.72716	37.5494	6.4333	-0.22297	-0.351877	-30.4272	0.665288	2022-07-04 14:27:16
445	Session 3	ETH-3	-4.221	25.26	5.89781	11.9206	17.6193	24.7506	6.06485	1.68858	37.4317	6.31916	-0.251437	0.749347	-23.2325	0.625544	2022-06-18 09:33:40
1728	Session 2	ETH-3	-4.221	25.26	5.77241	11.8313	17.364	23.5424	23.1642	1.66656	37.4958	6.38128	-0.28697	-0.254145	-6.32688	0.573758	2021-10-15 05:56:45
185	Session 3	ETH-3	-4.221	25.26	5.98667	12.1985	18.0081	24.4059	3.05219	1.77314	37.7159	6.59482	-0.230531	-0.136586	-26.7745	0.657168	2022-07-04 17:43:14
447	Session 3	ETH-3	-4.221	25.26	5.83298	11.8429	17.4575	25.9399	10.5071	1.6223	37.3524	6.24221	-0.268425	2.06468	-18.7042	0.607428	2022-06-18 07:57:04
410	Session 4	ETH-3	-4.221	25.26	5.92786	11.9922	17.6405	24.0214	8.62246	1.7465	37.607	6.48919	-0.330985	-0.104318	-20.9168	0.549471	2022-07-19 23:34:44
181	Session 3	ETH-3	-4.221	25.26	5.92349	12.0532	17.7294	24.1154	4.76466	1.7111	37.5674	6.45071	-0.298369	-0.132997	-24.7725	0.582339	2022-07-04 23:29:14
451	Session 3	ETH-3	-4.221	25.26	5.86452	11.9195	17.5202	23.8535	12.6501	1.65313	37.4307	6.31819	-0.313633	-0.124639	-16.8024	0.559264	2022-06-18 03:48:47
452	Session 3	ETH-3	-4.221	25.26	5.8592	11.9655	17.5661	24.4055	9.25716	1.64576	37.4778	6.36383	-0.307712	0.323546	-20.1786	0.565479	2022-06-18 02:12:39
179	Session 3	ETH-3	-4.221	25.26	5.96563	12.1358	17.8299	24.4368	4.94251	1.75301	37.6518	6.53259	-0.323076	0.017574	-24.7999	0.555097	2022-07-05 02:58:18
411	Session 4	ETH-3	-4.221	25.26	5.98231	12.0549	17.805	24.1327	3.07236	1.80227	37.6711	6.55133	-0.286082	-0.119528	-26.4791	0.597322	2022-07-19 20:30:19
41	Session 4	ETH-3	-4.221	25.26	5.84925	11.8195	17.4867	23.6866	-0.330216	1.66899	37.4303	6.31781	-0.233719	-0.089963	-29.2009	0.651899	2022-07-21 17:49:12
455	Session 3	ETH-3	-4.221	25.26	5.90812	11.9639	17.6114	23.9039	12.348	1.69799	37.4761	6.36216	-0.311882	-0.163111	-17.2259	0.560932	2022-06-17 22:56:39
454	Session 3	ETH-3	-4.221	25.26	5.95685	12.0814	17.9172	24.1366	4.05582	1.74564	37.5962	6.47868	-0.175532	-0.168086	-25.5485	0.707539	2022-06-19 12:54:31
577	Session 3	ETH-3	-4.221	25.26	5.97206	12.1017	17.8574	24.0929	8.30268	1.76112	37.6169	6.49876	-0.269602	-0.250881	-21.4811	0.607242	2022-06-20 21:11:26
609	Session 3	ETH-3	-4.221	25.26	5.99714	12.2686	18.0662	25.7098	11.4868	1.78174	37.7876	6.66438	-0.252354	0.997395	-18.7352	0.626425	2022-06-21 12:31:48
1463	Session 2	ETH-3	-4.221	25.26	5.78337	11.7671	17.3221	21.337	0.027213	1.68058	37.4301	6.3176	-0.27696	-2.2816	-28.6871	0.583061	2021-10-11 15:45:51
3	Session 4	ETH-3	-4.221	25.26	5.88342	11.8419	17.4984	23.7428	1.18136	1.70461	37.4531	6.3399	-0.278927	-0.079164	-27.8104	0.601756	2022-07-24 00:39:47
108	Session 3	ETH-3	-4.221	25.26	5.92699	11.9764	17.6941	23.5798	-0.4097	1.71766	37.4888	6.37453	-0.262133	-0.504298	-29.6538	0.619743	2022-06-30 13:55:28
8	Session 4	ETH-3	-4.221	25.26	5.83477	11.7349	17.3702	23.3721	-1.54131	1.65665	37.3437	6.23378	-0.251122	-0.229894	-30.2028	0.632018	2022-07-23 21:28:58
1461	Session 2	ETH-3	-4.221	25.26	5.77628	11.7661	17.373	20.8671	10.4307	1.67306	37.4292	6.31666	-0.218734	-2.73876	-18.5731	0.648683	2021-10-11 22:38:06
9	Session 4	ETH-3	-4.221	25.26	5.97148	12.1075	17.8818	24.5343	0.327875	1.78879	37.7249	6.60353	-0.250633	0.16871	-29.2306	0.632666	2022-07-23 14:49:26
10	Session 4	ETH-3	-4.221	25.26	5.71849	11.3686	16.8668	22.8936	11.1895	1.54608	36.9689	5.87021	-0.27077	0.026599	-17.0172	0.611147	2022-07-23 11:05:41
574	Session 3	ETH-3	-4.221	25.26	5.99354	12.218	18.0229	24.6084	9.53716	1.77975	37.7358	6.61415	-0.242038	0.022501	-20.5266	0.637345	2022-06-21 09:20:37
1460	Session 2	ETH-3	-4.221	25.26	5.80322	11.7729	17.3891	21.4502	10.3595	1.70149	37.4361	6.32335	-0.237204	-2.18257	-18.6833	0.628172	2021-10-12 01:54:02
573	Session 3	ETH-3	-4.221	25.26	5.98012	12.2367	17.9754	25.5827	7.97473	1.76476	37.755	6.63275	-0.293007	0.9365	-22.0641	0.582698	2022-06-21 07:44:22
132	Session 3	ETH-3	-4.221	25.26	5.92728	11.947	17.692	23.6287	1.93146	1.71904	37.4587	6.34532	-0.235824	-0.398423	-27.3258	0.648803	2022-07-01 17:48:57
38	Session 4	ETH-3	-4.221	25.26	5.85446	11.7914	17.5567	23.7079	2.87533	1.67558	37.4015	6.28986	-0.142954	-0.013532	-26.0401	0.749058	2022-07-22 15:37:48
1456	Session 2	ETH-3	-4.221	25.26	5.80231	11.8582	17.4634	21.2043	5.55891	1.6974	37.5231	6.40781	-0.245998	-2.59079	-23.5066	0.618626	2021-10-12 10:30:14
1455	Session 2	ETH-3	-4.221	25.26	5.80223	11.8491	17.4769	21.5848	8.82575	1.69765	37.5138	6.39879	-0.223826	-2.20117	-20.3168	0.643871	2021-10-12 13:38:15
35	Session 4	ETH-3	-4.221	25.26	5.90388	11.9582	17.6764	24.0587	9.94116	1.72217	37.5723	6.45547	-0.238085	-0.000702	-19.5471	0.646698	2022-07-22 08:54:06
568	Session 3	ETH-3	-4.221	25.26	5.99821	12.1928	18.0059	24.2914	12.5176	1.78565	37.7101	6.58915	-0.23904	-0.237062	-17.5917	0.640268	2022-06-21 03:37:33
36	Session 4	ETH-3	-4.221	25.26	5.86105	11.6362	17.2423	23.1582	12.4666	1.6883	37.2426	6.1357	-0.307857	-0.243915	-16.4358	0.571898	2022-07-22 05:34:57
76	Session 3	ETH-3	-4.221	25.26	5.90536	11.964	17.6131	24.2587	-2.09331	1.69505	37.4761	6.36218	-0.307342	0.18328	-31.2425	0.570691	2022-07-02 13:18:05
571	Session 3	ETH-3	-4.221	25.26	5.97777	12.1581	17.9306	24.3035	11.1093	1.76514	37.6746	6.55475	-0.258277	-0.156734	-18.8708	0.619598	2022-06-21 02:00:14
77	Session 3	ETH-3	-4.221	25.26	5.90113	12.0106	17.7301	24.1182	3.07501	1.68882	37.5239	6.40852	-0.233455	-0.046207	-26.309	0.651863	2022-07-02 16:27:27
40	Session 4	ETH-3	-4.221	25.26	5.83552	11.8161	17.3554	26.0802	9.41293	1.65448	37.4269	6.31446	-0.345375	2.25481	-19.7184	0.532044	2022-07-21 21:02:41
576	Session 3	ETH-3	-4.221	25.26	6.01258	12.2218	18.0458	24.35	9.37284	1.79992	37.7397	6.61788	-0.242696	-0.237176	-20.713	0.636069	2022-06-20 22:47:42
73	Session 3	ETH-3	-4.221	25.26	5.93612	12.0032	17.7119	24.176	4.17811	1.7264	37.5162	6.40105	-0.27989	0.025009	-25.2603	0.601181	2022-07-02 22:03:22
1731	Session 2	ETH-3	-4.221	25.26	5.78573	11.812	17.3864	21.7272	3.82166	1.68144	37.476	6.36207	-0.259817	-1.98892	-25.089	0.603876	2021-10-14 12:51:23
72	Session 3	ETH-3	-4.221	25.26	5.93486	12.0177	17.6764	24.6383	0.503097	1.72453	37.5311	6.4155	-0.32768	0.447631	-28.8537	0.548783	2022-07-03 01:14:25
453	Session 3	ETH-3	-4.221	25.26	5.93817	12.1049	17.7911	24.2046	9.19421	1.72487	37.6202	6.50198	-0.303007	-0.148099	-20.5868	0.570254	2022-06-17 21:20:19
183	Session 3	ETH-3	-4.221	25.26	5.98838	12.1909	18.0165	24.9139	1.467	1.77525	37.7081	6.58726	-0.216714	0.374285	-28.3	0.673547	2022-07-05 15:06:03
251	Session 3	ETH-3	-4.221	25.26	5.93932	12.0553	17.7386	24.3355	11.4705	1.72791	37.5695	6.45278	-0.307611	0.077658	-18.2844	0.565196	2022-06-16 23:37:21
375	Session 3	ETH-3	-4.221	25.26	5.89421	11.9376	17.5487	23.8256	16.082	1.68412	37.4492	6.3361	-0.333652	-0.187641	-13.536	0.535869	2022-06-10 22:53:24
614	Session 4	ETH-3	-4.221	25.26	5.88759	11.9123	17.5086	23.6576	2.32279	1.70647	37.5253	6.4099	-0.341628	-0.301694	-26.8395	0.541674	2022-07-16 00:35:03
374	Session 3	ETH-3	-4.221	25.26	5.91959	12.0511	17.6839	23.8638	9.07134	1.70703	37.5652	6.44863	-0.336987	-0.374515	-20.5844	0.532279	2022-06-10 19:44:31
1618	Session 2	ETH-3	-4.221	25.26	5.7456	11.7966	17.3548	21.0738	0.066168	1.63928	37.4604	6.34697	-0.234764	-2.59701	-28.6662	0.63476	2021-10-18 22:26:20
531	Session 3	ETH-3	-4.221	25.26	5.90525	12.0024	17.6465	23.8529	6.16867	1.69352	37.5154	6.40031	-0.31171	-0.288909	-23.2946	0.569665	2022-07-09 02:25:04
1284	Session 2	ETH-3	-4.221	25.26	5.74439	11.6951	17.2626	22.548	7.5783	1.64171	37.3566	6.24628	-0.225485	-0.95633	-21.1755	0.650115	2021-10-22 02:19:03
567	Session 3	ETH-3	-4.221	25.26	5.91437	12.0107	17.7346	23.9463	5.85837	1.70294	37.5239	6.40857	-0.242598	-0.214126	-23.621	0.647528	2022-07-09 05:35:46
613	Session 4	ETH-3	-4.221	25.26	5.82999	11.9638	17.6229	23.8803	6.84565	1.64315	37.5782	6.4612	-0.220365	-0.185983	-22.4864	0.668537	2022-07-15 17:29:33
1283	Session 2	ETH-3	-4.221	25.26	5.72507	11.716	17.234	21.8638	3.90753	1.62039	37.378	6.26704	-0.254078	-1.66602	-24.7611	0.616519	2021-10-21 23:04:37
494	Session 3	ETH-3	-4.221	25.26	5.85349	11.9183	17.4542	26.039	3.22957	1.64141	37.4295	6.317	-0.365993	2.01217	-25.9352	0.508787	2022-07-11 19:59:06
610	Session 4	ETH-3	-4.221	25.26	5.85507	11.7364	17.3265	23.2729	13.2866	1.67824	37.3452	6.23524	-0.31635	-0.329891	-15.8245	0.568654	2022-07-15 14:19:54
1280	Session 2	ETH-3	-4.221	25.26	5.79446	11.792	17.3888	34.9073	10.0367	1.69147	37.4556	6.34227	-0.24698	10.9251	-19.0241	0.624197	2021-10-21 12:40:07
489	Session 3	ETH-3	-4.221	25.26	5.90728	12.0247	17.7166	24.2197	9.35896	1.69486	37.5382	6.42246	-0.266673	0.025177	-20.2423	0.622342	2022-07-13 07:19:02
495	Session 3	ETH-3	-4.221	25.26	5.88108	11.9336	17.5363	24.2948	8.83808	1.67027	37.4451	6.33214	-0.328436	0.278503	-20.5475	0.551199	2022-07-11 23:14:20
1612	Session 2	ETH-3	-4.221	25.26	5.78327	11.7848	17.3501	21.348	8.05079	1.67982	37.4482	6.33514	-0.266526	-2.30572	-20.9275	0.599285	2021-10-19 15:38:48
488	Session 3	ETH-3	-4.221	25.26	5.90259	11.9164	17.541	23.7411	9.41182	1.69383	37.4275	6.31504	-0.329214	-0.22826	-19.9801	0.551159	2022-07-13 04:05:05
491	Session 3	ETH-3	-4.221	25.26	5.90914	11.9617	17.6631	23.8219	6.40821	1.69916	37.4737	6.35989	-0.259853	-0.238745	-22.9888	0.628772	2022-07-12 06:16:59
1285	Session 2	ETH-3	-4.221	25.26	5.78396	11.7564	17.3061	22.1417	7.12721	1.68159	37.4192	6.30696	-0.282888	-1.47436	-21.7712	0.581872	2021-10-21 00:23:00
1613	Session 2	ETH-3	-4.221	25.26	5.81899	11.8273	17.4431	21.6852	5.71164	1.71628	37.4916	6.37721	-0.253115	-2.0603	-23.317	0.614919	2021-10-19 18:49:53
1644	Session 2	ETH-3	-4.221	25.26	5.78668	11.7632	17.3351	20.8956	7.10715	1.68424	37.4262	6.31378	-0.26388	-2.70526	-21.8066	0.602826	2021-10-20 01:50:27
486	Session 3	ETH-3	-4.221	25.26	5.90674	11.974	17.6919	24.6646	7.19962	1.69615	37.4863	6.3721	-0.241079	0.559825	-22.2414	0.650813	2022-07-12 21:12:05
1643	Session 2	ETH-3	-4.221	25.26	5.81741	11.8648	17.4579	23.6204	9.46918	1.71323	37.5299	6.4144	-0.273376	-0.244196	-19.7377	0.592074	2021-10-20 04:57:06
487	Session 3	ETH-3	-4.221	25.26	5.93072	11.9998	17.7554	24.3311	6.75228	1.72077	37.5127	6.39773	-0.228426	0.183023	-22.7496	0.664933	2022-07-12 18:00:10
1288	Session 2	ETH-3	-4.221	25.26	5.6984	11.5585	17.0484	20.9415	4.82124	1.59776	37.2171	6.111	-0.256103	-2.25655	-23.5472	0.61242	2021-10-20 14:54:09
1290	Session 2	ETH-3	-4.221	25.26	5.74511	11.6978	17.254	21.2598	2.7561	1.64238	37.3594	6.24899	-0.237368	-2.22037	-25.866	0.634227	2021-10-20 18:10:34
530	Session 3	ETH-3	-4.221	25.26	5.9296	11.9647	17.6903	24.0866	8.1614	1.72087	37.4768	6.36291	-0.257158	0.01371	-21.3139	0.630658	2022-07-08 19:39:34
645	Session 4	ETH-3	-4.221	25.26	5.91369	12.0059	17.7121	24.0209	5.04945	1.73088	37.621	6.50273	-0.25934	-0.131761	-24.3963	0.62748	2022-07-16 03:47:15
372	Session 3	ETH-3	-4.221	25.26	5.91687	11.9837	17.7241	24.0162	11.0634	1.70659	37.4963	6.3818	-0.229328	-0.092669	-18.5197	0.644796	2022-06-11 04:31:38
528	Session 3	ETH-3	-4.221	25.26	5.93838	12.0627	17.8115	24.8606	6.1044	1.72663	37.5771	6.46015	-0.242221	0.575717	-23.5057	0.647238	2022-07-08 16:20:56
416	Session 4	ETH-3	-4.221	25.26	5.90309	12.0471	17.8311	30.8285	3.49899	1.71807	37.6633	6.54376	-0.171707	6.43323	-25.9685	0.718698	2022-07-19 12:18:58
1724	Session 2	ETH-3	-4.221	25.26	5.82779	11.8894	17.5432	30.8906	28.6573	1.72338	37.555	6.43875	-0.224152	6.80755	-1.16352	0.645541	2021-10-15 14:58:30
417	Session 4	ETH-3	-4.221	25.26	5.90925	11.9015	17.6476	23.6398	4.34823	1.72998	37.5141	6.39908	-0.216813	-0.297683	-24.8748	0.671008	2022-07-19 09:03:09
249	Session 3	ETH-3	-4.221	25.26	5.94326	12.0854	17.7823	24.1361	10.2637	1.731	37.6002	6.48258	-0.297863	-0.1763	-19.5169	0.575367	2022-06-16 20:16:32
1725	Session 2	ETH-3	-4.221	25.26	5.8107	11.8807	17.4743	21.1124	10.0159	1.70551	37.5462	6.43016	-0.265862	-2.72498	-19.2301	0.598251	2021-10-15 20:21:10
252	Session 3	ETH-3	-4.221	25.26	5.94916	12.149	17.9222	24.2061	12.8431	1.73496	37.6653	6.54573	-0.228322	-0.233702	-17.1411	0.64854	2022-06-16 13:20:40
180	Session 3	ETH-3	-4.221	25.26	5.92019	12.0291	17.7316	23.9611	7.03358	1.70847	37.5427	6.42682	-0.269448	-0.236029	-22.5212	0.615356	2022-07-06 16:24:02
250	Session 3	ETH-3	-4.221	25.26	5.91269	11.9372	17.6531	23.588	13.8351	1.70384	37.4487	6.33562	-0.249597	-0.418784	-15.7359	0.62594	2022-06-16 10:01:30
421	Session 4	ETH-3	-4.221	25.26	5.93787	12.0137	17.652	23.9378	3.07496	1.75639	37.629	6.51048	-0.350793	-0.228351	-26.3528	0.52984	2022-07-19 02:01:24
420	Session 4	ETH-3	-4.221	25.26	5.87364	11.8393	17.3685	24.0157	4.21849	1.69428	37.4506	6.33742	-0.394088	0.192341	-24.8463	0.48449	2022-07-18 22:47:03
254	Session 3	ETH-3	-4.221	25.26	5.93352	12.1553	17.8548	24.1672	8.32412	1.71806	37.6718	6.55207	-0.284644	-0.284215	-21.5222	0.588709	2022-06-16 01:42:35
255	Session 3	ETH-3	-4.221	25.26	5.95569	12.099	17.8104	24.0601	9.64413	1.74376	37.6141	6.49609	-0.296252	-0.277464	-20.1571	0.576359	2022-06-15 22:29:55
608	Session 3	ETH-3	-4.221	25.26	5.94507	12.1544	17.872	24.7748	11.04	1.7304	37.6709	6.55113	-0.278742	0.310702	-18.897	0.598217	2022-06-21 14:50:08
534	Session 3	ETH-3	-4.221	25.26	6.2203	12.7927	18.8183	25.4622	3.41488	2.00049	38.3233	7.18395	-0.251466	-0.279555	-27.7852	0.635943	2022-07-07 19:47:12
532	Session 3	ETH-3	-4.221	25.26	5.95182	12.0533	17.7413	23.9037	10.0691	1.74131	37.5674	6.45077	-0.315799	-0.339944	-19.6537	0.564099	2022-07-07 22:55:38
612	Session 4	ETH-3	-4.221	25.26	5.89766	11.9552	17.6546	24.3276	7.7162	1.71564	37.5691	6.45244	-0.25018	0.267865	-21.6948	0.636325	2022-07-17 01:59:50
256	Session 3	ETH-3	-4.221	25.26	5.89274	12.0269	17.7469	24.1073	6.37184	1.67928	37.5405	6.42465	-0.224066	-0.088848	-23.1309	0.651755	2022-06-15 13:54:19
369	Session 3	ETH-3	-4.221	25.26	5.92158	11.9781	17.712	24.1184	13.2434	1.71182	37.4905	6.37619	-0.240551	0.018288	-16.3977	0.634232	2022-06-14 18:03:37
408	Session 3	ETH-3	-4.221	25.26	5.93379	12.0292	17.7847	23.8345	9.54259	1.72297	37.5428	6.42686	-0.23125	-0.359857	-20.1001	0.64378	2022-06-14 14:47:36
404	Session 3	ETH-3	-4.221	25.26	5.98077	12.1524	17.8559	24.0855	2.72414	1.76855	37.6688	6.54909	-0.329219	-0.358261	-26.9997	0.540998	2022-06-13 19:37:36
529	Session 3	ETH-3	-4.221	25.26	5.97684	12.1048	17.8312	24.3774	9.36682	1.76611	37.62	6.5018	-0.303149	0.020861	-20.4592	0.578597	2022-07-08 07:51:32
370	Session 3	ETH-3	-4.221	25.26	5.91947	11.9942	17.7196	23.8504	9.48094	1.70898	37.507	6.39218	-0.246547	-0.275224	-20.0785	0.627414	2022-06-11 16:11:53
611	Session 4	ETH-3	-4.221	25.26	5.89093	11.8899	17.6061	24.4852	6.90434	1.71086	37.5023	6.38765	-0.227499	0.550789	-22.3522	0.660406	2022-07-16 15:35:52
371	Session 3	ETH-3	-4.221	25.26	5.90245	11.98	17.6714	24.1641	9.55133	1.69136	37.4925	6.37813	-0.262739	0.059138	-19.9655	0.610126	2022-06-11 07:41:06
1761	Session 2	ETH-3	-4.221	25.26	5.84253	11.8751	17.5119	26.1094	23.0578	1.7396	37.5403	6.42449	-0.256023	2.16647	-6.58844	0.610017	2021-10-16 09:05:54
644	Session 4	ETH-3	-4.221	25.26	5.90234	11.9494	17.658	25.8421	5.88833	1.72085	37.5632	6.44669	-0.24604	1.75828	-23.4633	0.641108	2022-07-16 12:08:08
257	Session 3	ETH-3	-4.221	25.26	5.90859	11.9563	17.7032	23.8865	7.5104	1.69877	37.4682	6.35453	-0.214657	-0.164994	-21.908	0.661843	2022-06-15 17:00:00
2	Session 4	ETH-3	-4.221	25.26	5.89676	11.9519	17.6601	24.102	6.05435	1.7148	37.5658	6.44916	-0.240606	0.054124	-23.301	0.642895	2022-07-24 08:50:09
490	Session 3	ETH-3	-4.221	25.26	5.8319	11.8755	17.4926	24.3075	7.70497	1.61995	37.3858	6.27459	-0.264562	0.405738	-21.4862	0.623608	2022-07-12 09:31:03
221	Session 4	ETH-3	-4.221	25.26	5.89176	11.9202	17.5605	23.7354	2.86005	1.71063	37.5334	6.41773	-0.302585	-0.241323	-26.3371	0.573194	2022-07-27 21:05:48
332	Session 4	ETH-3	-4.221	25.26	5.86228	11.7397	17.3698	23.2267	4.71531	1.68581	37.3486	6.23849	-0.284373	-0.381457	-24.1633	0.592389	2022-07-28 22:02:06
569	Session 3	ETH-3	-4.221	25.26	5.96544	11.9641	17.6735	24.4574	12.6418	1.75911	37.4761	6.36217	-0.309736	0.377063	-17.0006	0.565325	2022-06-22 00:16:19
142	Session 3	ETH-3	-4.221	25.26	5.96015	12.0836	17.9112	24.1797	9.02008	1.74908	37.5983	6.48077	-0.186893	-0.130233	-20.738	0.699805	2022-06-23 14:01:09
178	Session 3	ETH-3	-4.221	25.26	5.94548	12.046	17.8255	23.9927	8.63622	1.73481	37.56	6.44354	-0.219591	-0.238601	-21.024	0.66445	2022-06-23 15:38:33
1247	Session 2	ETH-3	-4.221	25.26	5.82212	11.8825	17.5023	22.1409	10.6597	1.71759	37.548	6.43192	-0.251743	-1.72407	-18.6203	0.609854	2021-10-08 08:10:53
365	Session 4	ETH-3	-4.221	25.26	5.87113	12.0233	17.6401	24.096	-4.27526	1.68485	37.639	6.52018	-0.303407	-0.092918	-33.437	0.569616	2022-07-30 01:29:56
227	Session 4	ETH-3	-4.221	25.26	5.99671	12.107	17.8811	34.3338	12.256	1.81571	37.7244	6.60305	-0.276742	9.73606	-17.6803	0.601786	2022-07-26 18:51:41
572	Session 3	ETH-3	-4.221	25.26	5.95959	12.1276	17.8598	24.3386	7.54179	1.74686	37.6434	6.52451	-0.279577	-0.062206	-22.2558	0.597828	2022-06-22 01:57:37
226	Session 4	ETH-3	-4.221	25.26	5.96321	12.0882	17.9119	24.3205	6.12201	1.78067	37.7052	6.58443	-0.193815	-0.002008	-23.5626	0.693104	2022-07-26 10:15:50
331	Session 4	ETH-3	-4.221	25.26	5.8726	11.8649	17.4687	24.0305	9.92064	1.69223	37.4768	6.36283	-0.319471	0.156207	-19.3568	0.553263	2022-07-29 01:11:37
579	Session 3	ETH-3	-4.221	25.26	5.77992	11.8641	17.4341	24.0139	8.35274	1.56494	37.3742	6.26332	-0.257607	0.141639	-20.7815	0.621777	2022-06-22 07:34:30
143	Session 3	ETH-3	-4.221	25.26	5.93218	11.9999	17.7343	23.8395	11.7321	1.72233	37.5128	6.39781	-0.250723	-0.297126	-17.9174	0.630995	2022-06-24 13:40:28
1252	Session 2	ETH-3	-4.221	25.26	5.84191	11.902	17.5274	22.009	6.0328	1.73795	37.5679	6.45121	-0.266339	-1.89142	-23.1706	0.593134	2021-10-07 22:12:27
1430	Session 2	ETH-3	-4.221	25.26	5.79759	11.765	17.3588	21.3658	13.96	1.69579	37.4279	6.31546	-0.253456	-2.24928	-15.1651	0.606145	2021-10-05 05:38:33
111	Session 3	ETH-3	-4.221	25.26	6.00227	12.1686	17.9296	24.1469	7.52118	1.79088	37.6853	6.56509	-0.294623	-0.3303	-22.3978	0.583586	2022-06-27 19:56:57
220	Session 4	ETH-3	-4.221	25.26	5.91799	11.9731	17.6377	23.7944	1.54064	1.73667	37.5874	6.47018	-0.304982	-0.288126	-27.7449	0.571386	2022-07-26 06:56:18
1425	Session 2	ETH-3	-4.221	25.26	5.89016	12.0746	17.8004	21.3028	-0.59459	1.78298	37.7441	6.62214	-0.215232	-2.92113	-29.9803	0.647467	2021-10-04 15:53:46
336	Session 4	ETH-3	-4.221	25.26	5.8743	11.7836	17.5241	23.5658	15.3246	1.69703	37.3935	6.2821	-0.187835	-0.137048	-13.9557	0.698978	2022-07-29 12:32:34
299	Session 4	ETH-3	-4.221	25.26	5.9003	11.9582	17.6323	24.3696	9.66374	1.71835	37.5723	6.45548	-0.27774	0.302805	-19.8127	0.597845	2022-07-31 22:20:15
145	Session 3	ETH-3	-4.221	25.26	5.93303	12.1479	17.8611	24.9182	-0.751996	1.7178	37.6642	6.54466	-0.270728	0.463596	-30.3151	0.608673	2022-06-23 09:26:13
144	Session 3	ETH-3	-4.221	25.26	5.96262	12.1514	17.93	24.4207	8.09171	1.74923	37.6677	6.54806	-0.236775	-0.028914	-21.7704	0.645357	2022-06-23 07:17:54
338	Session 4	ETH-3	-4.221	25.26	5.87122	11.9029	17.6309	24.1802	7.49688	1.68936	37.5156	6.40054	-0.195487	0.227394	-21.781	0.690959	2022-07-28 12:21:24
149	Session 3	ETH-3	-4.221	25.26	5.93422	11.9763	17.6932	24.0703	8.68291	1.72536	37.4887	6.3744	-0.270244	-0.025113	-20.8345	0.609865	2022-06-24 17:58:05
1429	Session 2	ETH-3	-4.221	25.26	5.79594	11.7928	17.3901	20.847	7.57501	1.69301	37.4564	6.34309	-0.248081	-2.81099	-21.418	0.611859	2021-10-05 02:25:27
578	Session 3	ETH-3	-4.221	25.26	5.95893	12.1166	17.8581	24.9582	8.43141	1.74657	37.6321	6.51353	-0.269823	0.564485	-21.3708	0.608528	2022-06-22 05:57:20
337	Session 4	ETH-3	-4.221	25.26	5.92295	12.0649	17.7619	24.335	-0.23228	1.73859	37.6814	6.56133	-0.277196	0.058301	-29.644	0.600487	2022-07-28 15:27:20
112	Session 3	ETH-3	-4.221	25.26	5.99434	12.1559	17.9373	24.1509	6.08056	1.78289	37.6723	6.55251	-0.266538	-0.30127	-23.7634	0.613987	2022-06-27 16:43:45
1248	Session 2	ETH-3	-4.221	25.26	5.83248	11.8496	17.5027	20.9967	9.25672	1.72982	37.5143	6.39923	-0.230001	-2.77661	-19.9306	0.63383	2021-10-08 04:58:21
297	Session 4	ETH-3	-4.221	25.26	5.89389	11.8519	17.5387	23.476	3.71392	1.71541	37.4634	6.3499	-0.25992	-0.359734	-25.381	0.61756	2022-08-01 14:07:36
1424	Session 2	ETH-3	-4.221	25.26	5.90888	12.0661	17.7536	21.272	5.44414	1.80323	37.7354	6.61372	-0.272236	-2.93456	-24.1225	0.584947	2021-10-04 19:01:09
1251	Session 2	ETH-3	-4.221	25.26	5.811	11.8469	17.4416	22.1324	2.74227	1.70706	37.5116	6.39663	-0.265421	-1.66208	-26.2295	0.59395	2021-10-07 19:01:46
296	Session 4	ETH-3	-4.221	25.26	5.92787	12.0463	17.7252	24.0092	2.93692	1.74452	37.6623	6.54284	-0.300292	-0.223018	-26.538	0.571927	2022-08-01 20:07:39
225	Session 4	ETH-3	-4.221	25.26	5.92656	12.0134	17.6782	23.9935	4.04714	1.74433	37.6287	6.51019	-0.313156	-0.173396	-25.3968	0.561311	2022-07-28 00:16:19
291	Session 4	ETH-3	-4.221	25.26	5.89098	11.9499	17.6735	23.9	3.46663	1.70872	37.5638	6.44723	-0.219681	-0.139221	-25.8035	0.662322	2022-08-02 16:04:48
139	Session 3	ETH-3	-4.221	25.26	5.88992	11.9861	17.5821	24.2206	7.48039	1.67777	37.4987	6.38415	-0.343457	0.102431	-21.9744	0.529735	2022-06-23 03:57:42
570	Session 3	ETH-3	-4.221	25.26	5.94334	12.0422	17.7807	24.1766	8.64282	1.73267	37.5561	6.4398	-0.257663	-0.051642	-21.0082	0.621138	2022-06-21 20:59:57
293	Session 4	ETH-3	-4.221	25.26	5.85742	11.8395	17.4548	23.4451	1.5812	1.67698	37.4507	6.33758	-0.29282	-0.365289	-27.3908	0.579317	2022-08-03 02:03:51
1245	Session 2	ETH-3	-4.221	25.26	5.85352	11.9552	17.6099	21.1166	5.58202	1.74836	37.6221	6.50385	-0.248761	-2.86767	-23.721	0.614193	2021-10-09 02:50:59
136	Session 3	ETH-3	-4.221	25.26	5.94583	12.0248	17.8334	23.819	-1.45557	1.73596	37.5382	6.42248	-0.191562	-0.366303	-30.7794	0.69633	2022-06-29 13:52:39
109	Session 3	ETH-3	-4.221	25.26	6.03394	12.2946	18.0708	24.4438	9.4473	1.82003	37.8141	6.69009	-0.310797	-0.289447	-20.8013	0.566212	2022-06-28 01:32:32
366	Session 4	ETH-3	-4.221	25.26	5.86162	12.0141	17.5762	24.0751	-8.13156	1.67504	37.6295	6.51104	-0.347447	-0.095087	-37.1535	0.520687	2022-07-29 22:18:23
148	Session 3	ETH-3	-4.221	25.26	5.91769	12.0691	17.7886	24.1057	4.28455	1.70434	37.5836	6.46651	-0.249736	-0.173858	-25.2627	0.630437	2022-06-22 15:49:44
1243	Session 2	ETH-3	-4.221	25.26	5.83974	11.9216	17.5743	22.309	7.09223	1.73492	37.5879	6.47063	-0.237091	-1.63706	-22.1769	0.626898	2021-10-08 19:53:14
228	Session 4	ETH-3	-4.221	25.26	5.93095	12.0118	17.625	23.7854	-3.34638	1.74907	37.627	6.50861	-0.368357	-0.373385	-32.575	0.502733	2022-07-25 20:40:55
1244	Session 2	ETH-3	-4.221	25.26	5.79313	11.791	17.3742	23.0398	9.56333	1.69008	37.4545	6.34127	-0.258965	-0.665385	-19.4805	0.602235	2021-10-08 16:41:03
1323	Session 2	ETH-3	-4.221	25.26	5.81965	11.8691	17.5306	21.7025	10.7547	1.71545	37.5343	6.41862	-0.208376	-2.12573	-18.4999	0.653993	2021-09-30 23:25:04
1428	Session 2	ETH-3	-4.221	25.26	5.67598	11.4623	16.9641	20.3362	8.15797	1.57742	37.1189	6.01569	-0.222545	-2.65832	-20.0983	0.64122	2021-10-06 21:51:00
5	Session 4	ETH-3	-4.221	25.26	5.90028	11.9079	17.6626	23.8779	6.37502	1.72017	37.5208	6.40551	-0.19909	-0.077839	-22.91	0.687942	2022-07-24 11:57:07
222	Session 4	ETH-3	-4.221	25.26	5.92851	11.9869	17.5979	23.91	8.6772	1.74739	37.6015	6.48384	-0.368276	-0.202529	-20.8541	0.502558	2022-07-25 23:56:47
141	Session 3	ETH-3	-4.221	25.26	5.94327	12.1205	17.8412	24.458	8.44774	1.72973	37.6362	6.51751	-0.274244	0.068412	-21.3462	0.604538	2022-06-23 02:21:46
575	Session 3	ETH-3	-4.221	25.26	5.94474	12.0958	17.8849	24.2593	9.98116	1.7322	37.6109	6.49295	-0.208772	-0.076691	-19.8126	0.674107	2022-06-22 03:32:43
1246	Session 2	ETH-3	-4.221	25.26	5.82464	11.9394	17.5942	26.3857	11.2025	1.71819	37.6061	6.48833	-0.219373	2.30888	-18.2043	0.647229	2021-10-09 06:07:57
1361	Session 2	ETH-3	-4.221	25.26	5.82719	11.8995	17.582	21.325	9.64353	1.72236	37.5653	6.44876	-0.195196	-2.5545	-19.6446	0.66914	2021-10-01 10:26:59
1324	Session 2	ETH-3	-4.221	25.26	5.78075	11.8048	17.373	21.077	9.37993	1.6764	37.4686	6.35494	-0.260902	-2.60988	-19.672	0.596789	2021-10-01 06:37:08
146	Session 3	ETH-3	-4.221	25.26	5.92013	12.0806	17.7351	24.5939	13.6153	1.70652	37.5954	6.47792	-0.315931	0.280006	-16.2309	0.559302	2022-06-22 22:14:50
1454	Session 2	ETH-3	-4.221	25.26	5.77846	11.8107	17.3859	23.7891	6.99664	1.67375	37.4747	6.36084	-0.251642	0.027605	-21.9956	0.608696	2021-10-05 18:04:44
140	Session 3	ETH-3	-4.221	25.26	6.10039	12.5205	18.3845	24.832	6.1885	1.88261	38.0451	6.91414	-0.290171	-0.356749	-24.459	0.58807	2022-06-24 12:02:11
607	Session 3	ETH-3	-4.221	25.26	5.93872	12.0554	17.8115	24.7969	10.9095	1.72726	37.5696	6.45288	-0.235463	0.528026	-18.8284	0.644889	2022-06-21 19:18:37
335	Session 4	ETH-3	-4.221	25.26	5.96574	12.0167	17.9188	23.9586	0.318189	1.786	37.6319	6.51337	-0.120152	-0.213928	-29.0629	0.774179	2022-07-29 09:29:32
147	Session 3	ETH-3	-4.221	25.26	5.95061	12.1591	17.8774	24.5915	6.28016	1.73614	37.6756	6.55575	-0.283696	0.12249	-23.5305	0.594047	2022-06-22 20:43:07
294	Session 4	ETH-3	-4.221	25.26	5.92025	11.9989	17.668	23.879	-1.16635	1.73813	37.6139	6.49581	-0.302604	-0.256587	-30.4237	0.56785	2022-08-03 05:14:03
376	Session 3	ETH-4	-4.221	25.26	-5.92999	-5.58776	-11.9784	-11.0572	-20.87	-10.2792	19.5449	-11.0312	-0.405574	0.088007	-3.73419	0.465493	2022-06-14 11:35:47
436	Session 4	ETH-4	-4.221	25.26	-5.90696	-5.46432	-11.9589	-10.6466	-25.7266	-10.2324	19.7591	-10.8234	-0.531634	0.254907	-8.94205	0.33514	2022-07-19 04:19:11
884	Session 5	ETH-4	-4.221	25.26	-5.99053	-5.67717	-12.1551	-11.2733	-79.4114	-10.2699	19.6484	-10.9308	-0.433129	0.049286	-63.0738	0.452129	2023-11-29 10:03:43
710	Session 5	ETH-4	-4.221	25.26	-6.02835	-5.74304	-12.2354	-11.3217	-39.2286	-10.3077	19.5814	-10.9958	-0.410024	0.13287	-22.011	0.475786	2023-11-01 13:54:29
1605	Session 2	ETH-4	-4.221	25.26	-5.95324	-5.52264	-11.9508	-9.57742	-19.3443	-10.177	19.7903	-10.7932	-0.41783	1.45332	-2.28529	0.415566	2021-09-18 06:59:53
1498	Session 1	ETH-4	-4.221	25.26	-6.55426	-6.929	-13.9069	-13.6305	-14.9397	-10.187	19.8198	-10.7646	-0.384254	0.181917	5.63468	0.443346	2021-09-02 03:13:00
1230	Session 5	ETH-4	-4.221	25.26	-5.90062	-5.57599	-11.9176	-10.9784	-132.736	-10.178	19.7513	-10.8311	-0.386088	0.143996	-117.607	0.500299	2023-10-17 18:07:04
968	Session 5	ETH-4	-4.221	25.26	-5.86673	-5.36484	-11.7408	-10.1237	-6.51953	-10.1497	19.9662	-10.6226	-0.451105	0.583352	10.3537	0.431194	2023-10-17 02:14:47
548	Session 3	ETH-4	-4.221	25.26	-5.8704	-5.32086	-11.6703	-10.3761	-23.6727	-10.2255	19.8179	-10.7664	-0.419475	0.239802	-7.1731	0.443556	2022-07-08 01:17:58
359	Session 4	ETH-4	-4.221	25.26	-5.89837	-5.40483	-11.7405	-10.6726	-29.2749	-10.2255	19.82	-10.7644	-0.378406	0.108953	-12.6766	0.49807	2022-07-29 14:56:26
1151	Session 5	ETH-4	-4.221	25.26	-6.00971	-5.72661	-12.252	-11.3844	-90.9916	-10.2884	19.5981	-10.9796	-0.462464	0.036367	-74.7501	0.420096	2023-11-13 22:14:45
1601	Session 2	ETH-4	-4.221	25.26	-5.98021	-5.53084	-11.9732	-9.41555	-14.3193	-10.2054	19.782	-10.8013	-0.404398	1.63352	2.87234	0.429455	2021-09-18 00:49:16
717	Session 5	ETH-4	-4.221	25.26	-6.07473	-5.96542	-12.4456	-11.8824	105.698	-10.3488	19.3551	-11.2154	-0.354881	0.012906	126.064	0.534765	2023-10-31 23:47:56
1757	Session 2	ETH-4	-4.221	25.26	-5.97029	-5.49294	-11.9168	-6.40149	-1.82725	-10.1963	19.8207	-10.7637	-0.395122	4.60462	15.4954	0.454246	2021-10-15 23:41:38
877	Session 5	ETH-4	-4.221	25.26	-6.02243	-5.75012	-12.2635	-11.4149	-54.4668	-10.3011	19.5742	-11.0028	-0.437625	0.052823	-37.5149	0.447305	2023-11-28 16:57:09
156	Session 3	ETH-4	-4.221	25.26	-5.90858	-5.50285	-11.8797	-10.6945	-20.2142	-10.2595	19.6318	-10.947	-0.411797	0.284031	-3.25711	0.455203	2022-06-23 16:23:07
275	Session 3	ETH-4	-4.221	25.26	-5.86989	-5.38429	-11.7383	-10.4036	-21.9966	-10.2226	19.753	-10.8294	-0.426056	0.339589	-5.34458	0.443524	2022-06-15 19:21:30
602	Session 3	ETH-4	-4.221	25.26	-5.87991	-5.39105	-11.7247	-10.3482	-20.2869	-10.2331	19.7461	-10.8361	-0.395193	0.409223	-3.58177	0.473969	2022-06-22 02:44:39
812	Session 5	ETH-4	-4.221	25.26	-6.03612	-5.77534	-12.3169	-11.4364	-79.7749	-10.3147	19.5485	-11.0277	-0.452536	0.081847	-63.2162	0.430731	2023-11-11 10:48:28
116	Session 3	ETH-4	-4.221	25.26	-5.85212	-5.28165	-11.6203	-10.5475	-29.1763	-10.2075	19.858	-10.7276	-0.426552	-0.012337	-12.8655	0.438472	2022-06-29 17:02:52
388	Session 3	ETH-4	-4.221	25.26	-5.85554	-5.32629	-11.6546	-10.4641	-24.079	-10.2095	19.8123	-10.7719	-0.413566	0.161737	-7.59148	0.457278	2022-06-11 11:01:48
1312	Session 2	ETH-4	-4.221	25.26	-6.07667	-5.7419	-12.2516	-9.91791	-19.6514	-10.3003	19.5666	-11.0102	-0.377478	1.55062	-2.0335	0.478896	2021-10-21 19:52:46
973	Session 5	ETH-4	-4.221	25.26	-5.9105	-5.53442	-11.9191	-11.256	-26.7722	-10.19	19.7936	-10.79	-0.418506	-0.220318	-9.86477	0.465729	2023-10-15 08:27:55
769	Session 5	ETH-4	-4.221	25.26	-5.93258	-5.51748	-11.9648	-10.9987	-62.0772	-10.2141	19.8109	-10.7732	-0.458532	0.005797	-45.7924	0.424056	2023-11-08 10:46:25
855	Session 5	ETH-4	-4.221	25.26	-6.02286	-5.76985	-12.2915	-11.5818	-37.6447	-10.3008	19.5541	-11.0223	-0.446046	-0.076303	-20.3526	0.437425	2023-11-05 10:40:27
514	Session 3	ETH-4	-4.221	25.26	-5.91295	-5.43029	-11.818	-10.2217	-24.4424	-10.2668	19.706	-10.875	-0.416558	0.615951	-7.69614	0.44572	2022-07-12 01:46:55
767	Session 5	ETH-4	-4.221	25.26	-6.03552	-5.72948	-12.2485	-11.363	-41.5884	-10.3158	19.5952	-10.9824	-0.429327	0.063793	-24.4317	0.455448	2023-11-07 17:37:39
595	Session 3	ETH-4	-4.221	25.26	-5.83995	-5.28642	-11.6066	-10.1812	-19.7629	-10.1943	19.8531	-10.7323	-0.420615	0.367474	-3.29757	0.44644	2022-06-22 08:22:21
316	Session 4	ETH-4	-4.221	25.26	-5.90226	-5.42264	-11.8301	-10.6072	-30.5489	-10.229	19.8018	-10.782	-0.447487	0.210948	-13.9336	0.420325	2022-08-02 21:45:55
163	Session 3	ETH-4	-4.221	25.26	-5.99753	-5.70934	-12.1901	-10.9617	-19.9944	-10.3467	19.4207	-11.1517	-0.429464	0.429175	-2.53146	0.436578	2022-06-22 23:05:40
967	Session 5	ETH-4	-4.221	25.26	-5.91415	-5.67111	-12.1272	-11.8056	-55.5731	-10.1888	19.6544	-10.925	-0.490131	-0.501302	-38.9027	0.389649	2023-10-14 11:49:53
1634	Session 2	ETH-4	-4.221	25.26	-6.02216	-5.64612	-12.1	-9.87308	-20.9927	-10.2458	19.6643	-10.9154	-0.375308	1.40302	-3.64568	0.478943	2021-10-19 22:41:27
1415	Session 1	ETH-4	-4.221	25.26	-6.69649	-7.32898	-14.4625	-14.3166	-9.69304	-10.3234	19.4119	-11.1603	-0.40412	0.291892	11.946	0.437388	2021-09-12 19:18:12
515	Session 3	ETH-4	-4.221	25.26	-5.90299	-5.49047	-11.9035	-10.2643	-18.6161	-10.254	19.6444	-10.9347	-0.453916	0.694049	-1.66176	0.402771	2022-07-12 23:41:49
1350	Session 2	ETH-4	-4.221	25.26	-5.987	-5.61851	-12.0508	-7.76441	-3.7571	-10.2094	19.6924	-10.8881	-0.389206	3.47999	13.8017	0.453567	2021-10-01 01:53:03
1416	Session 1	ETH-4	-4.221	25.26	-6.56412	-6.92099	-13.8917	-13.8626	-21.3702	-10.1978	19.828	-10.7567	-0.366559	-0.069492	-0.935351	0.480927	2021-09-13 20:03:48
764	Session 5	ETH-4	-4.221	25.26	-6.05965	-5.84539	-12.4372	-11.6332	-60.441	-10.3372	19.4773	-11.0969	-0.480599	0.023635	-43.3779	0.400492	2023-11-07 02:13:23
508	Session 3	ETH-4	-4.221	25.26	-5.97886	-5.70461	-12.0886	-11.0101	-19.7781	-10.327	19.4255	-11.1471	-0.350882	0.370696	-2.34064	0.519631	2022-07-12 12:47:33
852	Session 5	ETH-4	-4.221	25.26	-6.01955	-5.71857	-12.2519	-11.224	-29.9906	-10.2992	19.6063	-10.9717	-0.460085	0.182487	-12.6645	0.422347	2023-11-04 18:52:43
169	Session 3	ETH-4	-4.221	25.26	-5.87623	-5.18617	-11.6242	-9.22408	-21.914	-10.2367	19.9557	-10.6328	-0.499767	1.13304	-5.6431	0.360312	2022-06-23 04:44:53
1541	Session 1	ETH-4	-4.221	25.26	-6.74045	-7.44097	-14.5796	-14.7551	-18.773	-10.366	19.2977	-11.271	-0.366413	0.072498	2.93722	0.477449	2021-09-12 01:15:48
636	Session 4	ETH-4	-4.221	25.26	-5.90912	-5.42501	-11.8472	-10.6556	-29.9521	-10.2362	19.7994	-10.7844	-0.455284	0.166695	-13.3147	0.416569	2022-07-15 19:57:49
177	Session 3	ETH-4	-4.221	25.26	-5.98413	-5.97098	-12.3264	-12.0486	0.823655	-10.3227	19.153	-11.4114	-0.322716	-0.144114	19.1698	0.551885	2022-06-23 10:41:10
708	Session 5	ETH-4	-4.221	25.26	-6.04061	-5.76272	-12.2679	-11.3679	-45.6334	-10.32	19.5614	-11.0152	-0.410818	0.125768	-28.48	0.474996	2023-11-02 05:13:39
1385	Session 1	ETH-4	-4.221	25.26	-6.77351	-7.50169	-14.7416	-13.6192	-11.1857	-10.3989	19.2358	-11.3311	-0.436226	1.34799	10.8498	0.410188	2021-09-16 00:27:26
974	Session 5	ETH-4	-4.221	25.26	-5.86719	-5.39119	-11.712	-10.7061	1373.03	-10.1492	19.9394	-10.6486	-0.395461	0.04771	1413.46	0.490278	2023-10-16 18:35:35
806	Session 5	ETH-4	-4.221	25.26	-6.03671	-5.76135	-12.2703	-11.0049	-40.1165	-10.3159	19.5628	-11.0139	-0.418569	0.490214	-22.8707	0.467151	2023-11-10 17:39:40
628	Session 4	ETH-4	-4.221	25.26	-5.97587	-5.68288	-12.1466	-11.1046	-20.2418	-10.2978	19.5355	-11.0404	-0.434094	0.231403	-2.8586	0.438464	2022-07-16 06:55:58
1445	Session 2	ETH-4	-4.221	25.26	-5.9305	-5.40908	-11.7885	-9.29496	-18.6481	-10.157	19.9063	-10.6807	-0.389435	1.51018	-1.8254	0.454298	2021-10-04 21:24:30
392	Session 3	ETH-4	-4.221	25.26	-5.86374	-5.3234	-11.6716	-10.3797	-19.2054	-10.2183	19.8153	-10.769	-0.425098	0.241258	-2.63245	0.445527	2022-06-11 01:19:35
552	Session 3	ETH-4	-4.221	25.26	-5.85066	-5.26044	-11.6017	-10.1475	-20.9771	-10.2067	19.8797	-10.7065	-0.430241	0.34928	-4.57187	0.431219	2022-07-08 11:13:44
554	Session 3	ETH-4	-4.221	25.26	-5.90113	-5.45763	-11.874	-10.291	-18.5294	-10.2532	19.678	-10.9021	-0.458502	0.60098	-1.64026	0.399076	2022-07-08 22:02:58
811	Session 5	ETH-4	-4.221	25.26	-6.12316	-6.04797	-12.6796	-11.1462	-240.112	-10.3972	19.2711	-11.2968	-0.459876	0.924211	-225.949	0.422921	2023-11-10 02:15:29
1343	Session 2	ETH-4	-4.221	25.26	-5.89697	-5.35319	-11.7005	-8.53272	-16.3671	-10.1234	19.9633	-10.6254	-0.390511	2.1681	0.348254	0.451024	2021-09-30 03:17:14
848	Session 5	ETH-4	-4.221	25.26	-6.04699	-5.89807	-12.4242	-11.8573	-31.5948	-10.3218	19.4236	-11.1489	-0.428539	-0.09718	-13.9186	0.456136	2023-11-04 05:15:52
958	Session 5	ETH-4	-4.221	25.26	-5.92498	-5.65169	-11.9296	-11.308	-129.44	-10.2011	19.6742	-10.9058	-0.298127	-0.037059	-114.097	0.593581	2023-10-16 05:04:10
318	Session 4	ETH-4	-4.221	25.26	-5.95017	-5.6247	-11.9993	-11.2028	-28.3549	-10.2726	19.595	-10.9826	-0.36919	0.01507	-11.2565	0.508773	2022-08-02 10:54:54
1514	Session 1	ETH-4	-4.221	25.26	-6.52154	-6.80815	-13.732	-13.504	-14.8244	-10.1567	19.943	-10.6451	-0.360603	0.06685	5.47665	0.46683	2021-09-01 21:26:50
1629	Session 2	ETH-4	-4.221	25.26	-5.98543	-5.51138	-11.9356	-9.07229	-23.7496	-10.2117	19.8019	-10.782	-0.380157	1.94139	-6.75507	0.472286	2021-10-19 00:46:35
1382	Session 1	ETH-4	-4.221	25.26	-6.52845	-6.83396	-13.8516	-12.5295	-7.2709	-10.1631	19.9167	-10.6706	-0.449043	1.10671	13.2451	0.392101	2021-09-14 22:54:06
1544	Session 1	ETH-4	-4.221	25.26	-6.56393	-7.00683	-13.9867	-13.9558	-19.7295	-10.1944	19.7404	-10.8416	-0.378117	0.008826	0.909391	0.463603	2021-09-11 18:26:02
930	Session 5	ETH-4	-4.221	25.26	-5.85902	-5.45444	-11.8163	-10.7918	-66.9779	-10.1382	19.875	-10.7111	-0.446977	0.088238	-50.9713	0.436097	2023-10-28 21:36:29
170	Session 3	ETH-4	-4.221	25.26	-5.91476	-5.49245	-11.8713	-10.7936	-25.6505	-10.2665	19.6424	-10.9366	-0.40715	0.16286	-8.80121	0.460135	2022-06-24 12:53:00
1144	Session 5	ETH-4	-4.221	25.26	-6.02796	-5.73356	-12.23	-11.3764	-37.757	-10.3076	19.5911	-10.9865	-0.414341	0.058509	-20.5317	0.471856	2023-11-14 13:46:40
1106	Session 5	ETH-4	-4.221	25.26	-6.012	-5.75218	-12.2774	-11.5476	-59.3501	-10.2899	19.5721	-11.0049	-0.460453	-0.077276	-42.4925	0.422605	2023-11-25 17:11:52
53	Session 4	ETH-4	-4.221	25.26	-5.97435	-5.80785	-12.3436	-10.4945	-5.05383	-10.2916	19.4075	-11.1645	-0.511476	1.10019	12.8473	0.354512	2022-07-22 00:13:11
98	Session 3	ETH-4	-4.221	25.26	-5.88601	-5.38914	-11.7629	-10.2683	-29.0433	-10.2396	19.7481	-10.8342	-0.429478	0.486108	-12.4848	0.434655	2022-07-02 18:52:28
593	Session 3	ETH-4	-4.221	25.26	-5.84166	-5.30672	-11.6153	-10.5114	-20.196	-10.1954	19.8323	-10.7525	-0.407611	0.074665	-3.69616	0.461253	2022-06-20 23:35:54
1573	Session 1	ETH-4	-4.221	25.26	-6.52911	-6.87265	-13.8693	-13.2795	-15.2582	-10.1624	19.8772	-10.7089	-0.428071	0.424271	5.17036	0.401578	2021-09-06 19:01:51
1013	Session 5	ETH-4	-4.221	25.26	-5.85511	-5.38612	-11.74	-10.456	202.91	-10.1366	19.9445	-10.6436	-0.441329	0.290245	223.377	0.441902	2023-10-24 20:52:51
600	Session 3	ETH-4	-4.221	25.26	-5.87022	-5.35816	-11.7186	-10.2901	-18.7405	-10.2239	19.7797	-10.8035	-0.431659	0.401772	-2.08421	0.434897	2022-06-21 21:45:19
1188	Session 5	ETH-4	-4.221	25.26	-5.88787	-5.44192	-11.8244	-10.5993	-136.675	-10.1693	19.8878	-10.6987	-0.437579	0.257612	-121.859	0.445708	2023-10-19 19:57:55
121	Session 3	ETH-4	-4.221	25.26	-5.8416	-5.31953	-11.6887	-10.5262	-24.431	-10.1948	19.8192	-10.7652	-0.469245	0.085386	-7.97745	0.39223	2022-06-27 22:21:20
244	Session 4	ETH-4	-4.221	25.26	-5.89002	-5.52221	-11.87	-10.6731	-31.1132	-10.2122	19.6998	-10.881	-0.402168	0.344571	-14.3266	0.47171	2022-07-26 13:33:31
1674	Session 2	ETH-4	-4.221	25.26	-5.90927	-5.35653	-11.7729	-8.48527	-15.7972	-10.1364	19.96	-10.6286	-0.447659	2.22278	0.947734	0.387442	2021-09-28 02:13:15
1780	Session 2	ETH-4	-4.221	25.26	-5.90873	-5.31048	-11.6683	-8.94192	-18.5974	-10.1375	20.007	-10.583	-0.387882	1.66846	-1.9915	0.449116	2021-09-24 06:18:07
1310	Session 2	ETH-4	-4.221	25.26	-6.05627	-5.70533	-12.202	-8.9644	-13.9858	-10.28	19.6039	-10.974	-0.384611	2.44143	3.6395	0.469411	2021-10-20 20:43:31
93	Session 3	ETH-4	-4.221	25.26	-5.71672	-5.03005	-11.25	-9.45017	-27.1147	-10.0724	20.1151	-10.4782	-0.441109	0.590498	-11.4043	0.421598	2022-07-03 04:32:54
476	Session 3	ETH-4	-4.221	25.26	-5.8521	-5.30315	-11.6234	-10.3168	-23.5847	-10.2066	19.836	-10.7489	-0.408497	0.2641	-7.13791	0.460544	2022-06-19 07:49:55
242	Session 4	ETH-4	-4.221	25.26	-5.91108	-5.54803	-11.8972	-11.0117	-28.867	-10.2337	19.6734	-10.9066	-0.382305	0.05411	-11.9688	0.493566	2022-07-27 14:08:09
276	Session 3	ETH-4	-4.221	25.26	-5.87082	-5.51133	-11.8256	-10.7489	-13.9299	-10.2189	19.623	-10.9555	-0.387862	0.246	3.11222	0.483315	2022-06-16 15:43:20
58	Session 4	ETH-4	-4.221	25.26	-5.83399	-5.26225	-11.5673	-10.2119	-31.2627	-10.1621	19.9659	-10.6229	-0.41098	0.287881	-15.0439	0.462419	2022-07-21 13:29:07
470	Session 3	ETH-4	-4.221	25.26	-5.85521	-5.35038	-11.6272	-10.3788	-26.4309	-10.2082	19.7876	-10.7958	-0.362461	0.296446	-9.93628	0.50957	2022-06-19 13:45:02
243	Session 4	ETH-4	-4.221	25.26	-5.90501	-5.45477	-11.9062	-10.7528	-27.752	-10.2307	19.7689	-10.814	-0.489776	0.128337	-11.0231	0.375845	2022-07-26 02:24:42
1478	Session 2	ETH-4	-4.221	25.26	-5.96796	-5.48673	-11.8971	-9.01464	-15.0187	-10.194	19.8271	-10.7576	-0.383764	1.95	2.06025	0.465291	2021-10-12 16:03:39
1194	Session 5	ETH-4	-4.221	25.26	-5.83848	-5.33596	-11.6782	-10.4262	-80.6279	-10.1207	19.9956	-10.5941	-0.445596	0.219531	-65.095	0.4372	2023-10-20 03:36:14
1713	Session 2	ETH-4	-4.221	25.26	-5.89985	-5.31489	-11.6368	-8.34671	-16.644	-10.1279	20.0025	-10.5874	-0.360887	2.27893	-0.00589	0.480122	2021-09-26 21:53:26
1189	Session 5	ETH-4	-4.221	25.26	-5.84443	-5.34607	-11.6778	-9.95489	5.73391	-10.1267	19.9853	-10.6041	-0.429038	0.71625	22.7529	0.454889	2023-10-21 04:22:33
27	Session 4	ETH-4	-4.221	25.26	-5.95566	-5.65396	-12.1188	-10.9079	-19.2304	-10.2773	19.5651	-11.0117	-0.455547	0.372246	-1.90795	0.413898	2022-07-24 03:45:49
1506	Session 1	ETH-4	-4.221	25.26	-6.62029	-7.02163	-14.0885	-14.0701	-22.0208	-10.2538	19.7254	-10.8562	-0.408158	-0.077259	-1.34049	0.420627	2021-09-03 11:39:01
1195	Session 5	ETH-4	-4.221	25.26	-5.83711	-5.35758	-11.6677	-10.4128	24.0536	-10.1185	19.9735	-10.6155	-0.415091	0.276516	41.3981	0.469716	2023-10-20 20:46:02
29	Session 4	ETH-4	-4.221	25.26	-5.88997	-5.40555	-11.697	-10.5272	-29.6548	-10.2165	19.8193	-10.7651	-0.342419	0.25738	-13.0705	0.536771	2022-07-24 14:19:23
1476	Session 2	ETH-4	-4.221	25.26	-6.1549	-5.99568	-12.631	-10.0061	-20.4178	-10.3742	19.3074	-11.2616	-0.429371	1.97287	-2.22955	0.413053	2021-10-11 18:12:37
1100	Session 5	ETH-4	-4.221	25.26	-5.99153	-5.77151	-12.2269	-11.4601	-32.5994	-10.2674	19.5523	-11.024	-0.411482	0.050185	-15.2464	0.475349	2023-11-25 00:28:20
585	Session 3	ETH-4	-4.221	25.26	-5.91915	-5.64384	-11.9826	-11.1956	-22.4633	-10.2656	19.4875	-11.0869	-0.365589	0.060859	-5.25673	0.505984	2022-06-21 16:07:21
128	Session 3	ETH-4	-4.221	25.26	-5.87068	-5.40597	-11.7587	-10.74	-30.136	-10.2227	19.7308	-10.8509	-0.424442	0.043098	-13.5795	0.440583	2022-06-30 17:59:32
22	Session 4	ETH-4	-4.221	25.26	-5.9222	-5.4887	-11.905	-10.5915	-27.4961	-10.2478	19.7342	-10.8476	-0.437217	0.359611	-10.6782	0.43389	2022-07-23 17:11:03
1273	Session 2	ETH-4	-4.221	25.26	-5.92199	-5.3834	-11.746	-8.31659	-17.1422	-10.1489	19.9325	-10.6552	-0.380731	2.44745	-0.35351	0.466874	2021-10-08 22:20:09
1012	Session 5	ETH-4	-4.221	25.26	-5.89475	-5.47682	-11.8966	-10.6314	43.9691	-10.1754	19.8522	-10.7331	-0.469013	0.295473	61.9666	0.412345	2023-10-23 20:44:26
1178	Session 5	ETH-4	-4.221	25.26	-5.84783	-5.36745	-11.7501	-10.1507	29.1862	-10.1295	19.9635	-10.6252	-0.477515	0.561323	46.6501	0.403235	2023-10-20 12:33:08
1105	Session 5	ETH-4	-4.221	25.26	-5.95608	-5.65718	-12.1301	-11.1855	-63.6701	-10.234	19.6687	-10.9112	-0.463386	0.097942	-47.126	0.419293	2023-11-24 09:26:40
597	Session 3	ETH-4	-4.221	25.26	-5.79481	-5.15846	-11.4298	-10.055	-19.9709	-10.1509	19.9839	-10.6054	-0.415082	0.237692	-3.80919	0.453119	2022-06-21 04:26:14
59	Session 4	ETH-4	-4.221	25.26	-5.93206	-5.4808	-11.8707	-10.5744	-27.7635	-10.2586	19.7423	-10.8398	-0.400168	0.361026	-10.9552	0.473958	2022-07-22 11:13:46
1705	Session 2	ETH-4	-4.221	25.26	-5.96232	-5.48546	-11.9168	-9.38821	-16.831	-10.1881	19.8283	-10.7563	-0.41079	1.56973	0.207922	0.425565	2021-09-25 23:02:32
1005	Session 5	ETH-4	-4.221	25.26	-5.91128	-5.52031	-11.9195	-10.4686	-7.71901	-10.1914	19.808	-10.7761	-0.432062	0.547497	9.49212	0.451757	2023-10-24 08:05:13
675	Session 5	ETH-4	-4.221	25.26	-5.82584	-5.27931	-11.6179	-10.0943	-119.744	-10.1094	20.0532	-10.5382	-0.453754	0.441006	-104.984	0.428687	2023-10-25 20:15:20
1574	Session 1	ETH-4	-4.221	25.26	-6.66924	-7.19141	-14.3046	-14.0532	-14.0838	-10.2995	19.5522	-11.0241	-0.408408	0.281858	7.15554	0.423993	2021-09-07 07:03:01
1569	Session 1	ETH-4	-4.221	25.26	-6.48775	-6.70615	-13.6246	-12.9959	-14.7259	-10.1245	20.047	-10.5442	-0.387721	0.376421	5.33789	0.445078	2021-09-07 00:50:23
1559	Session 1	ETH-4	-4.221	25.26	-6.55118	-6.92468	-13.8863	-13.766	-14.4685	-10.1839	19.8242	-10.7604	-0.370912	0.035837	6.10384	0.465836	2021-09-07 18:58:48
1675	Session 2	ETH-4	-4.221	25.26	-5.90577	-5.35808	-11.7334	-8.53386	-19.208	-10.1326	19.9584	-10.6302	-0.409781	2.1768	-2.52179	0.429237	2021-09-29 01:31:16
475	Session 3	ETH-4	-4.221	25.26	-5.97886	-5.62543	-12.0488	-10.5627	-22.7853	-10.3299	19.5065	-11.0685	-0.388793	0.663868	-5.55691	0.481857	2022-06-18 10:26:26
351	Session 4	ETH-4	-4.221	25.26	-5.95374	-5.7093	-12.0878	-11.103	-15.9857	-10.2733	19.5084	-11.0667	-0.371416	0.286252	1.50155	0.505758	2022-07-28 17:49:29
1602	Session 2	ETH-4	-4.221	25.26	-6.10619	-5.92187	-12.4594	-10.3222	-13.3708	-10.3251	19.3827	-11.1885	-0.379267	1.50422	4.74911	0.456571	2021-09-21 10:36:46
883	Session 5	ETH-4	-4.221	25.26	-6.01233	-5.76848	-12.294	-11.4372	-96.8773	-10.2897	19.5555	-11.021	-0.460848	0.067166	-80.6623	0.422228	2023-11-28 01:10:17
458	Session 3	ETH-4	-4.221	25.26	-5.84598	-5.31232	-11.6849	-10.5283	-20.1071	-10.1998	19.8266	-10.758	-0.467952	0.068795	-3.59022	0.397287	2022-06-19 03:01:06
1049	Session 5	ETH-4	-4.221	25.26	-5.99912	-5.73608	-12.2345	-11.2117	-40.5723	-10.2768	19.5884	-10.989	-0.446396	0.230169	-23.4228	0.437491	2023-11-17 07:22:45
1234	Session 5	ETH-4	-4.221	25.26	-5.85605	-5.45816	-11.7226	-10.542	249.644	-10.1349	19.8712	-10.7148	-0.351528	0.348209	271.087	0.537087	2023-10-18 01:52:03
437	Session 4	ETH-4	-4.221	25.26	-5.89035	-5.48255	-11.902	-10.6576	-29.118	-10.214	19.7404	-10.8416	-0.473291	0.280425	-12.3739	0.3963	2022-07-20 02:13:58
468	Session 3	ETH-4	-4.221	25.26	-5.89967	-5.44516	-11.89	-10.6127	-23.1586	-10.2521	19.6908	-10.8897	-0.488456	0.250585	-6.37521	0.376218	2022-06-18 04:40:13
206	Session 3	ETH-4	-4.221	25.26	-5.84926	-5.28304	-11.6343	-10.0932	-23.2023	-10.2044	19.8565	-10.729	-0.44237	0.449676	-6.79153	0.418883	2022-07-05 06:16:48
1221	Session 5	ETH-4	-4.221	25.26	-5.88436	-5.56708	-11.9397	-10.5087	170.067	-10.161	19.7603	-10.8223	-0.434144	0.601097	190.437	0.449278	2023-10-18 10:39:39
1575	Session 1	ETH-4	-4.221	25.26	-6.60651	-7.07283	-14.0746	-14.0729	-20.5665	-10.2372	19.6731	-10.9069	-0.357707	0.023046	0.231127	0.480892	2021-09-08 01:09:04
929	Session 5	ETH-4	-4.221	25.26	-5.68274	-5.2625	-11.4424	-10.0176	-45.4543	-9.9578	20.07	-10.5219	-0.44128	0.48479	-29.63	0.44207	2023-10-27 21:16:44
168	Session 3	ETH-4	-4.221	25.26	-5.87475	-5.35852	-11.6676	-10.4154	-22.2358	-10.2288	19.7794	-10.8038	-0.374975	0.27583	-5.63338	0.495539	2022-06-22 18:14:19
473	Session 3	ETH-4	-4.221	25.26	-5.91736	-5.50063	-11.9317	-10.721	-20.5576	-10.2689	19.6341	-10.9448	-0.457492	0.252684	-3.60141	0.409272	2022-06-17 23:45:05
203	Session 3	ETH-4	-4.221	25.26	-5.83403	-5.25407	-11.5884	-10.284	-27.8229	-10.1892	19.8861	-10.7002	-0.440301	0.198584	-11.5624	0.421561	2022-07-04 20:12:05
1152	Session 5	ETH-4	-4.221	25.26	-6.00292	-5.68903	-12.1927	-11.2713	-46.648	-10.2826	19.6364	-10.9425	-0.446644	0.075201	-29.6934	0.437143	2023-11-15 05:14:35
354	Session 4	ETH-4	-4.221	25.26	-5.90069	-5.44863	-11.8653	-10.6308	-29.8011	-10.2263	19.7752	-10.8079	-0.459021	0.239332	-13.1239	0.408545	2022-07-29 04:26:12
1790	Session 2	ETH-4	-4.221	25.26	-5.94902	-5.43447	-11.8352	-8.40845	-18.5081	-10.1758	19.8804	-10.7058	-0.392423	2.45753	-1.61304	0.443285	2021-09-22 17:40:07
1753	Session 2	ETH-4	-4.221	25.26	-5.97666	-5.53737	-11.9763	-4.32887	-2.86654	-10.2014	19.7753	-10.8077	-0.404782	6.79013	14.5341	0.442302	2021-10-14 20:14:58
1580	Session 1	ETH-4	-4.221	25.26	-6.86266	-7.65717	-14.8959	-15.0022	-16.9223	-10.4879	19.0774	-11.4848	-0.346319	0.257378	5.39096	0.493875	2021-09-08 14:01:31
670	Session 5	ETH-4	-4.221	25.26	-5.80395	-5.2399	-11.5389	-10.0841	-34.5139	-10.0875	20.0933	-10.4993	-0.435449	0.372051	-18.4245	0.448231	2023-10-26 07:53:42
1510	Session 1	ETH-4	-4.221	25.26	-6.58729	-7.07265	-14.0739	-13.9682	-15.8683	-10.2168	19.6732	-10.9068	-0.377168	0.128877	5.00796	0.4516	2021-09-02 09:28:52
1056	Session 5	ETH-4	-4.221	25.26	-5.99947	-5.6931	-12.2142	-11.3081	-65.7336	-10.2788	19.6322	-10.9466	-0.467926	0.046166	-49.1143	0.414367	2023-11-18 15:34:16
99	Session 3	ETH-4	-4.221	25.26	-5.90144	-5.44311	-11.8054	-9.88277	-24.6941	-10.2541	19.6929	-10.8877	-0.403134	0.984451	-7.93923	0.463054	2022-07-03 15:25:00
1235	Session 5	ETH-4	-4.221	25.26	-5.87835	-5.27579	-11.6987	-10.3256	-18.1493	-10.1654	20.0569	-10.5346	-0.484438	0.200238	-1.63678	0.395826	2023-10-18 18:51:21
1272	Session 2	ETH-4	-4.221	25.26	-5.9542	-5.46027	-11.8625	-9.08223	-22.5318	-10.1803	19.8541	-10.7314	-0.389157	1.82836	-5.64982	0.456352	2021-10-08 00:36:37
1579	Session 1	ETH-4	-4.221	25.26	-6.58979	-7.00786	-13.9767	-14.1774	-15.0866	-10.2219	19.7394	-10.8426	-0.34012	-0.213853	5.68002	0.497482	2021-09-07 13:14:16
196	Session 3	ETH-4	-4.221	25.26	-5.90953	-5.43817	-11.8409	-10.7527	-24.3088	-10.2629	19.698	-10.8828	-0.43552	0.095007	-7.54842	0.426155	2022-07-06 12:03:35
1053	Session 5	ETH-4	-4.221	25.26	-6.02574	-5.7739	-12.2734	-11.3768	-41.9992	-10.3037	19.55	-11.0263	-0.420751	0.139231	-24.7744	0.465152	2023-11-17 22:34:48
1435	Session 2	ETH-4	-4.221	25.26	-5.98651	-5.58382	-11.9968	-7.52182	-16.5696	-10.2102	19.7279	-10.8537	-0.36942	3.65529	0.694312	0.477436	2021-10-05 20:34:18
924	Session 5	ETH-4	-4.221	25.26	-5.80592	-5.28206	-11.6402	-9.41719	-31.6517	-10.0881	20.0504	-10.5409	-0.494252	1.13089	-15.4305	0.38552	2023-10-28 08:37:03
165	Session 3	ETH-4	-4.221	25.26	-5.89813	-5.40983	-11.7944	-10.415	-28.9184	-10.2518	19.7269	-10.8547	-0.428314	0.379435	-12.3046	0.437034	2022-06-24 18:47:08
676	Session 5	ETH-4	-4.221	25.26	-5.81281	-5.26401	-11.6454	-9.96803	-22.2184	-10.0961	20.0688	-10.5231	-0.510144	0.537875	-5.86726	0.368529	2023-10-26 20:58:45
482	Session 3	ETH-4	-4.221	25.26	-5.92523	-5.68637	-12.0777	-11.3475	-14.506	-10.2705	19.444	-11.1291	-0.413531	-0.007271	2.93143	0.455456	2022-06-18 21:15:58

## Sheet: session47
Session	Na	Nu	d13Cwg_VPDB	d18Owg_VSMOW	r_d13C	r_d18O	r_D47	a ± SE	1e3 x b ± SE	c ± SE	a2 ± SE	b2 ± SE	c2 ± SE
Session 1	88	68	-4.221	25.26	0.0915	0.2315	0.0456	0.925 ± 0.022	0.033 ± 0.299	-0.804 ± 0.009	-6.3e-04 ± 4.6e-04	8.0e-06 ± 6.1e-06	2.3e-04 ± 2.0e-04
Session 2	147	258	-4.221	25.26	0.0501	0.1224	0.03	0.906 ± 0.017	-0.042 ± 0.244	-0.802 ± 0.007	-2.5e-04 ± 1.2e-04	1.2e-06 ± 1.6e-06	7.9e-05 ± 5.3e-05
Session 3	179	222	-4.221	25.26	0.0473	0.1272	0.047	0.921 ± 0.015	-0.026 ± 0.220	-0.831 ± 0.006	-2.0e-04 ± 1.1e-04	-9.7e-07 ± 1.7e-06	1.0e-04 ± 5.7e-05
Session 4	89	156	-4.221	25.26	0.0469	0.1325	0.074	0.921 ± 0.021	0.132 ± 0.296	-0.835 ± 0.009	-3.3e-04 ± 2.4e-04	3.1e-06 ± 3.7e-06	1.9e-04 ± 1.2e-04
Session 5	252	345	-4.221	25.26	0.0968	0.2337	0.0466	0.934 ± 0.014	0.244 ± 0.200	-0.851 ± 0.006	-2.9e-05 ± 6.2e-05	1.3e-06 ± 8.7e-07	2.5e-05 ± 2.8e-05
